# Supplementary material
Source: PubMed Central journal article supplement (PMC4081462)
Supplement: NIHMS582146-supplement-supplemental.pdf [file NIHMS582146-supplement-supplemental.pdf]

## Supporting Information for

### **Hemiasterline analogues incorporating an aromatic, and heterocyclic type C-terminus: design, synthesis and biological evaluation**

*Giordano Lesma,\*<sup>a</sup> Alessandro Sacchetti,\*<sup>b</sup> Rouli Bai,<sup>c</sup> Giuseppe Basso,<sup>d</sup> Roberta Bortolozzi,<sup>d</sup>  
Ernest Hamel,<sup>c</sup> Alessandra Silvani,\*<sup>a</sup> Nadia Vaiana,<sup>a</sup> and Giampietro Viola<sup>d</sup>*

*<sup>a</sup>Università di Milano, Dipartimento di Chimica, via Golgi 19, Milano, 20133, Italy. E-mail: [alessandra.silvani@unimi.it](mailto:alessandra.silvani@unimi.it). <sup>b</sup>Politecnico di Milano, Dipartimento di Chimica, Materiali ed Ing.Chimica 'Giulio Natta', p.zza Leonardo da Vinci 32, Milano, 20133, Italy. E-mail: [alessandro.sacchetti@polimi.it](mailto:alessandro.sacchetti@polimi.it)  
<sup>c</sup>Screening Technologies Branch, Developmental Therapeutics Program, Division of Cancer Treatment and Diagnosis, National Cancer Institute, Frederick National Laboratory for Cancer Research, National Institutes of Health, Frederick, Maryland 21702, USA. <sup>d</sup>Università degli Studi di Padova, Dipartimento di Salute della Donna e del Bambino, via Giustiniani 2, Padova, 35128, Italy.; E-mail: [giampietro.viola.1@unipd.it](mailto:giampietro.viola.1@unipd.it)*

## Table of Contents

|                                      |        |
|--------------------------------------|--------|
| NMR spectra of compounds <b>3-36</b> | S2-S35 |
| HPLC for compound <b>12</b>          | S36    |

# Compound 10

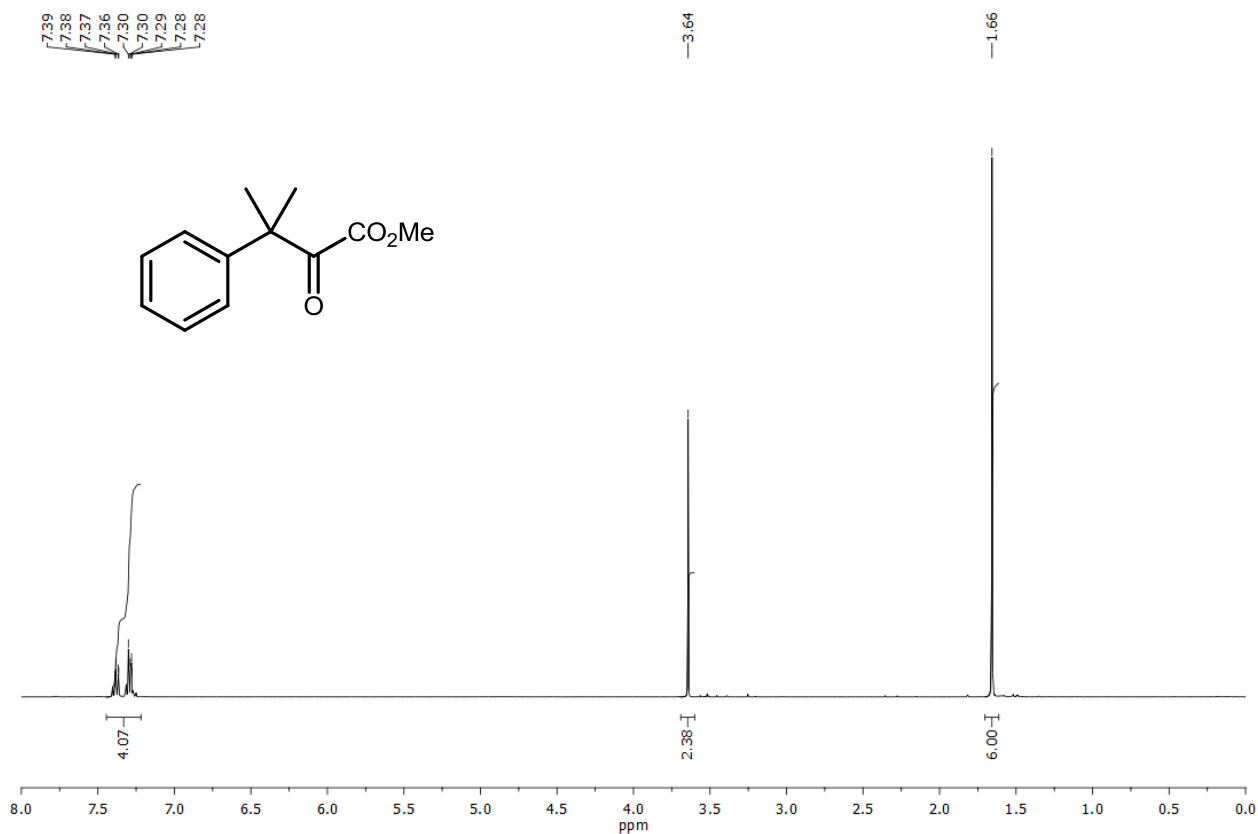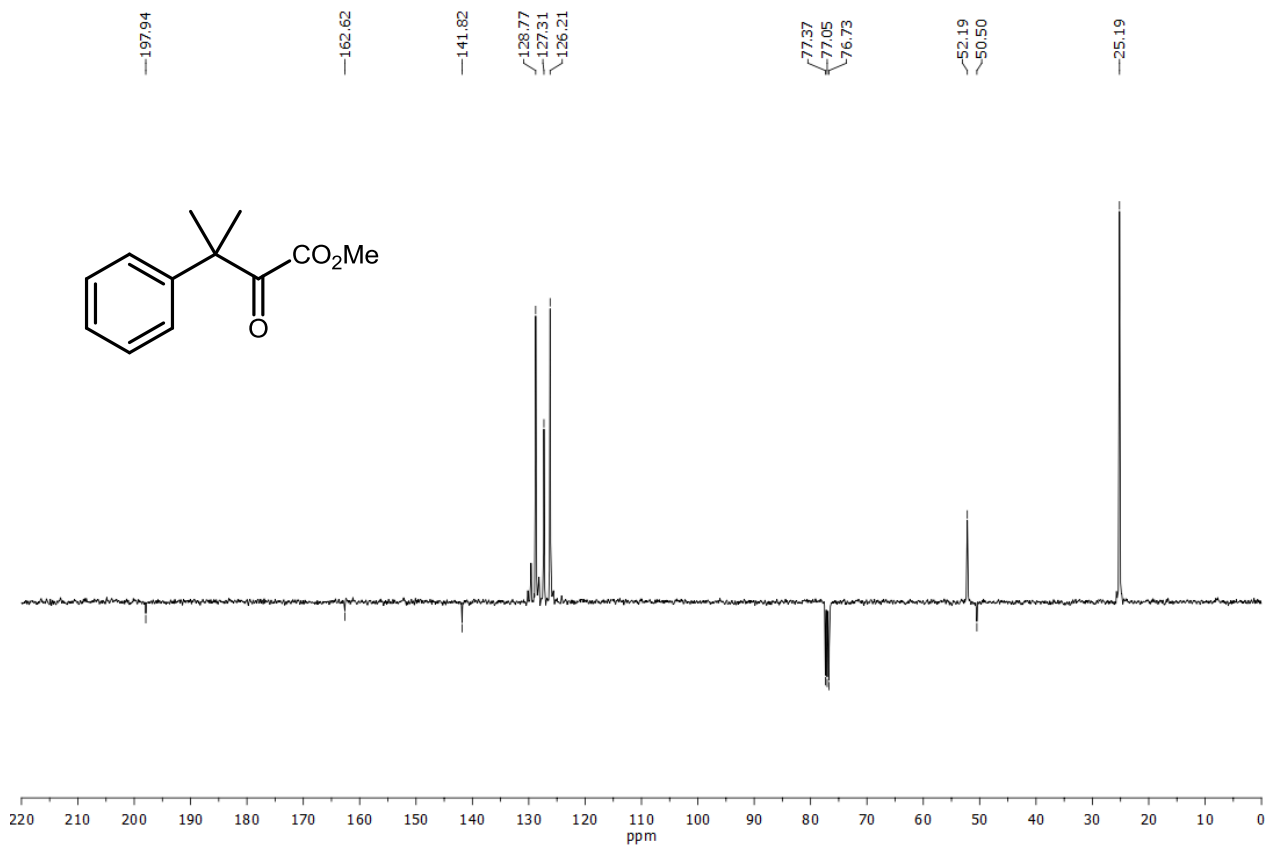

# Compound 11

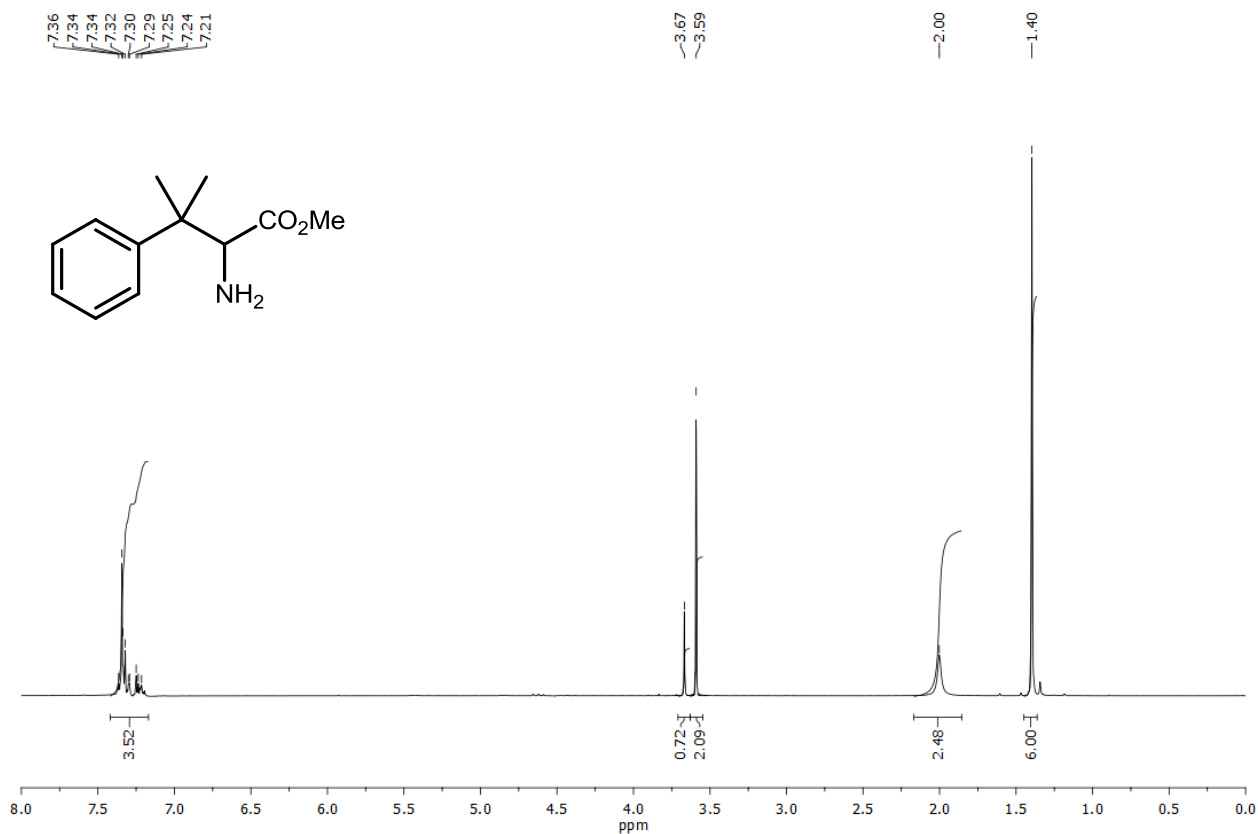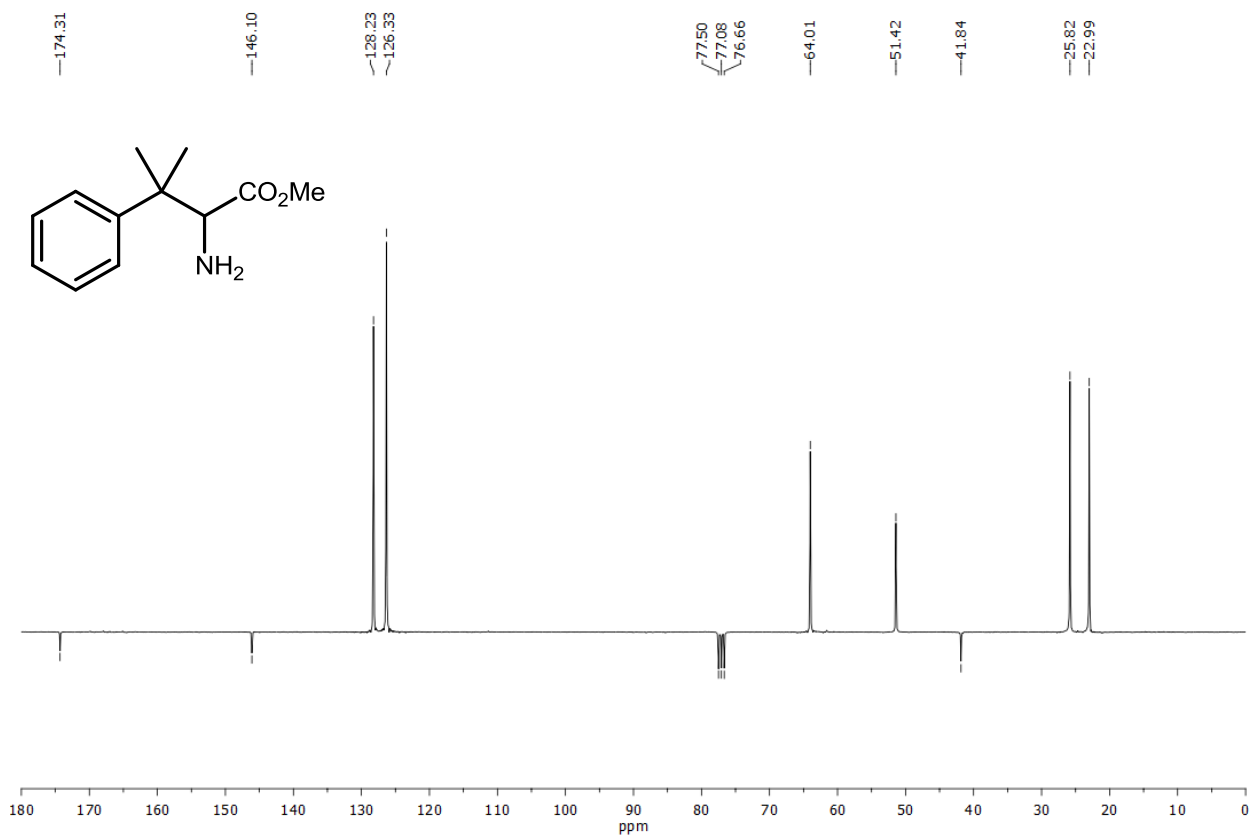

# Compound 12

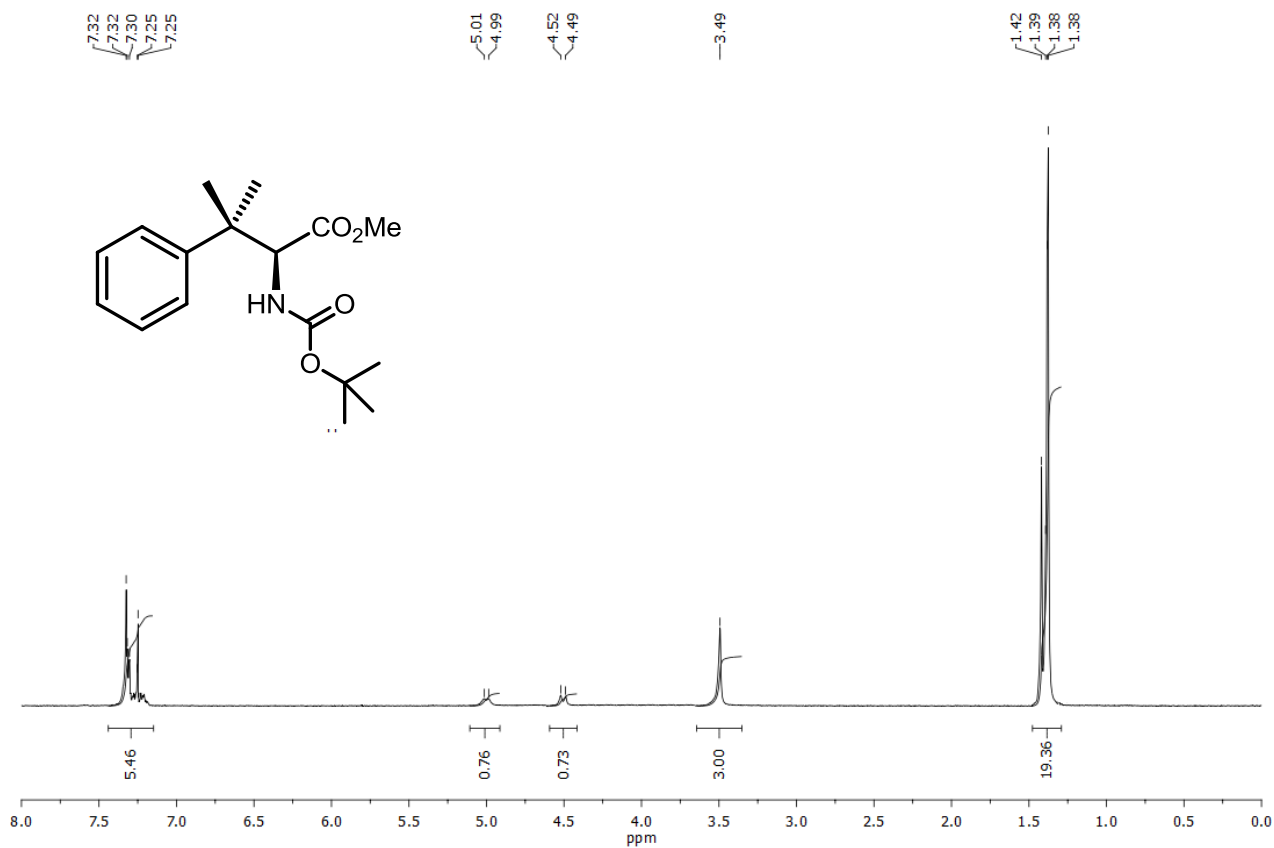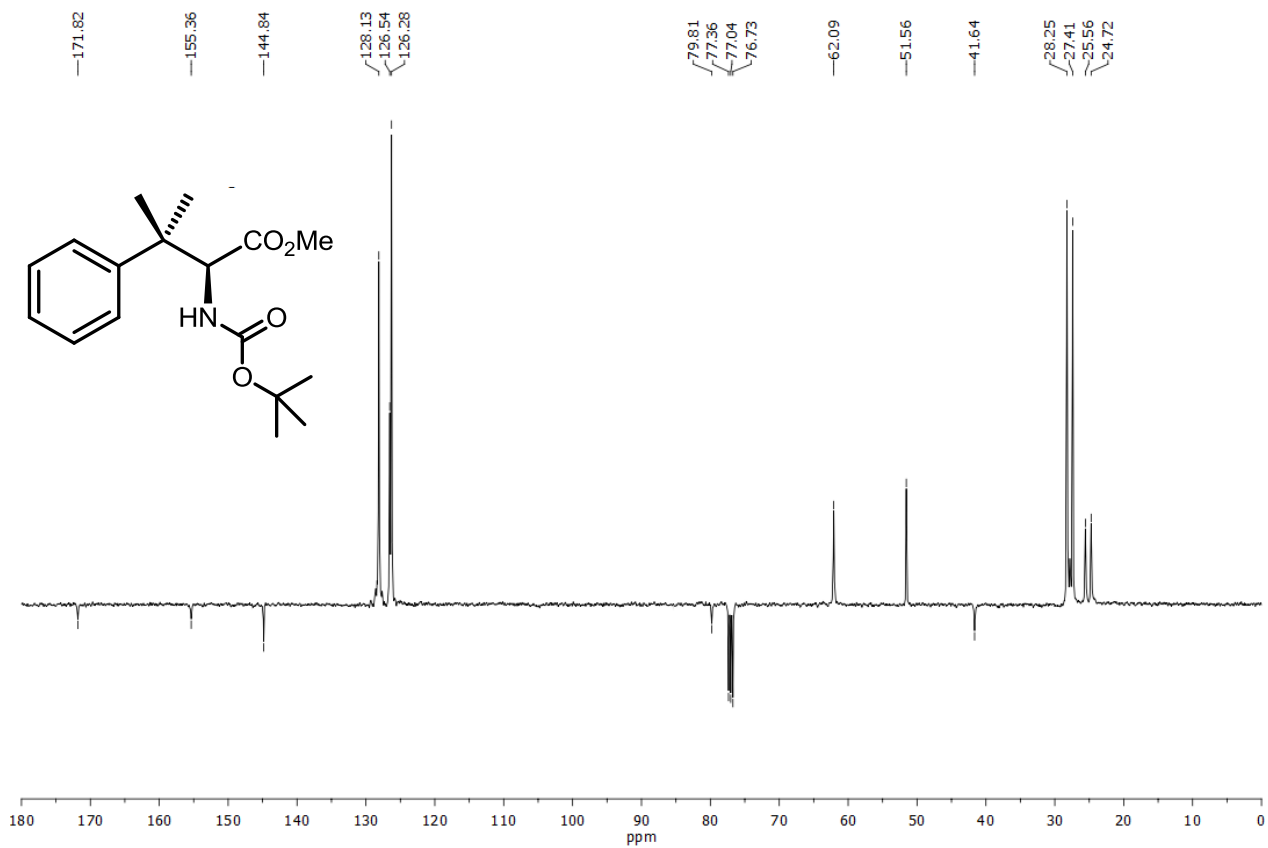



**Compound 13** (*known product*)

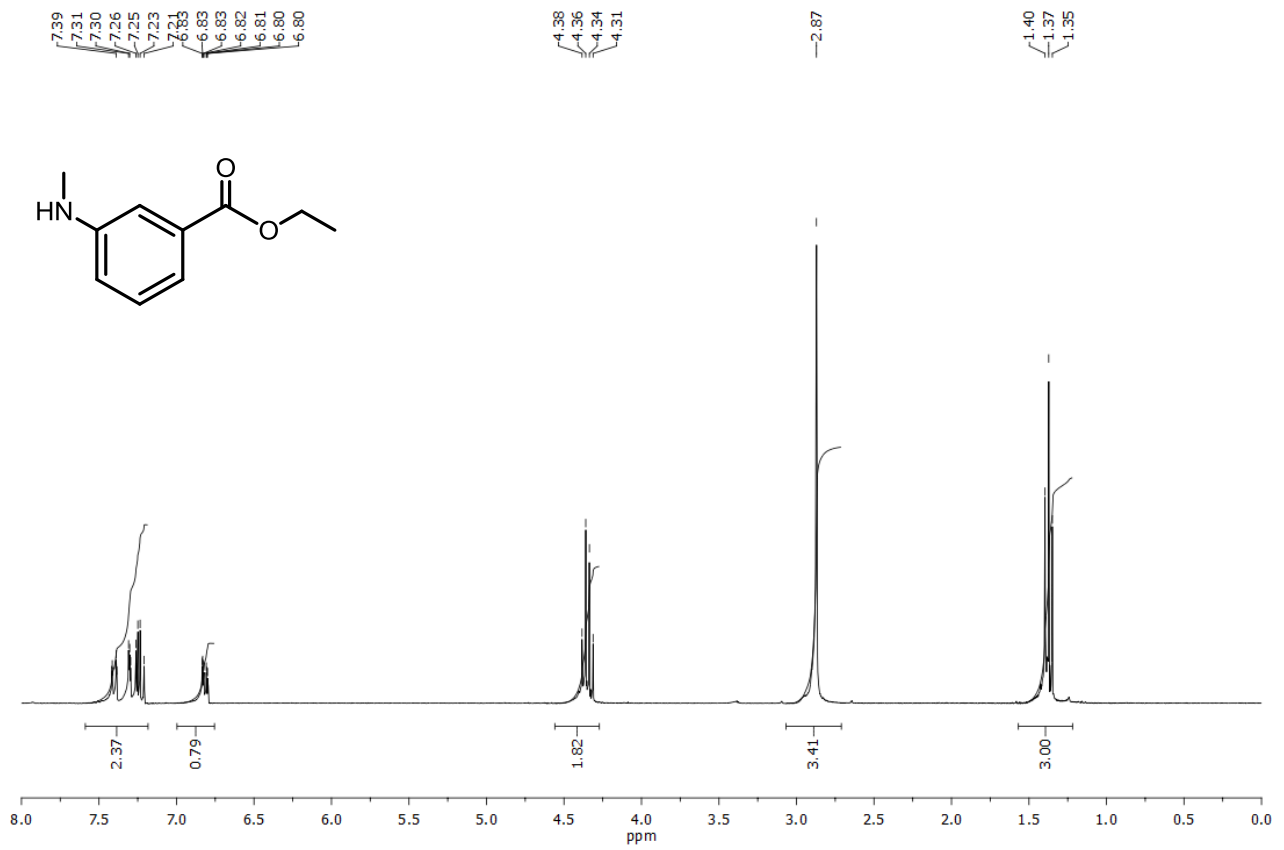

# Compound 14

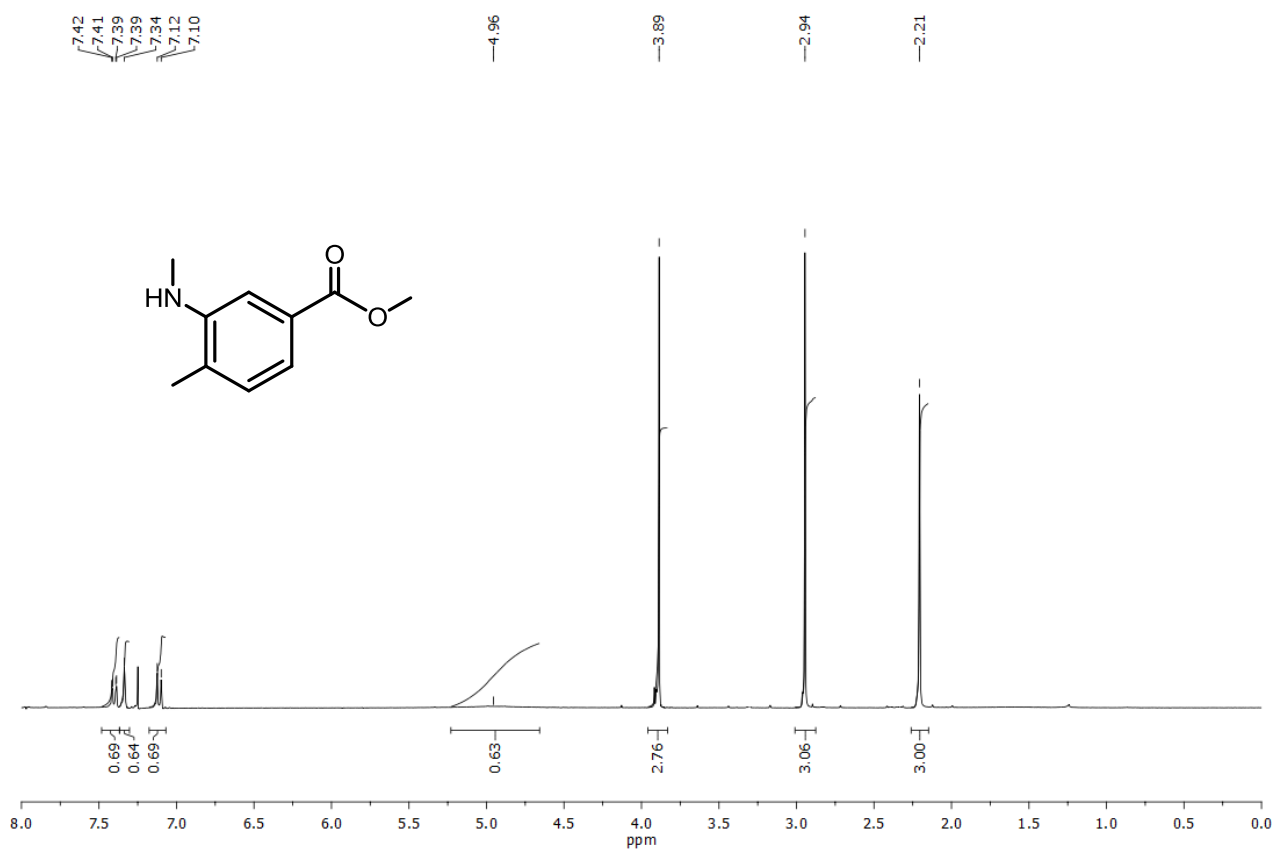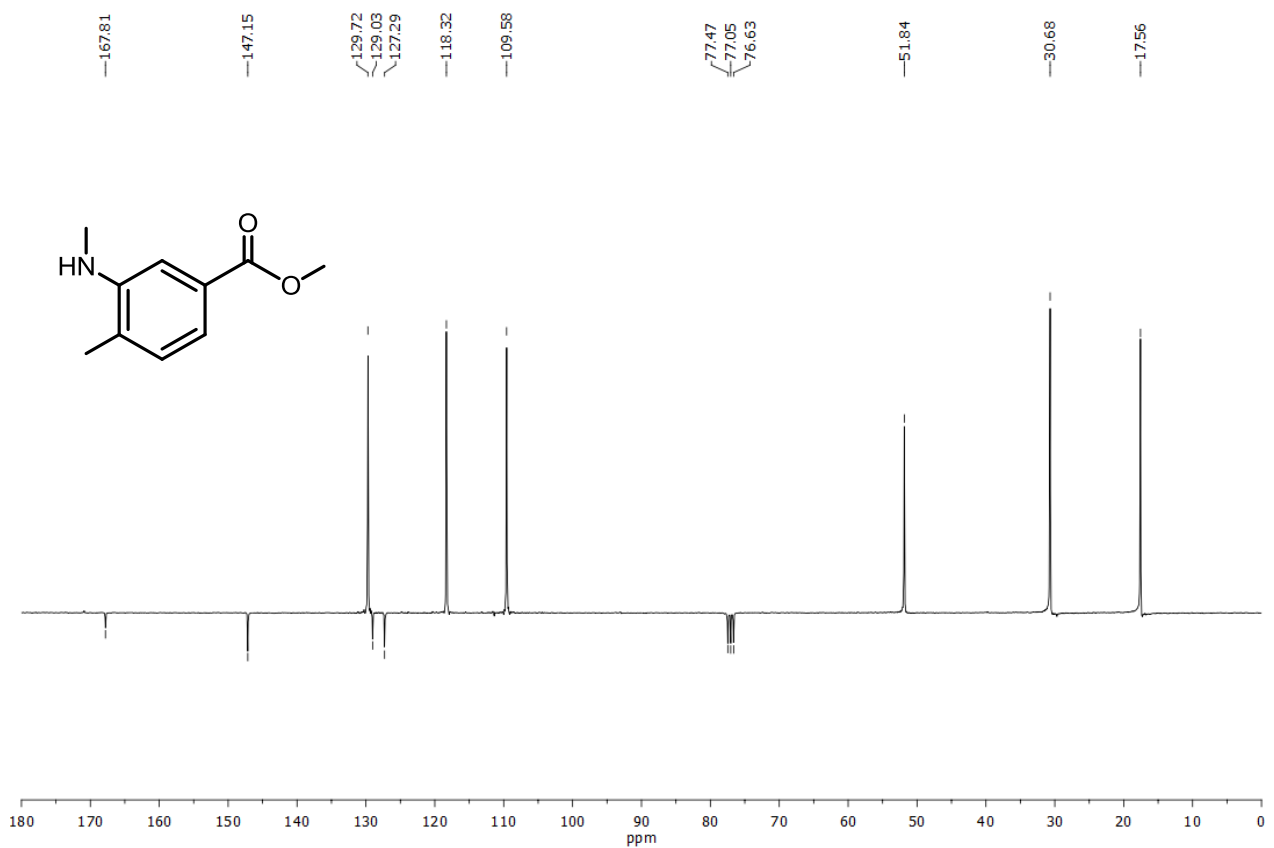

# Compound 15

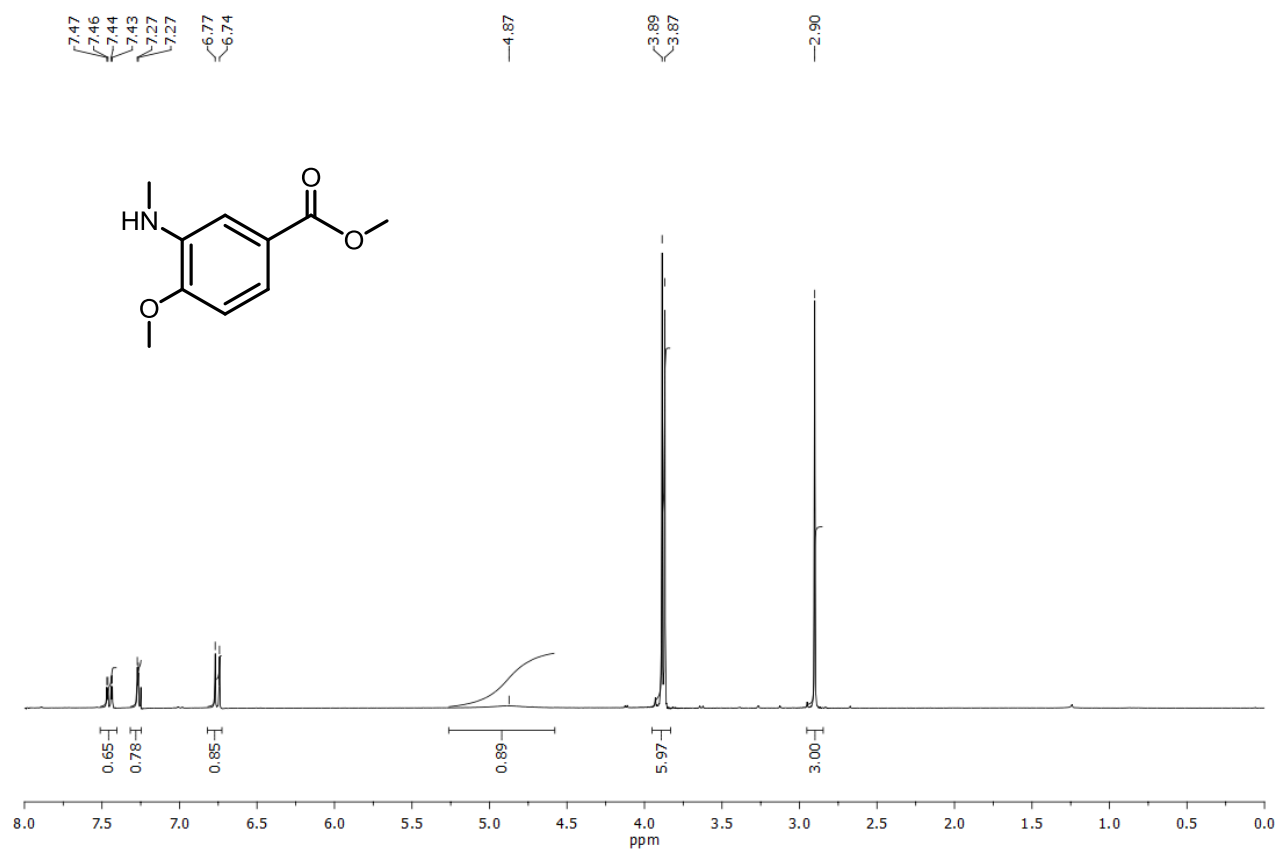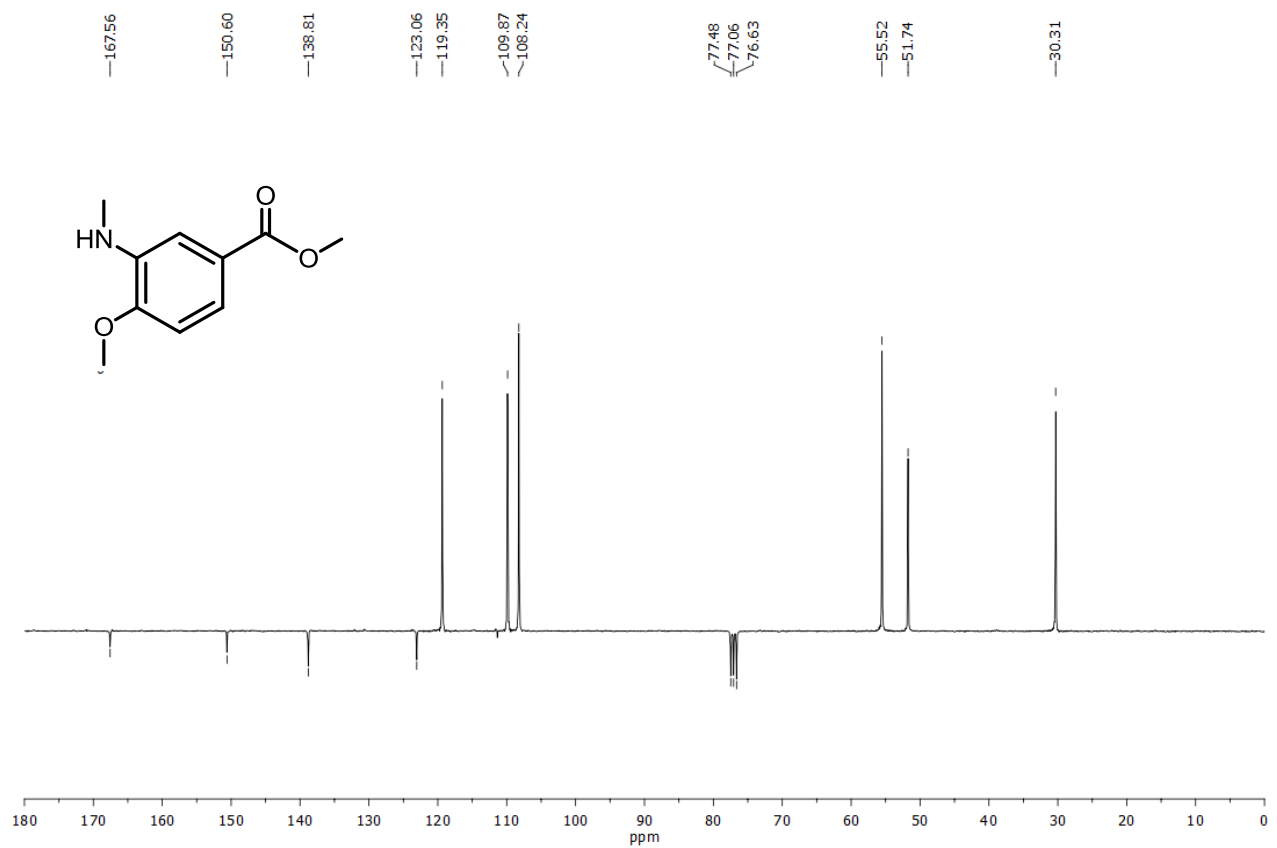



**Compound 16** (*known product*)

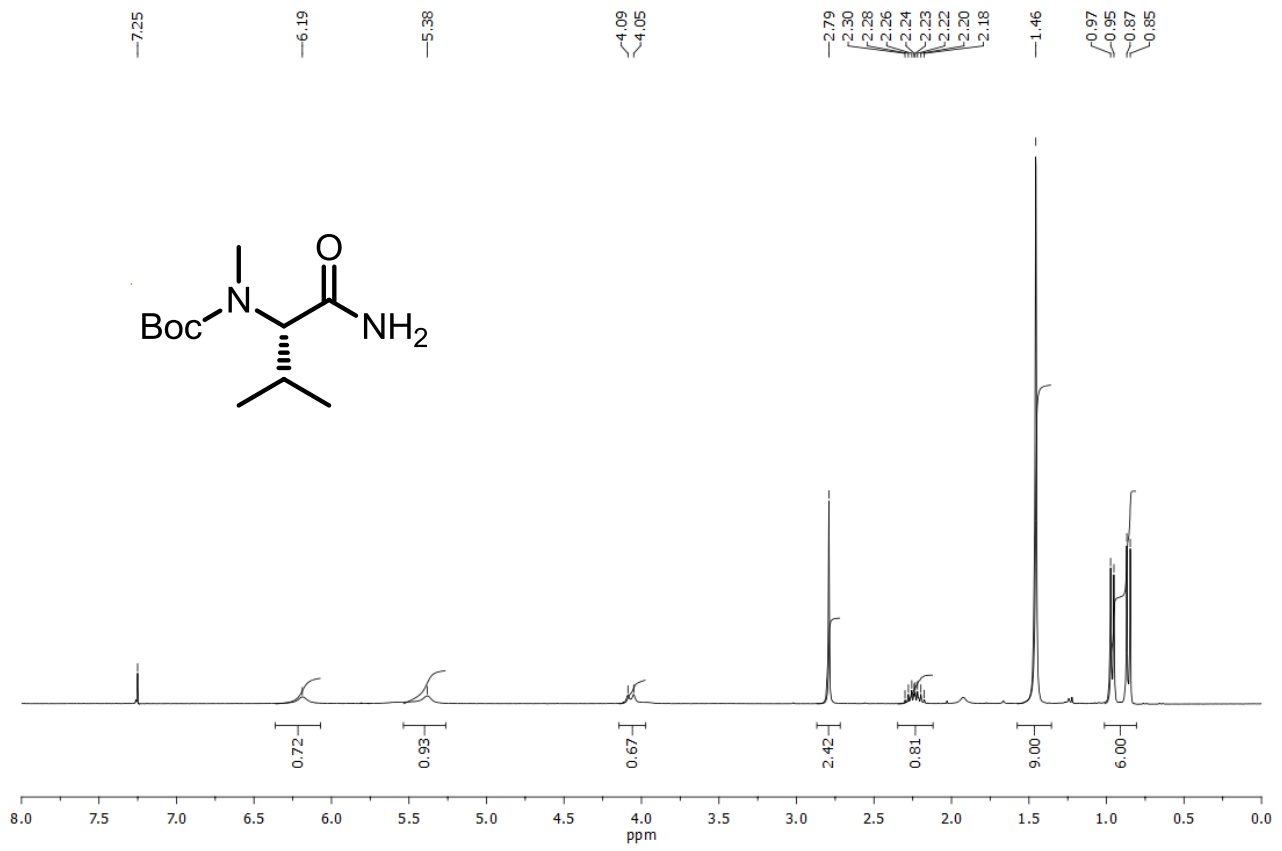

# Compound 17

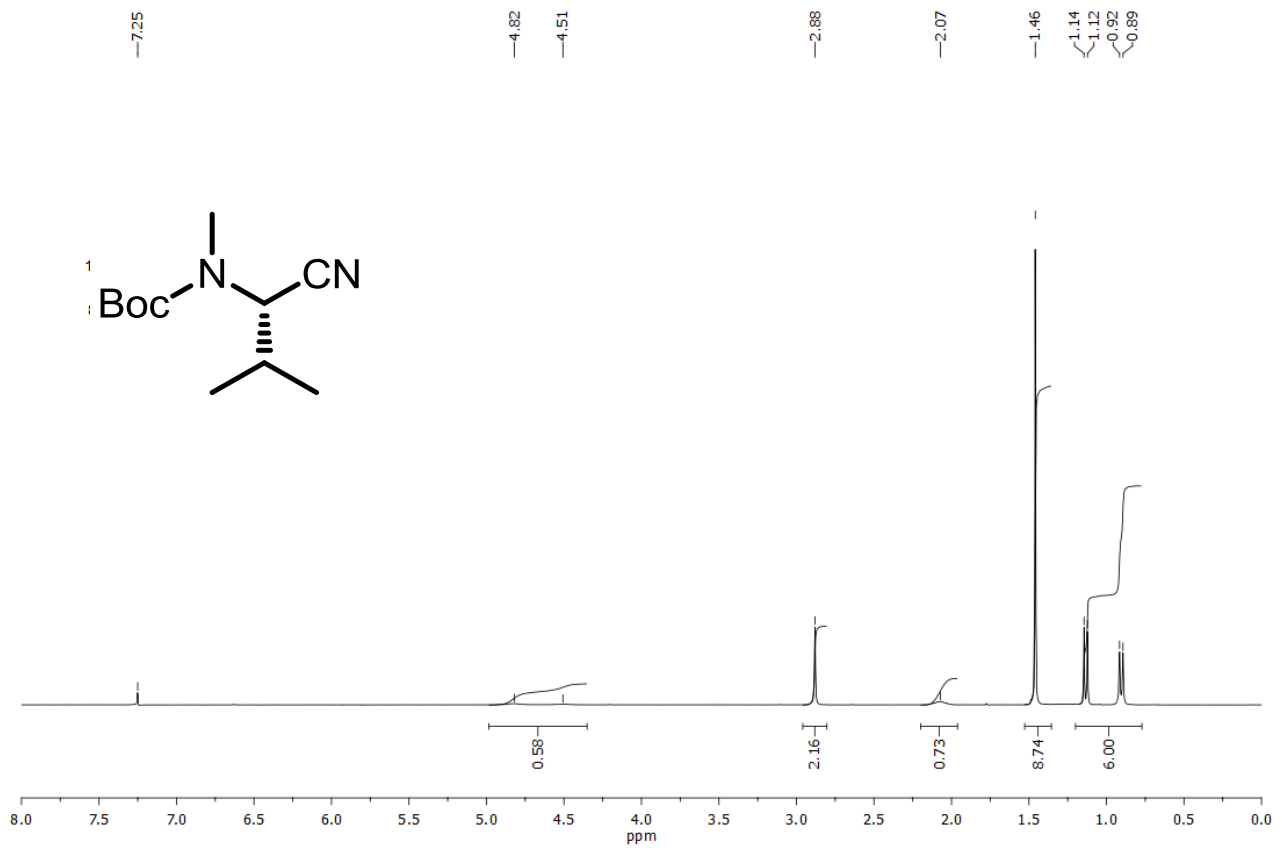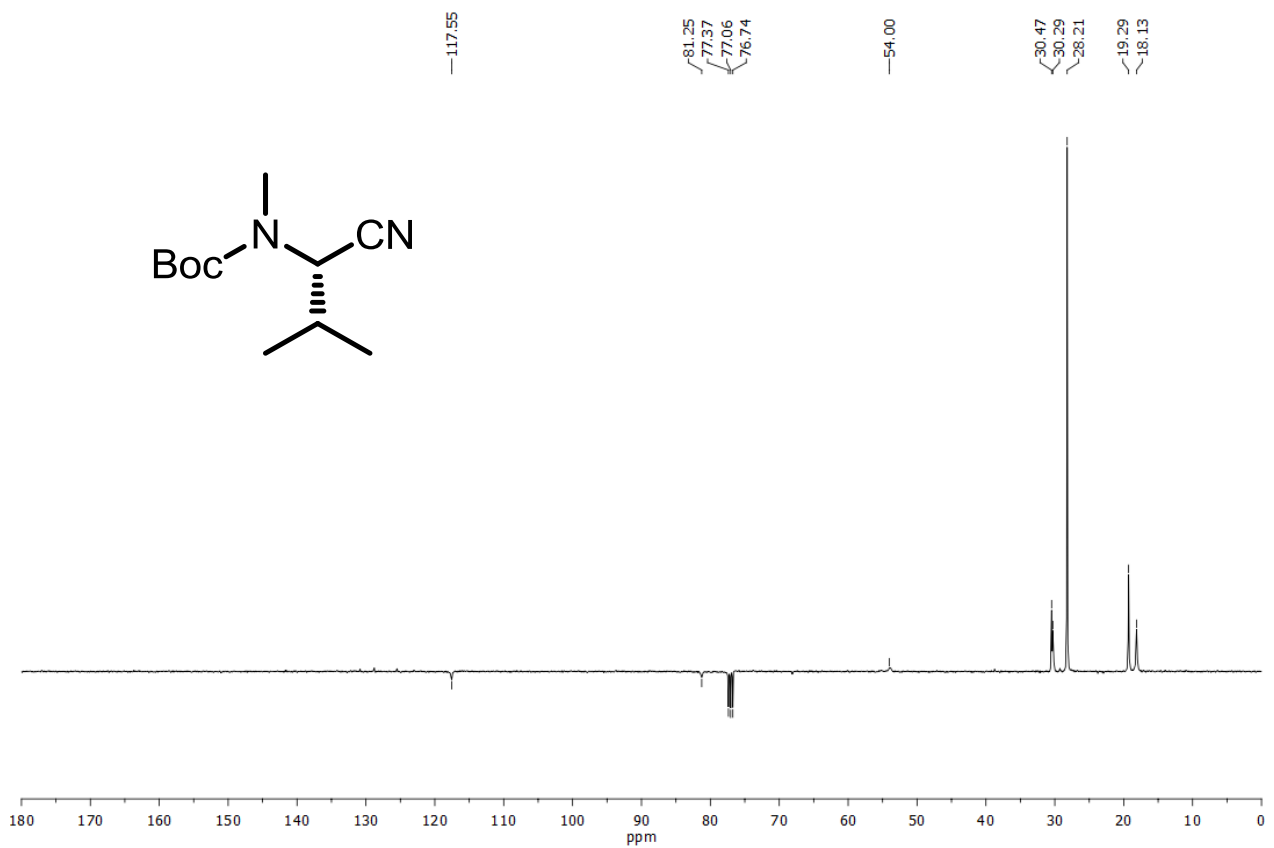

**Compound 18**

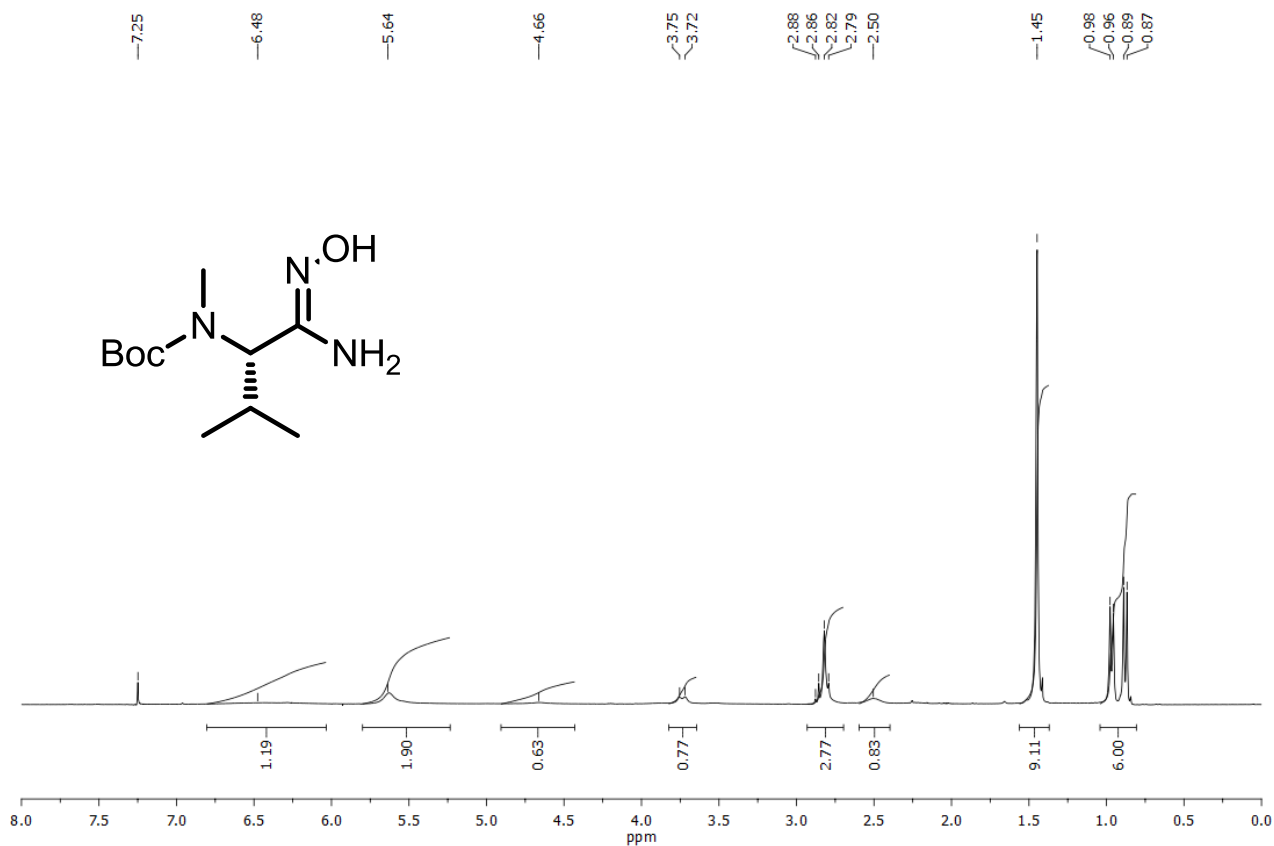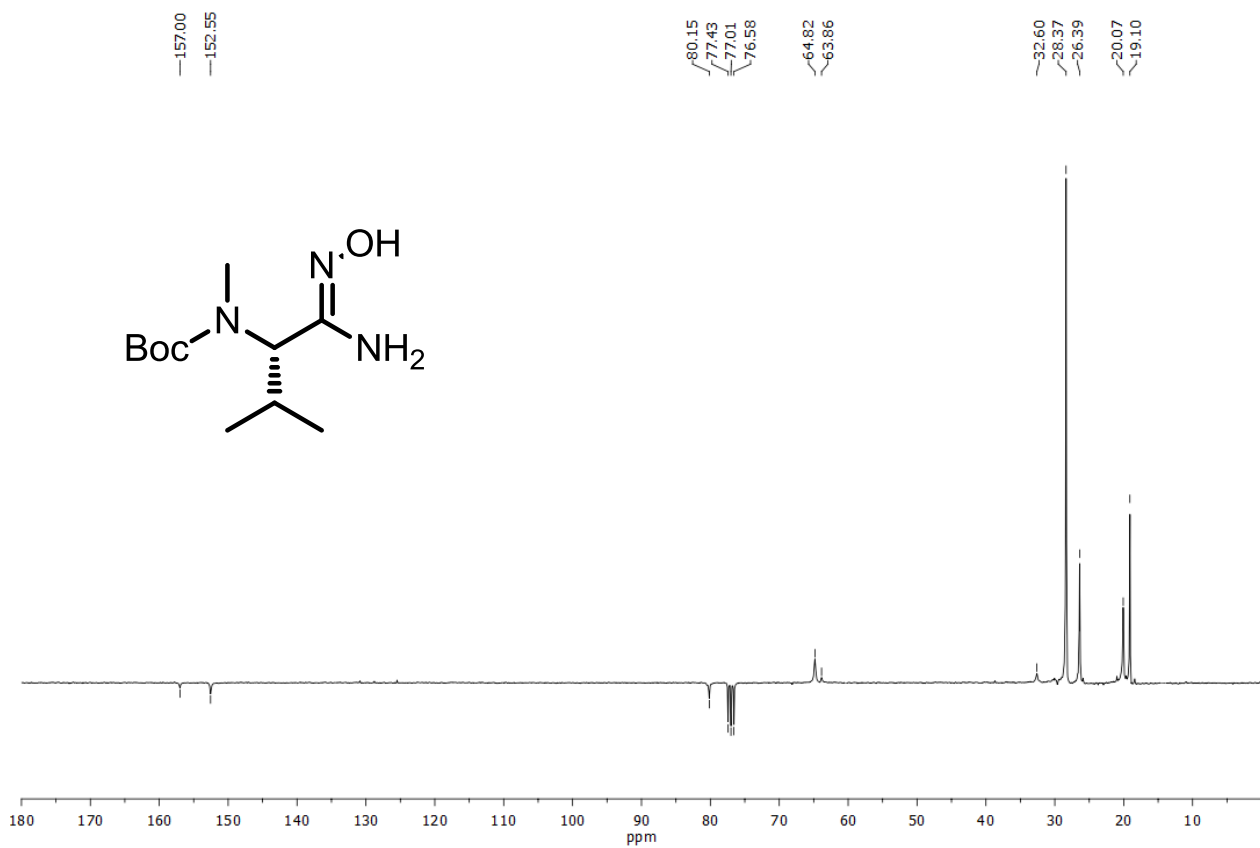

# Compound 19

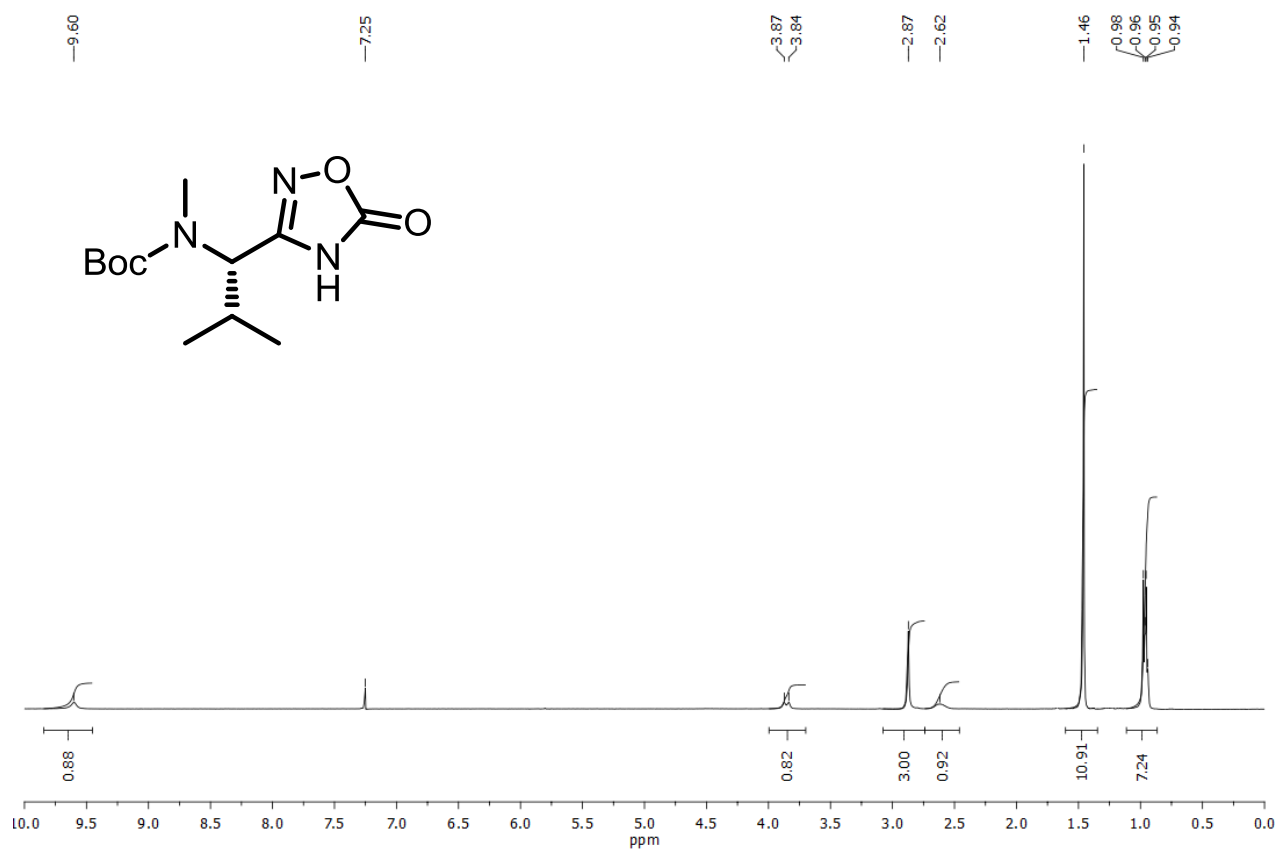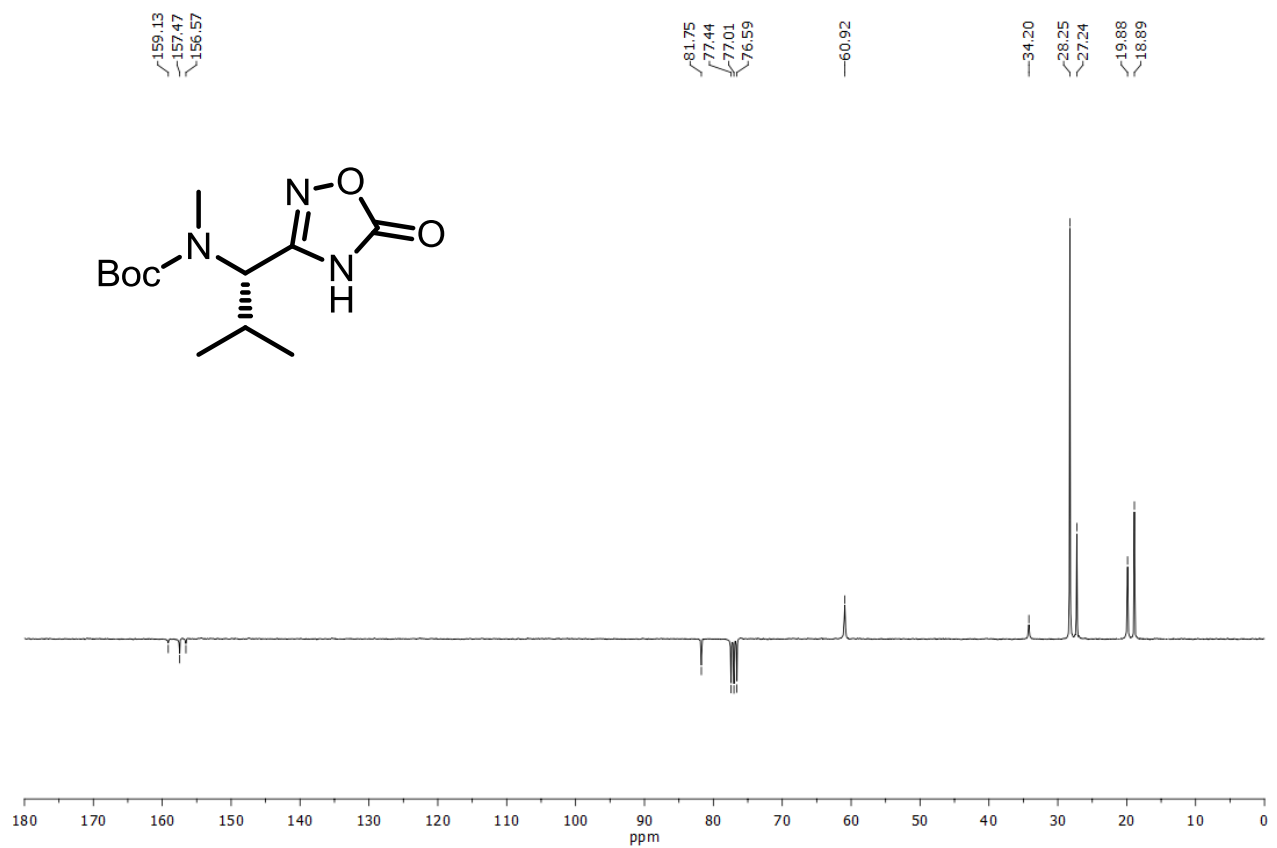

# Compound 20

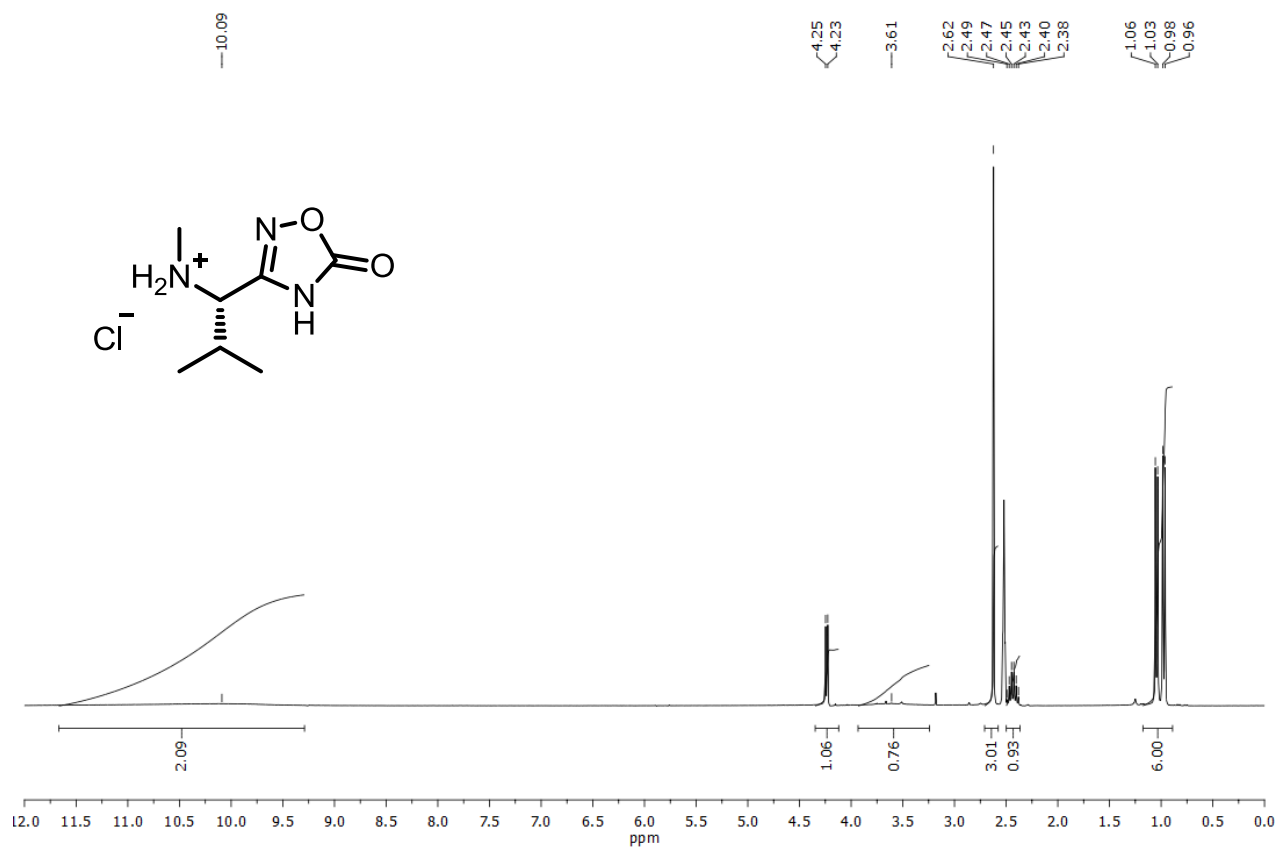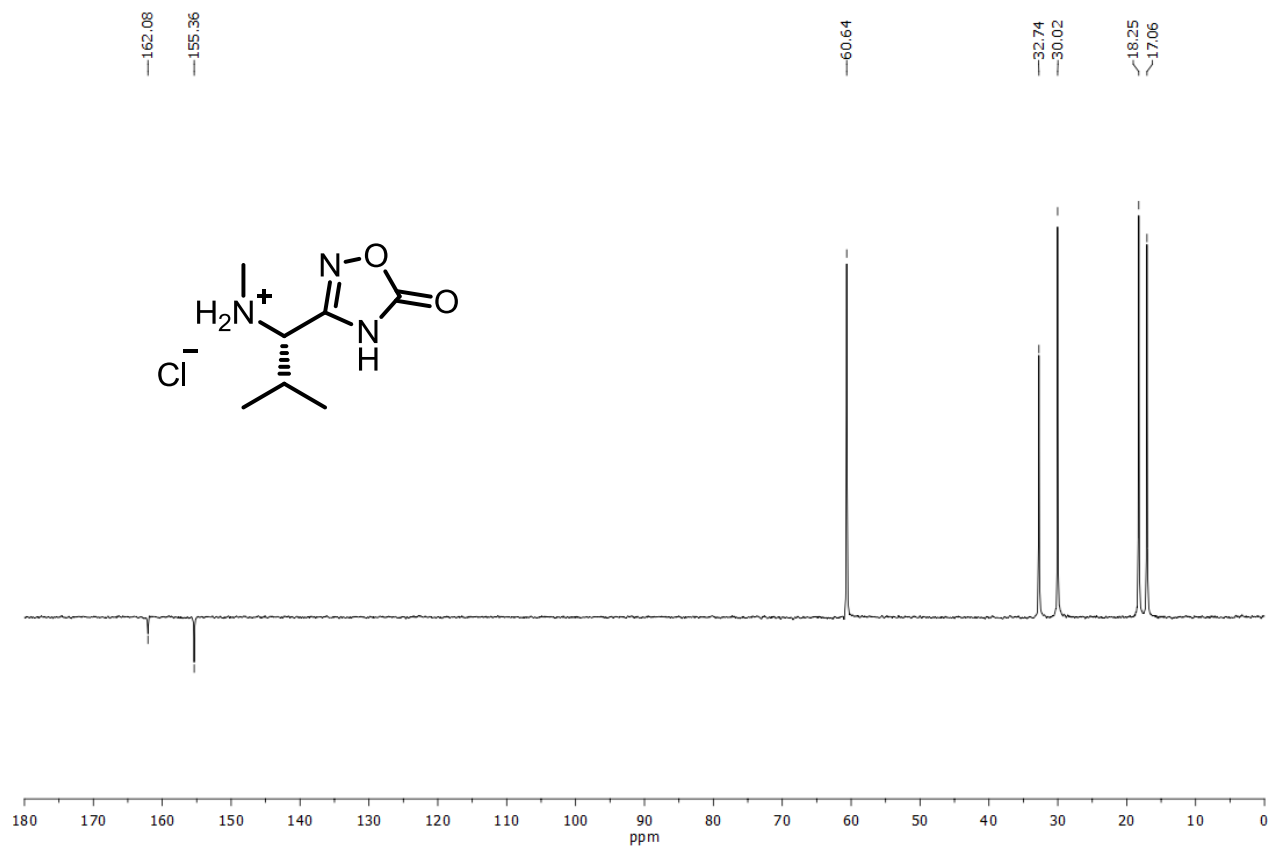

# Compound 21

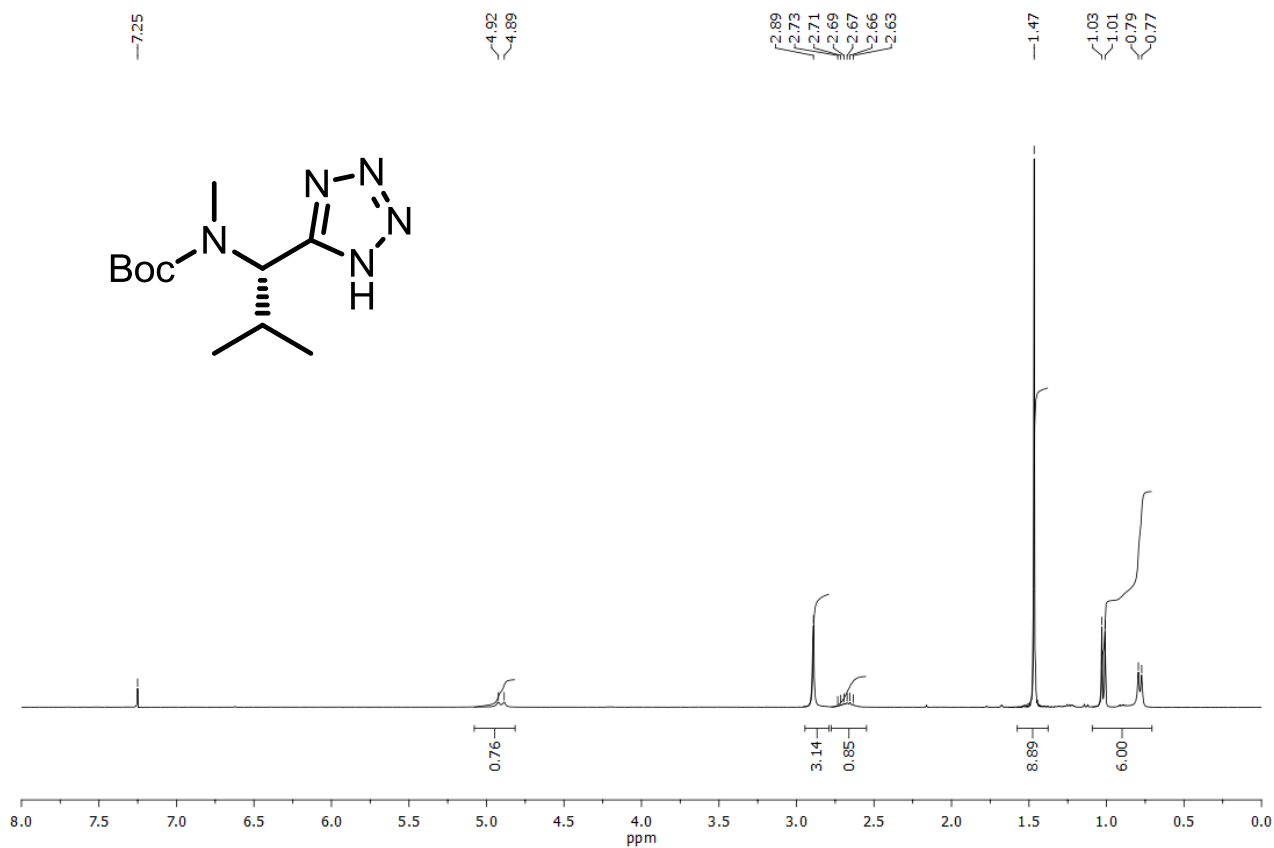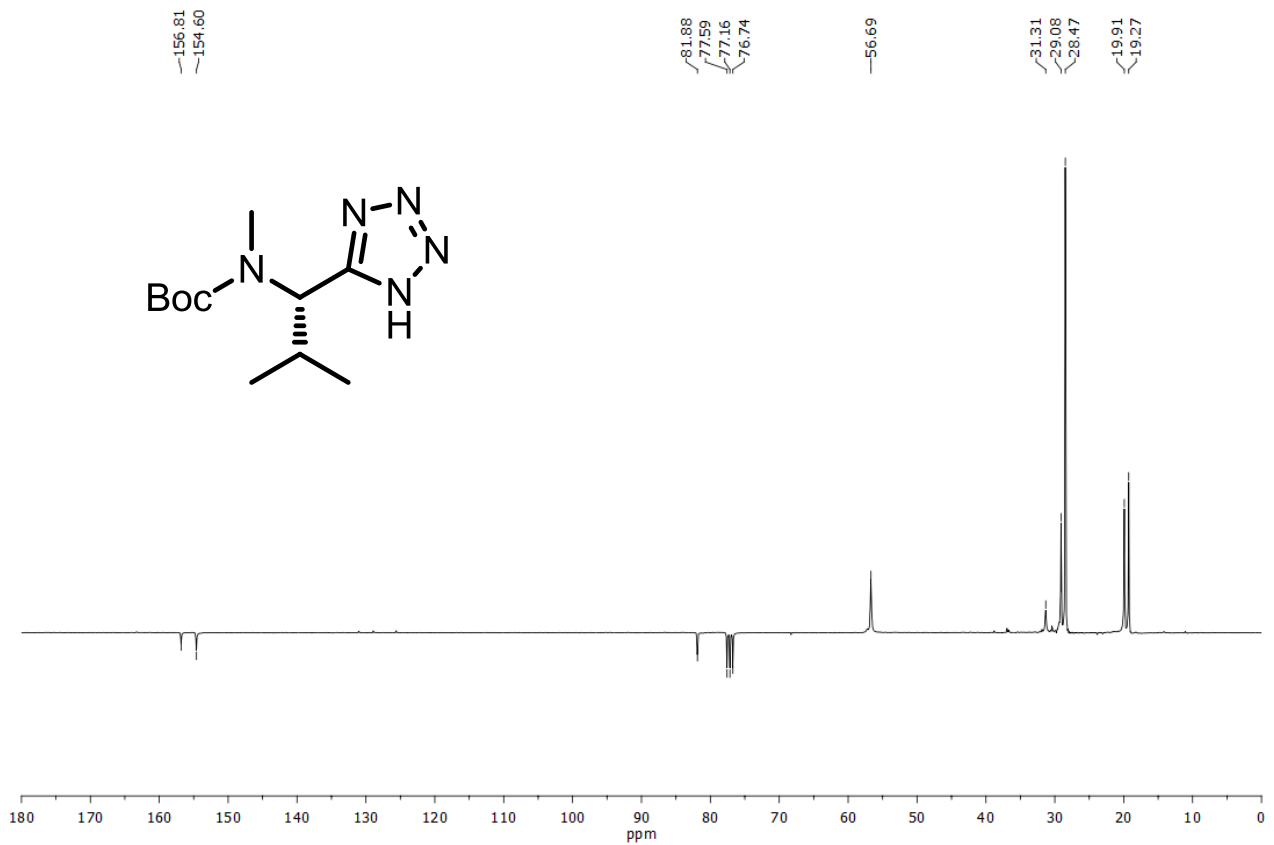

**Compound 22**

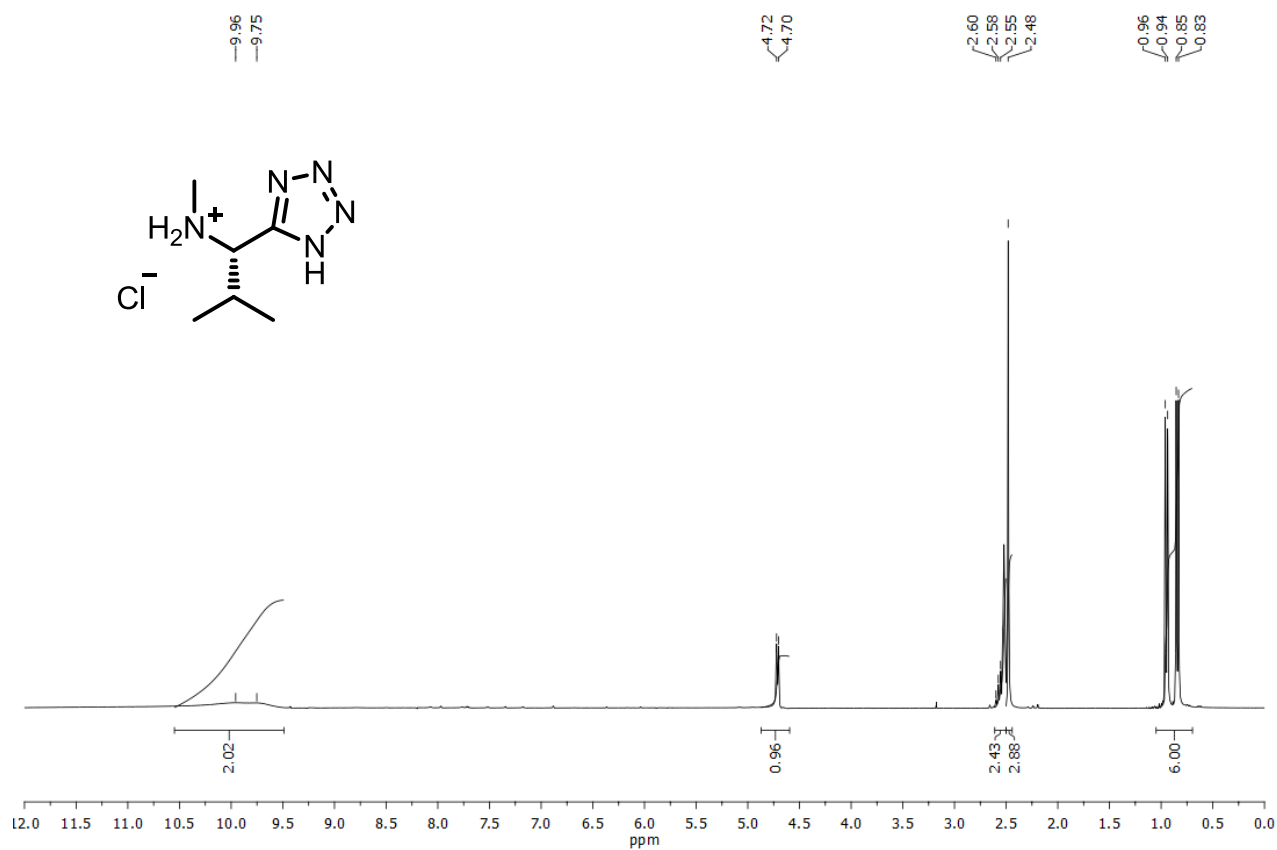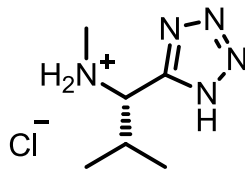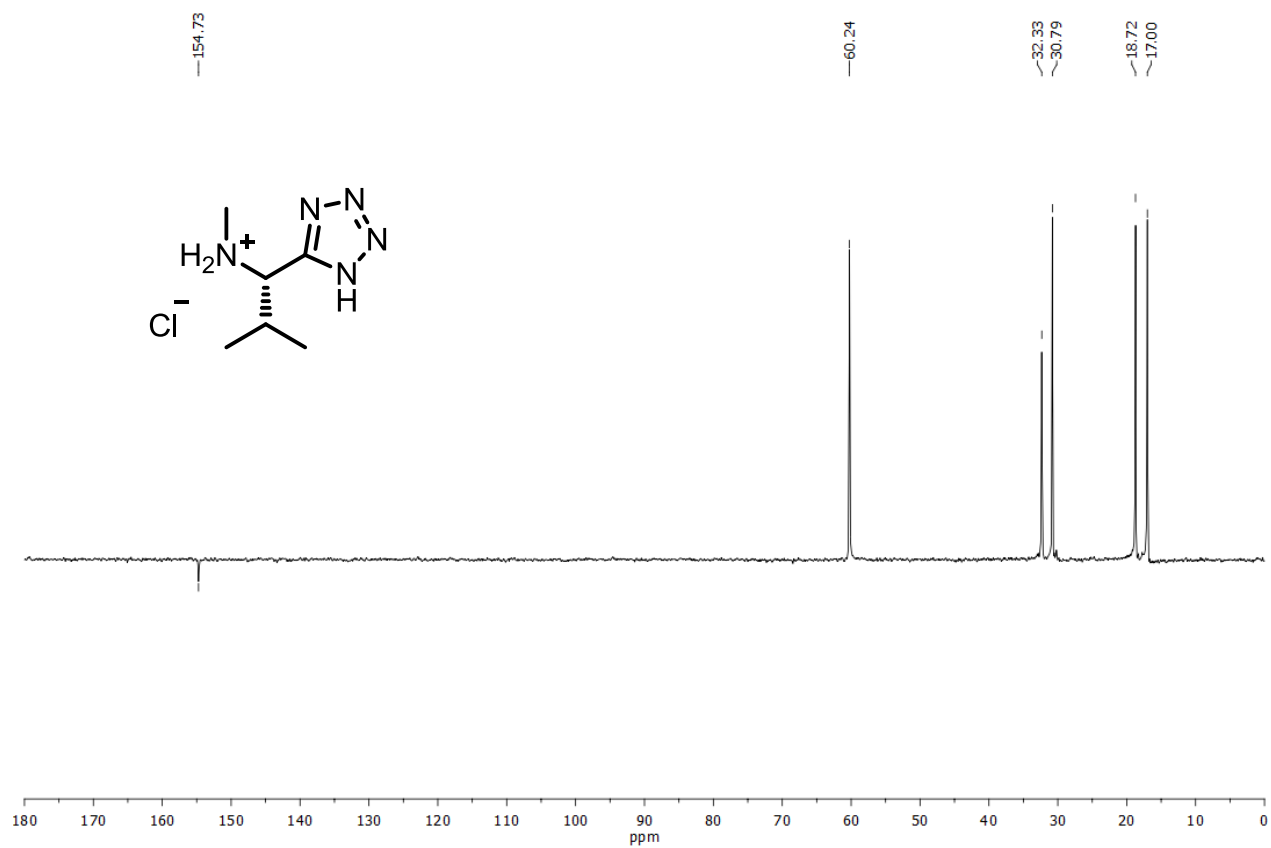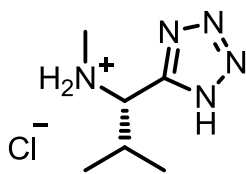

# Compound 23

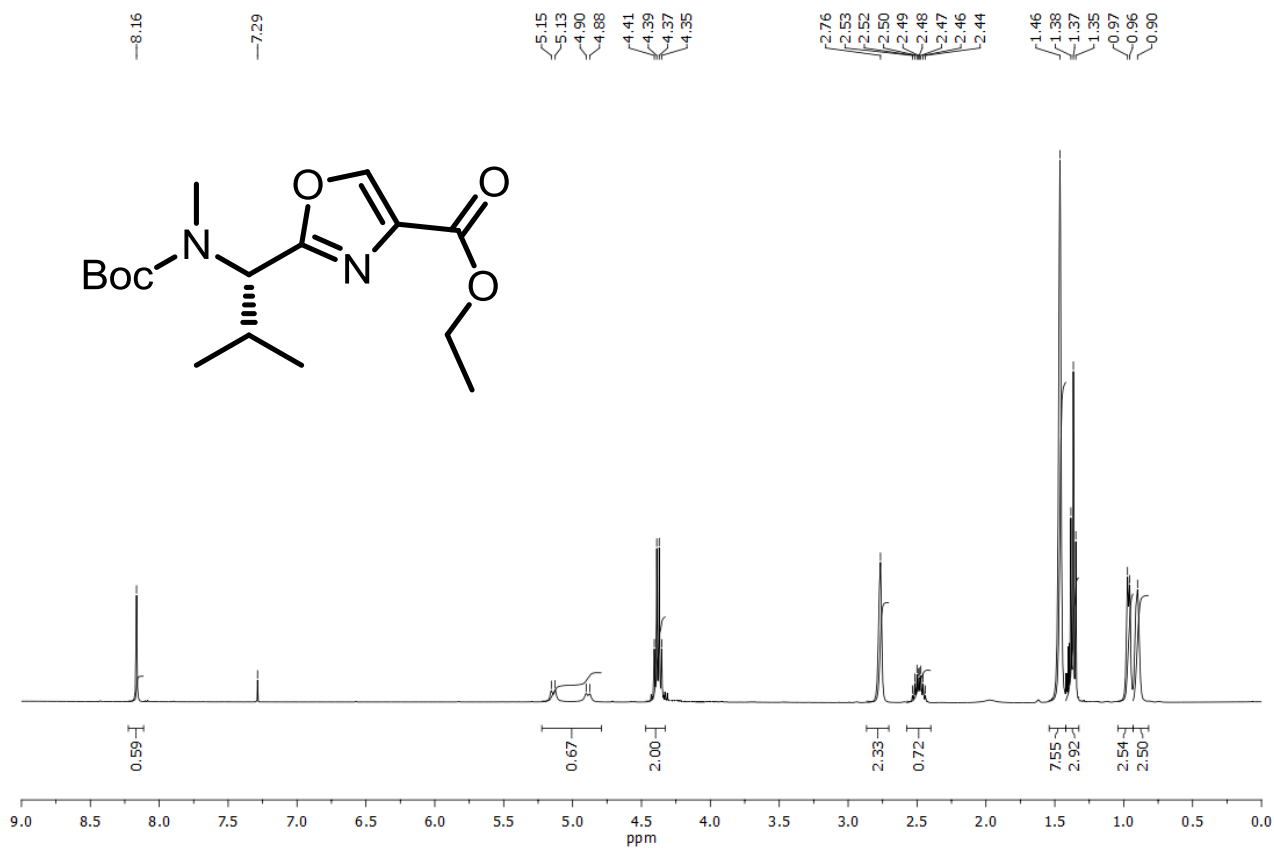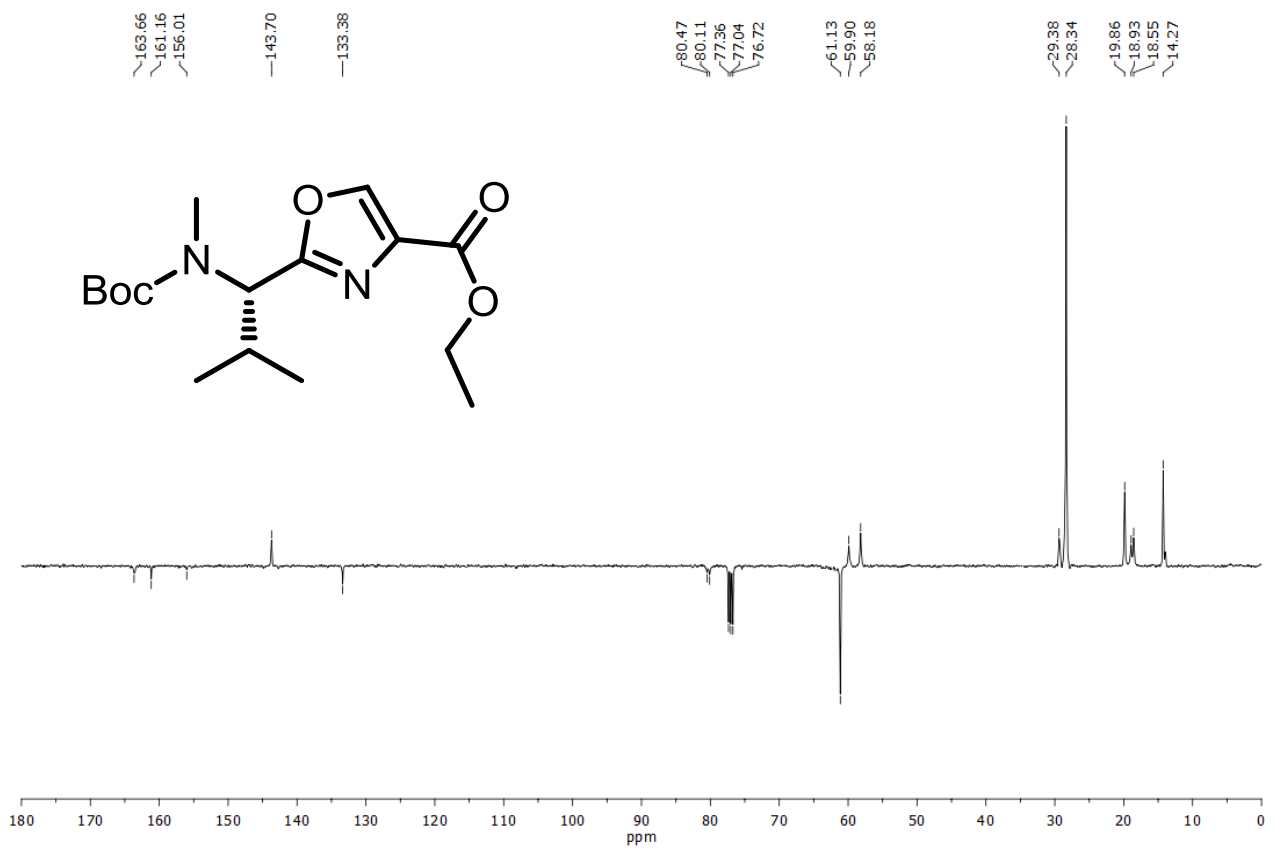



# Compound 24

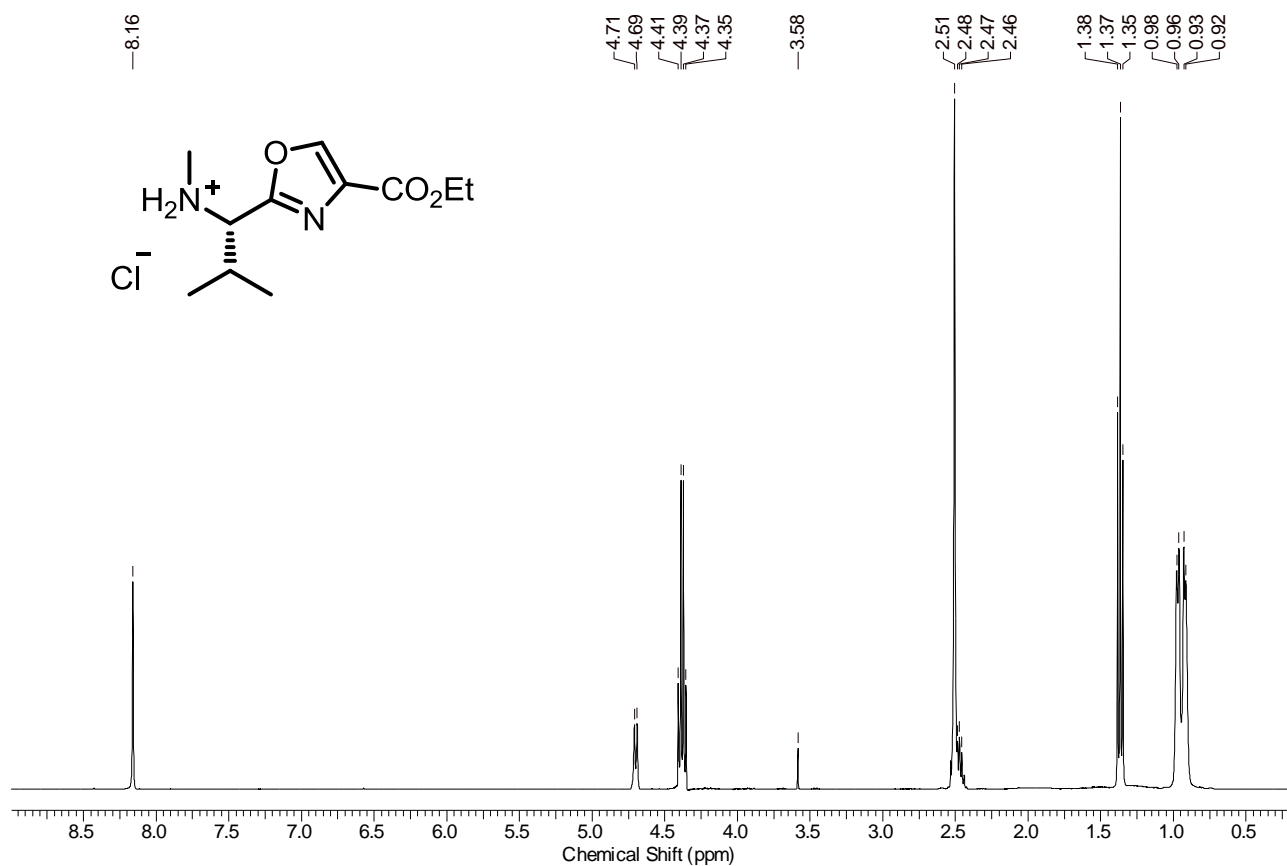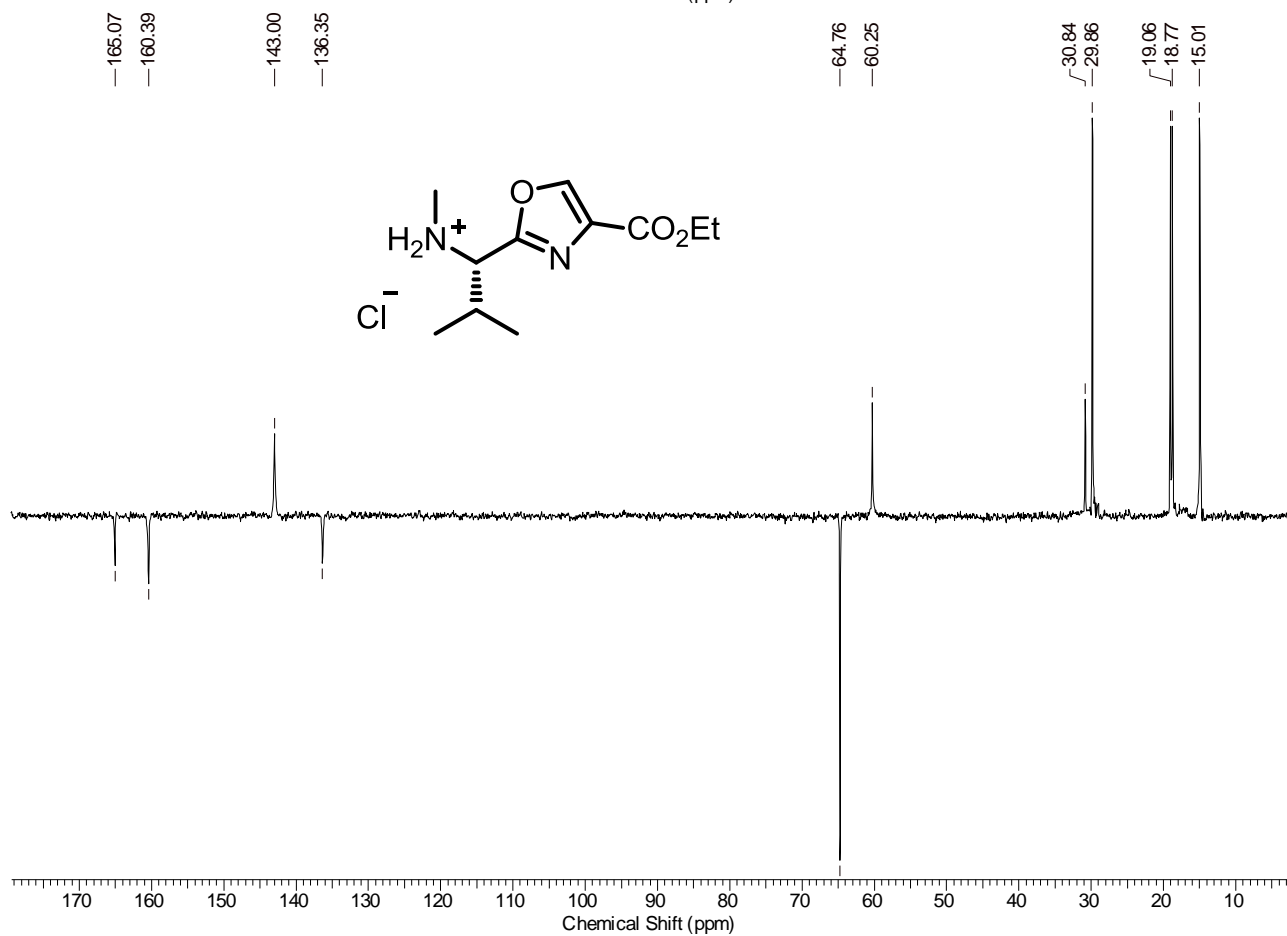

# Compound 25

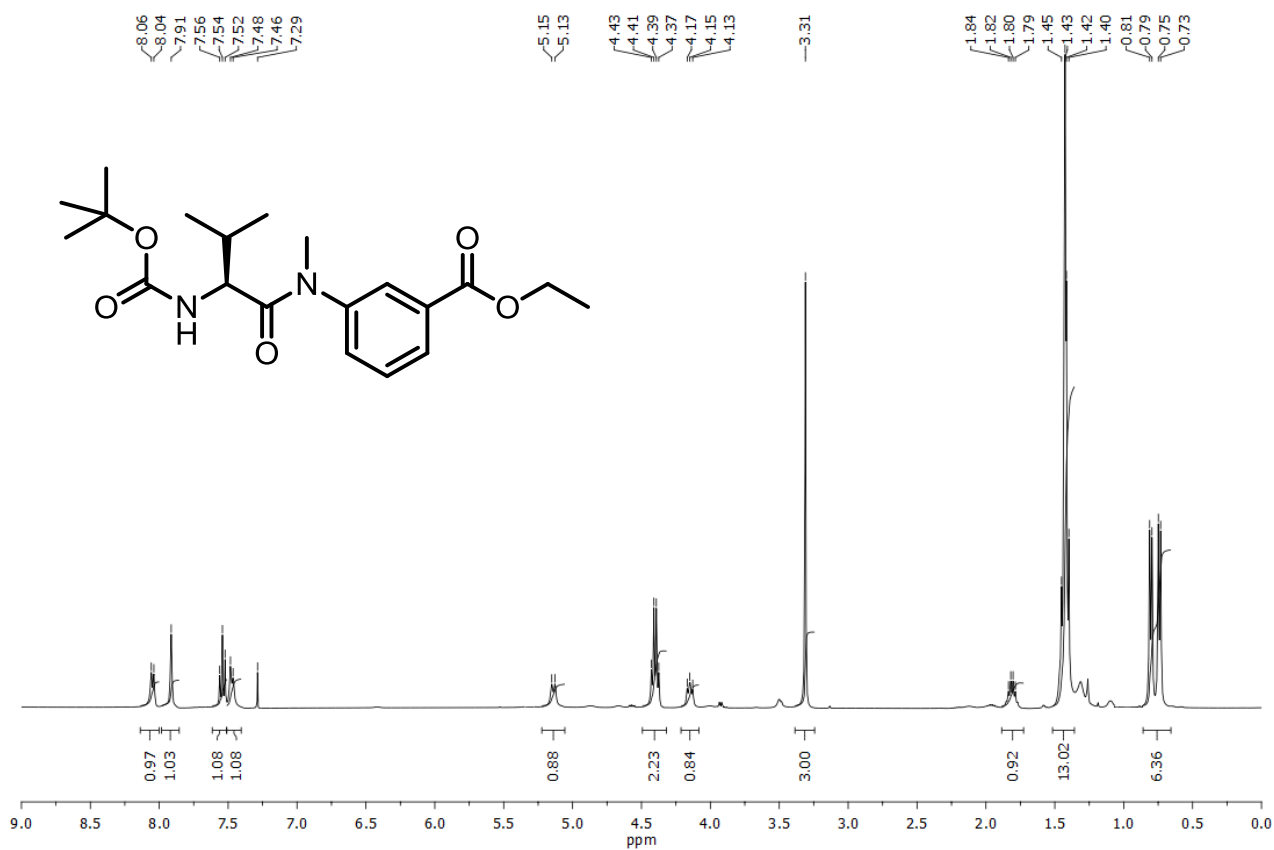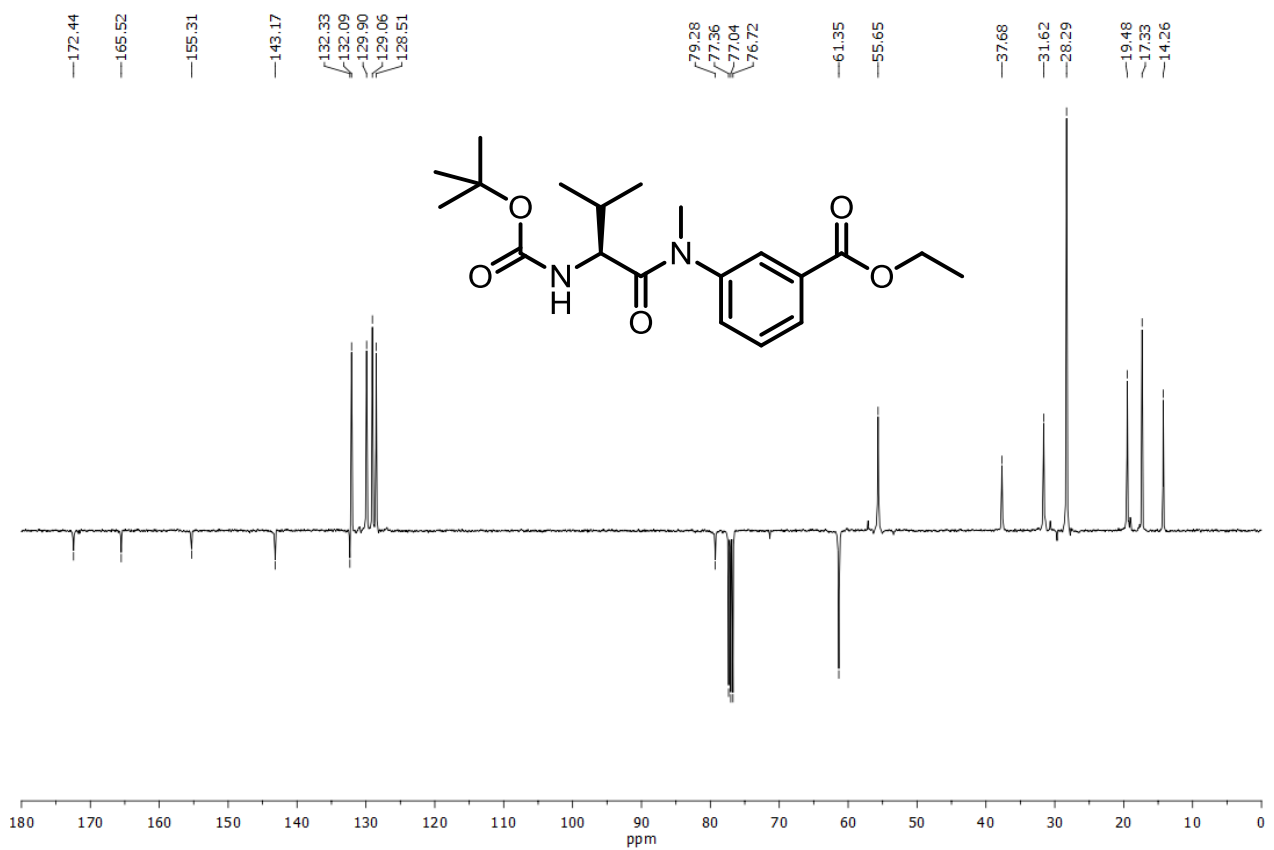

# Compound 26

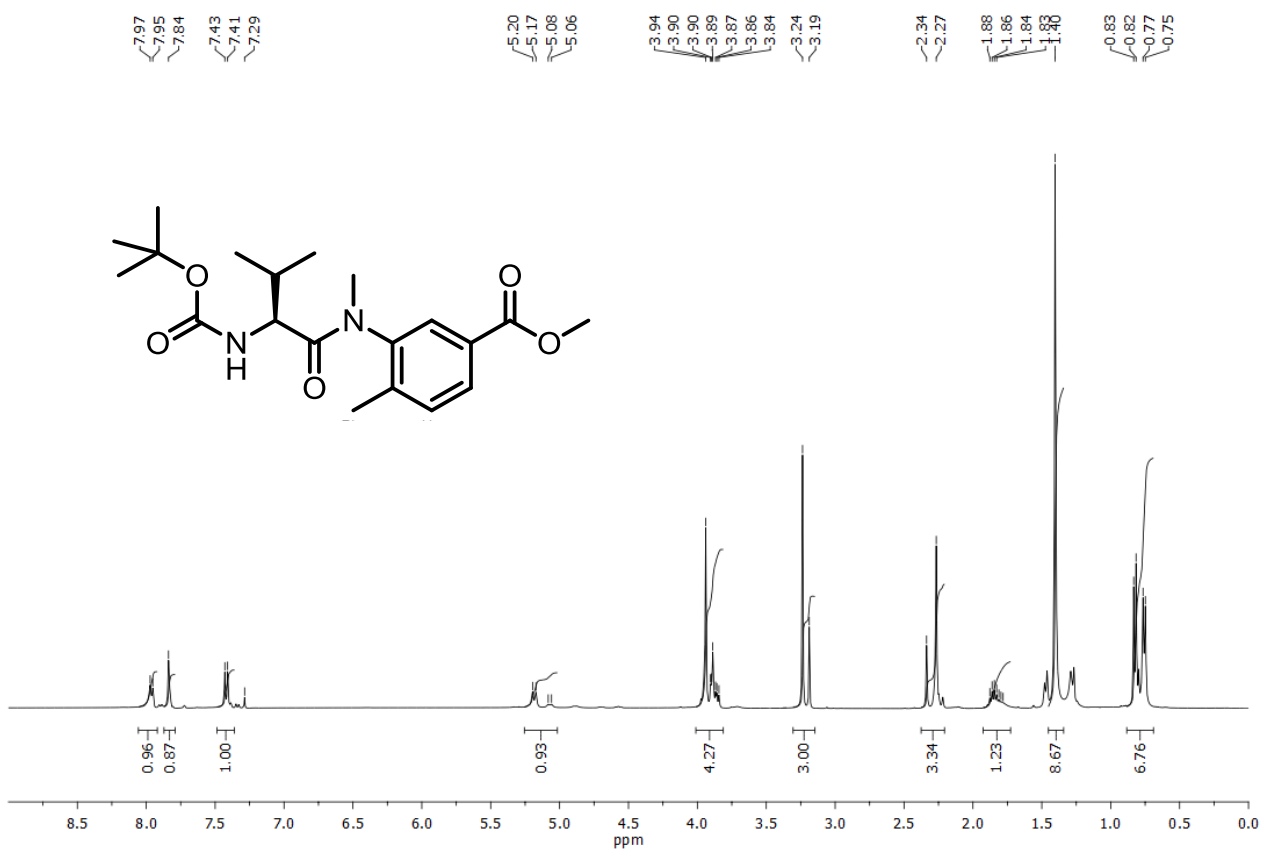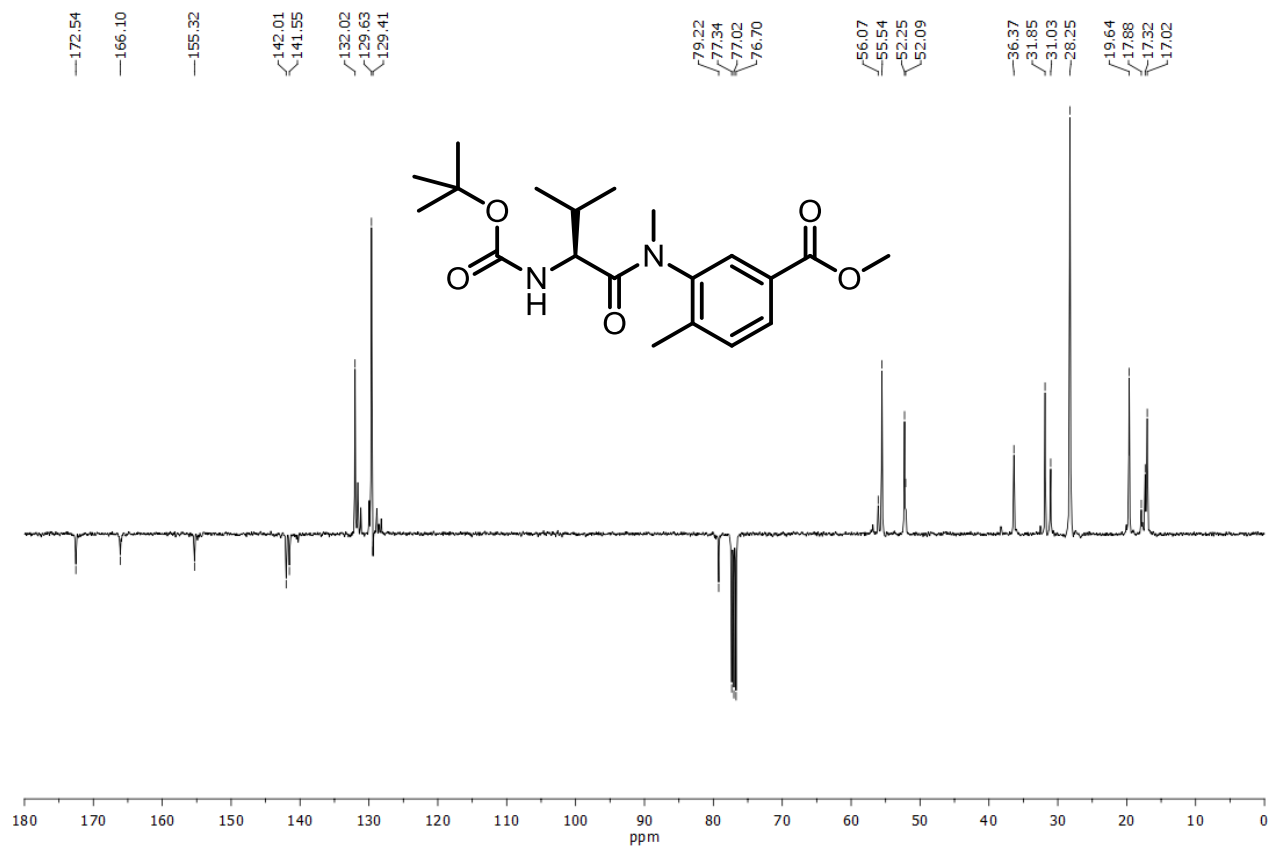

**Compound 27**

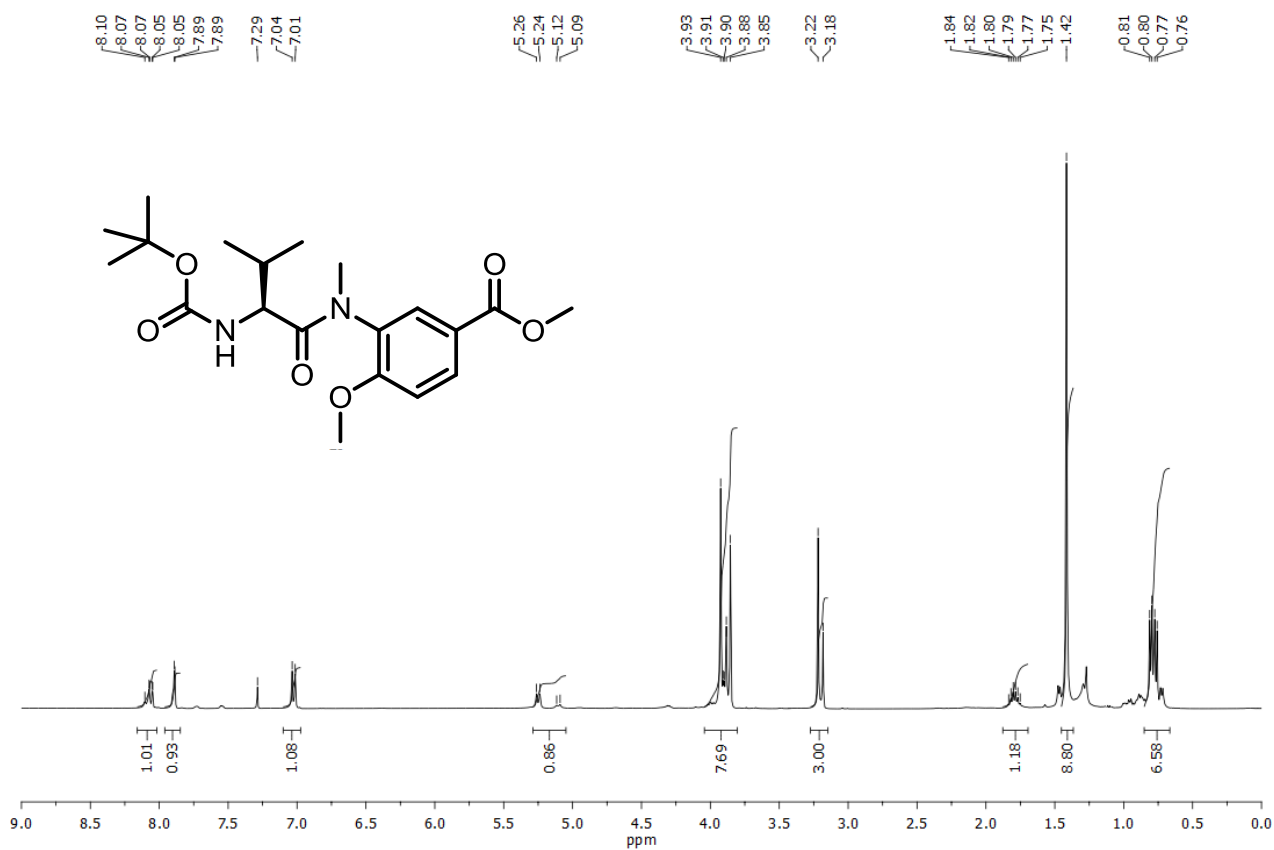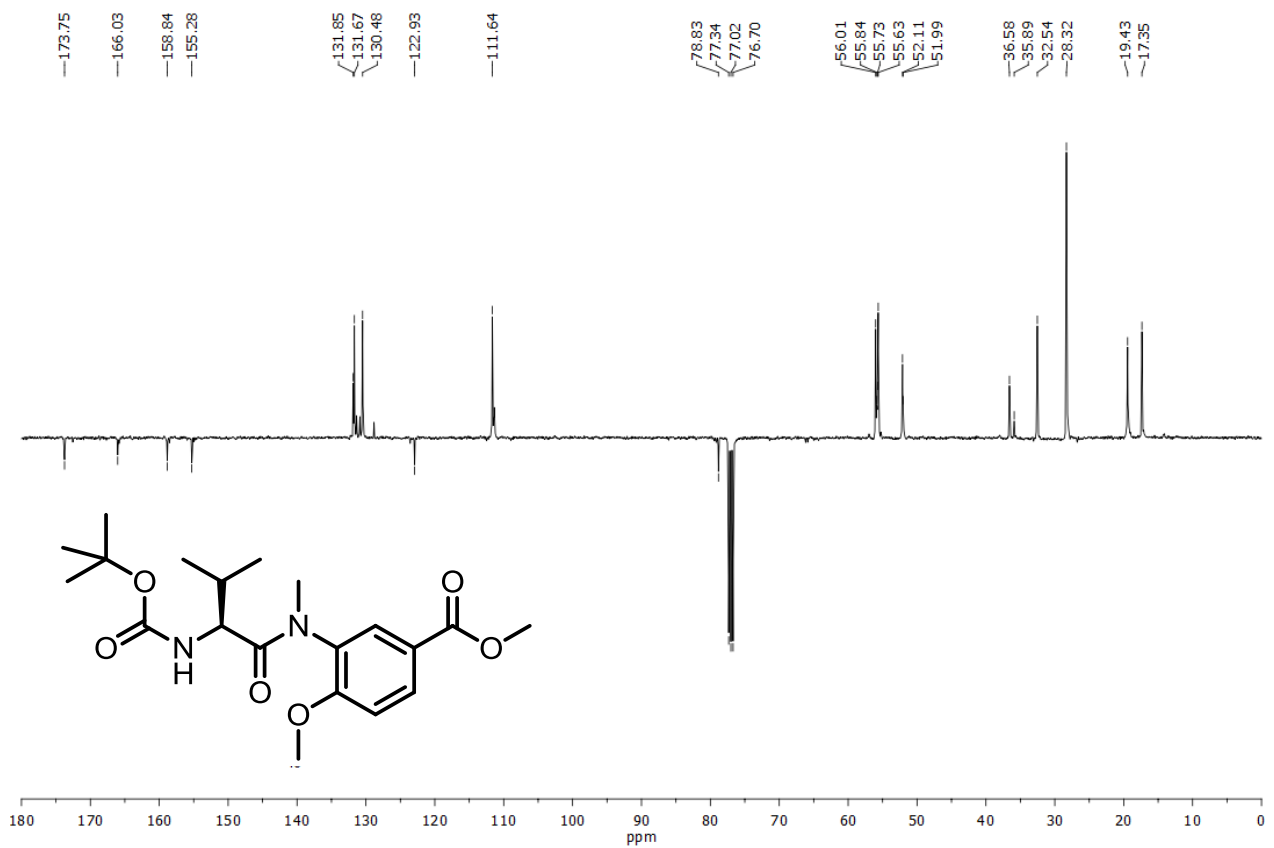

# Compound 31

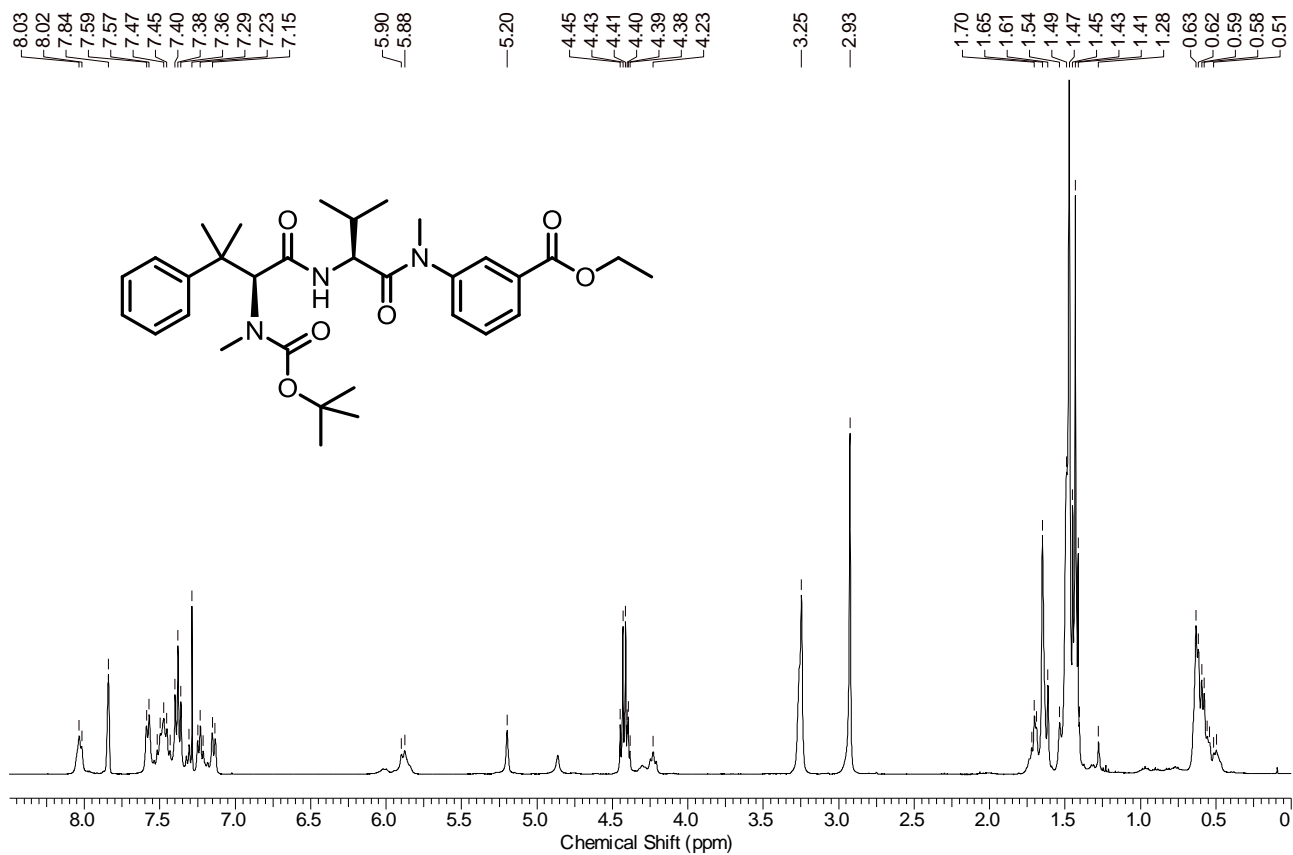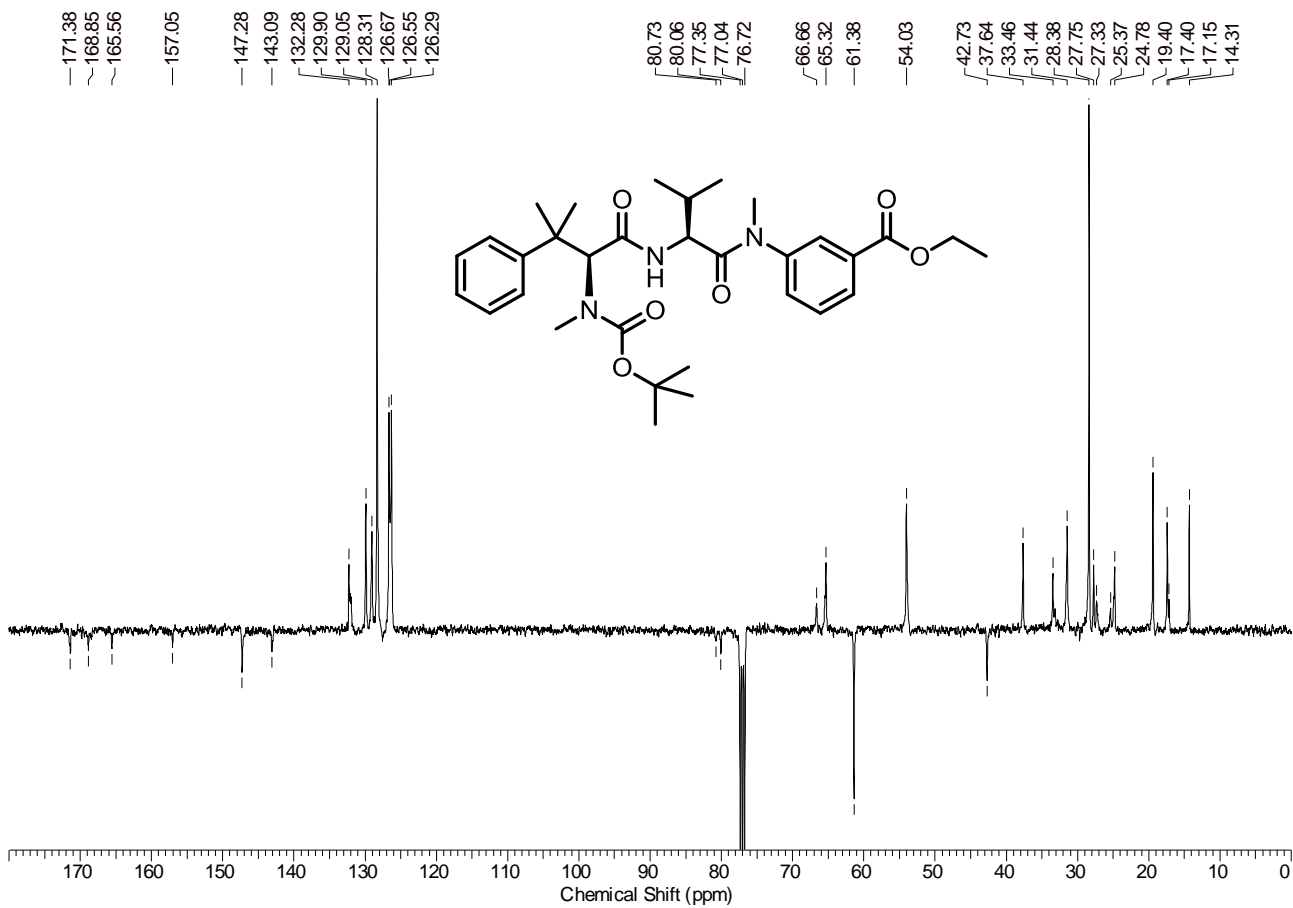

# Compound 32

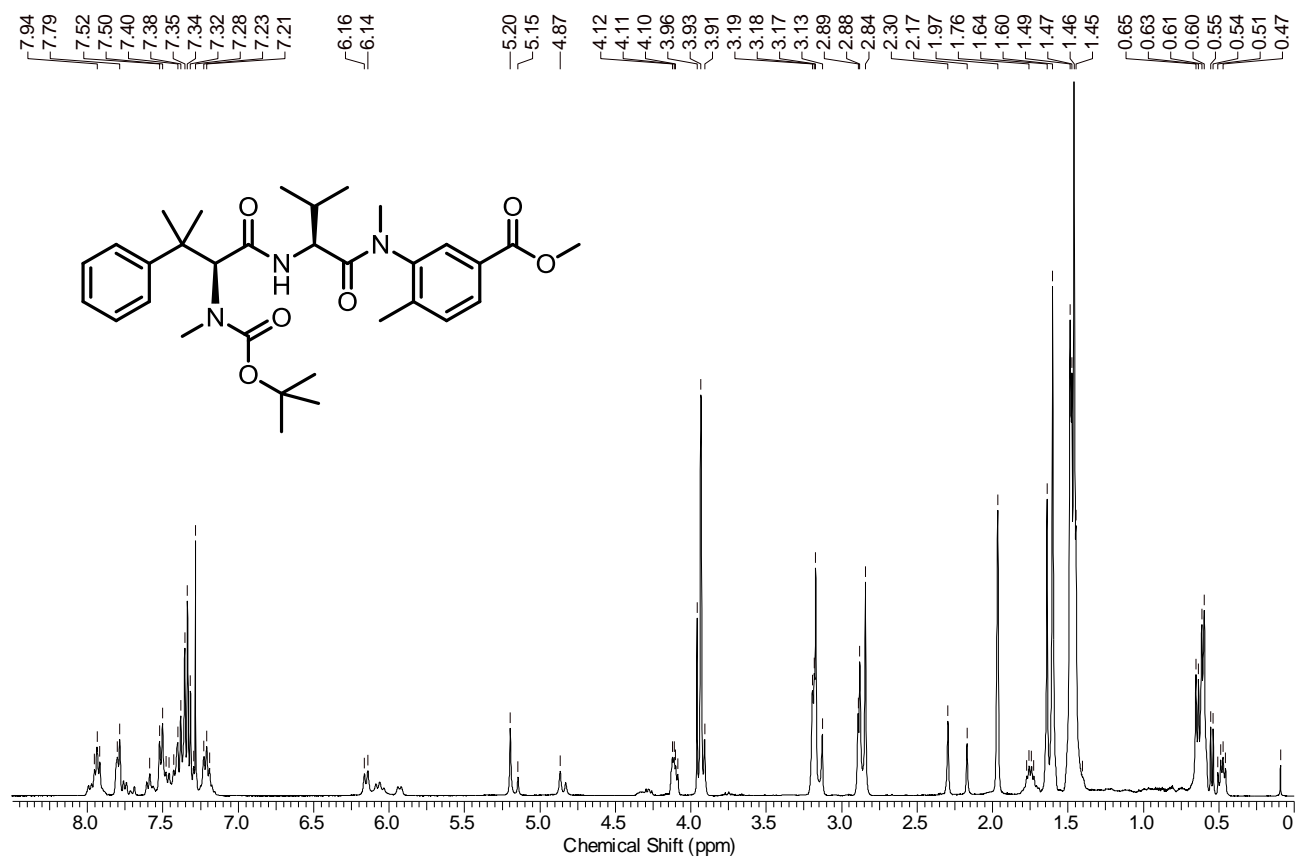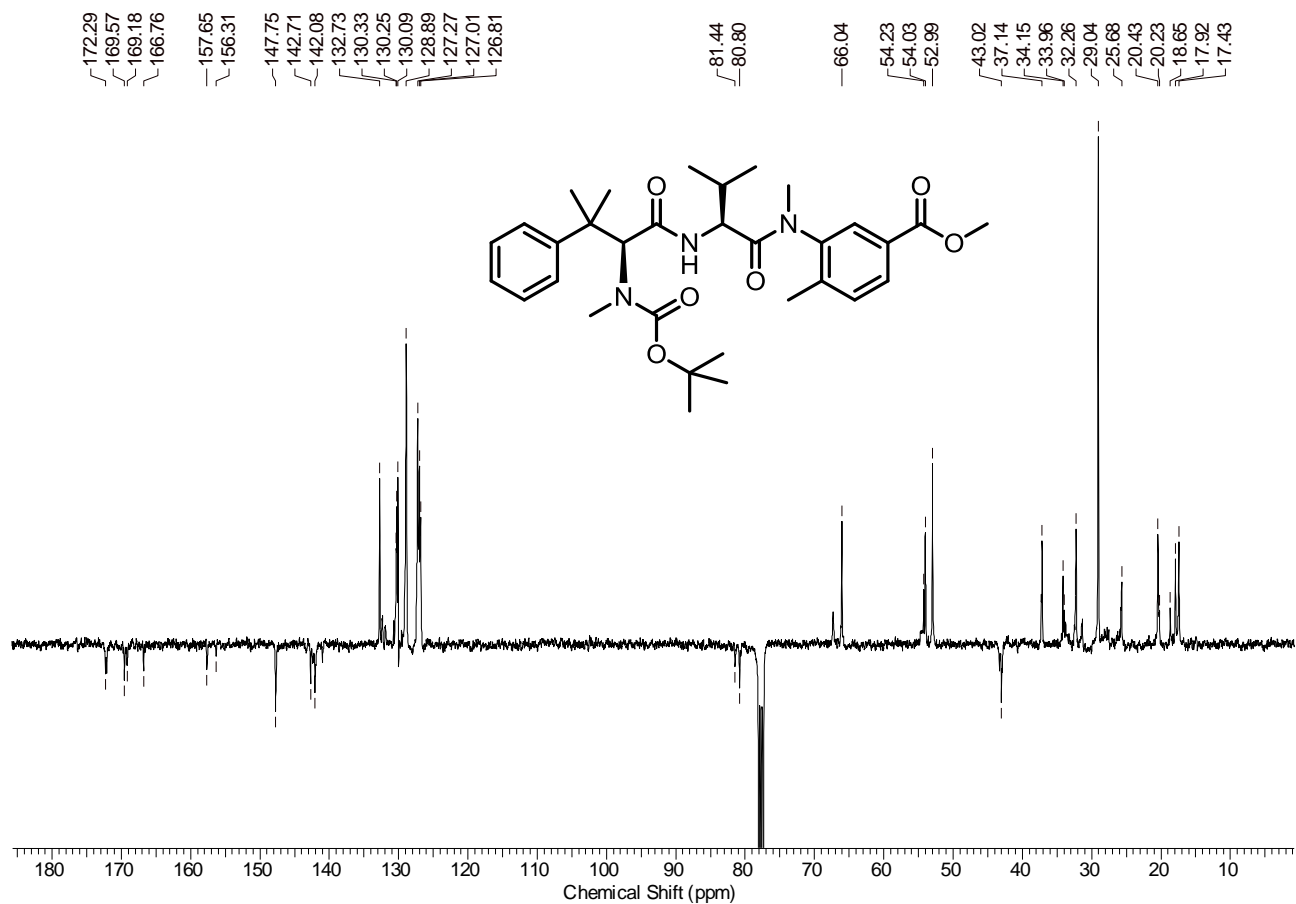

**Compound 33**

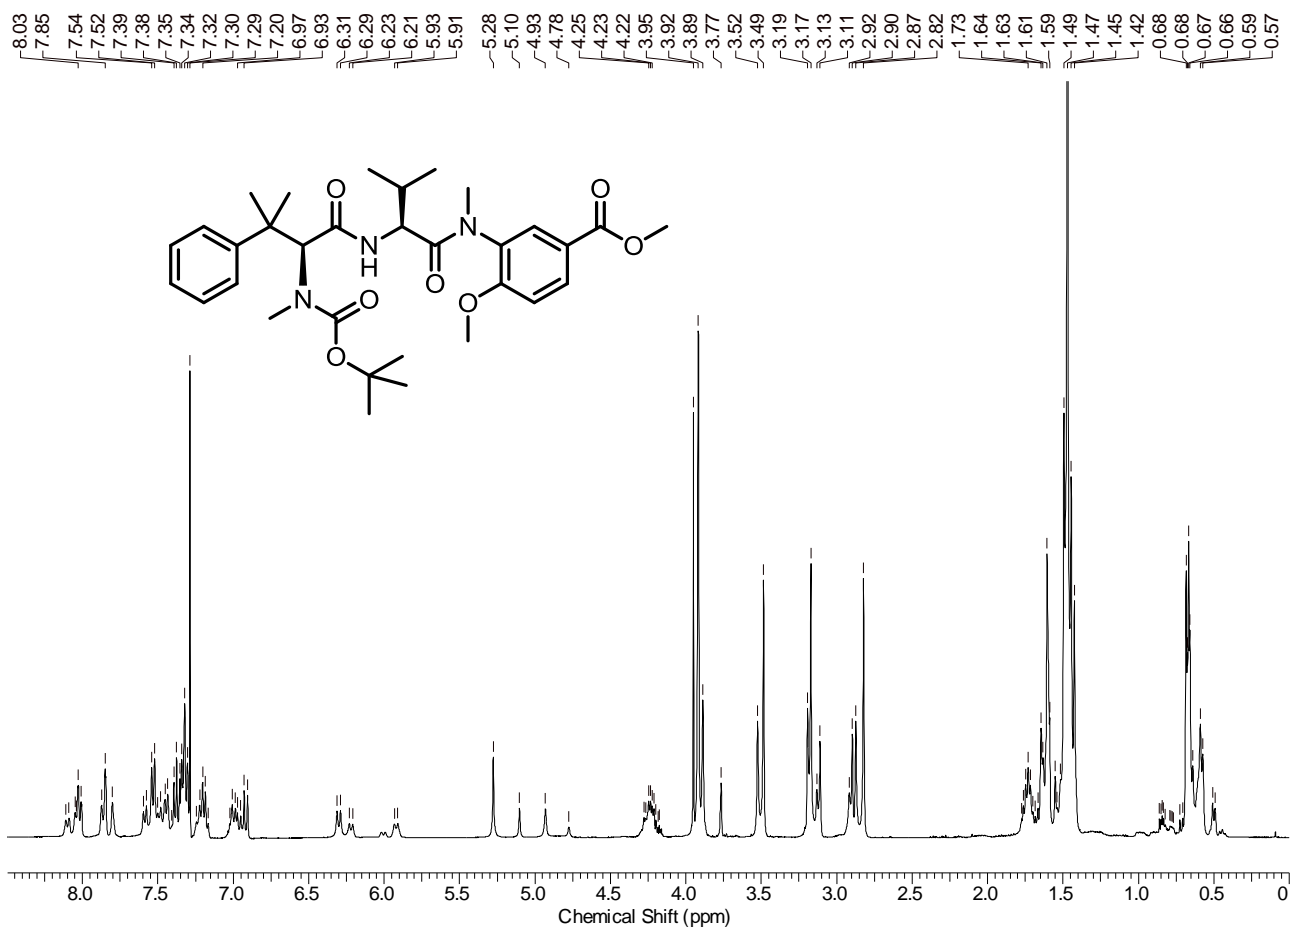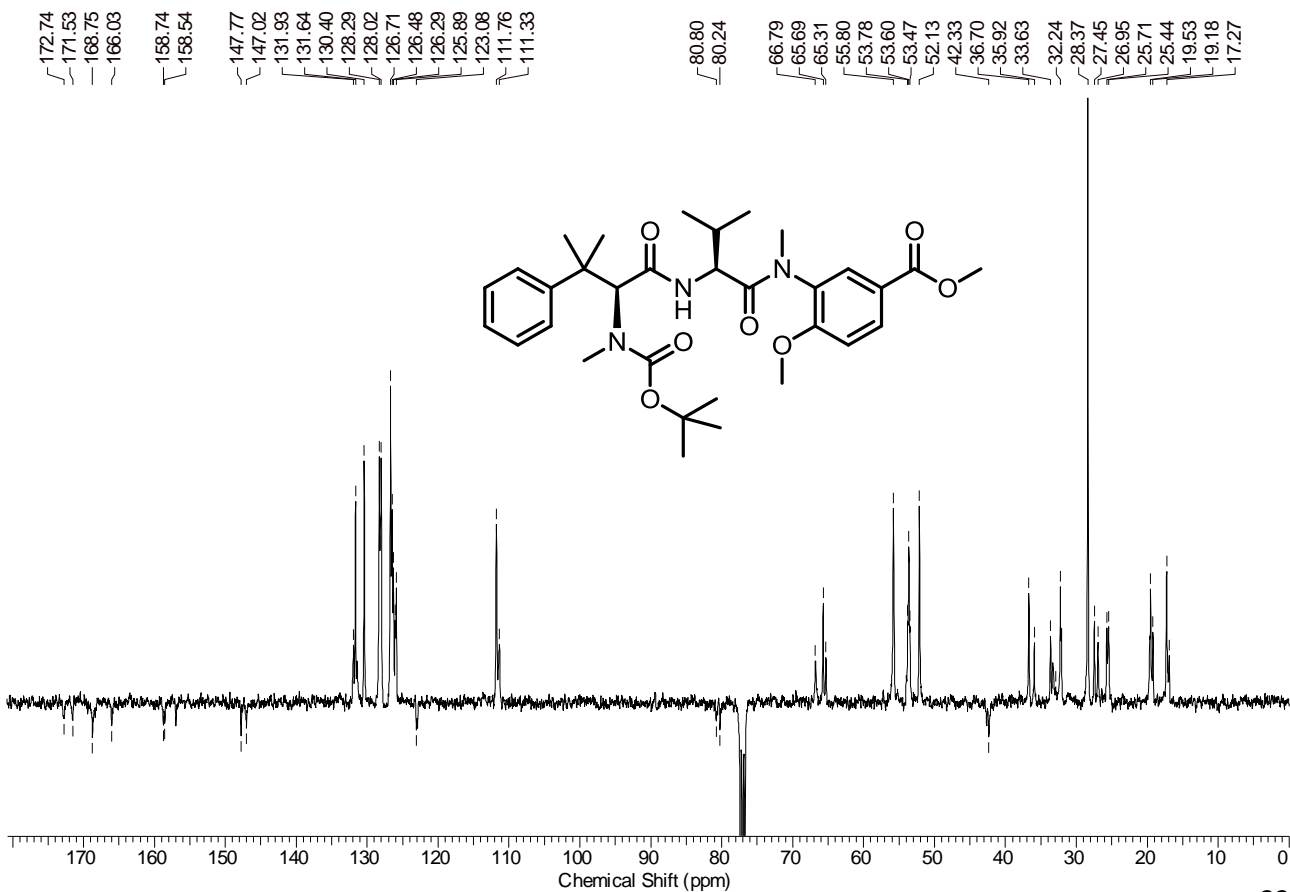

### Compound 3

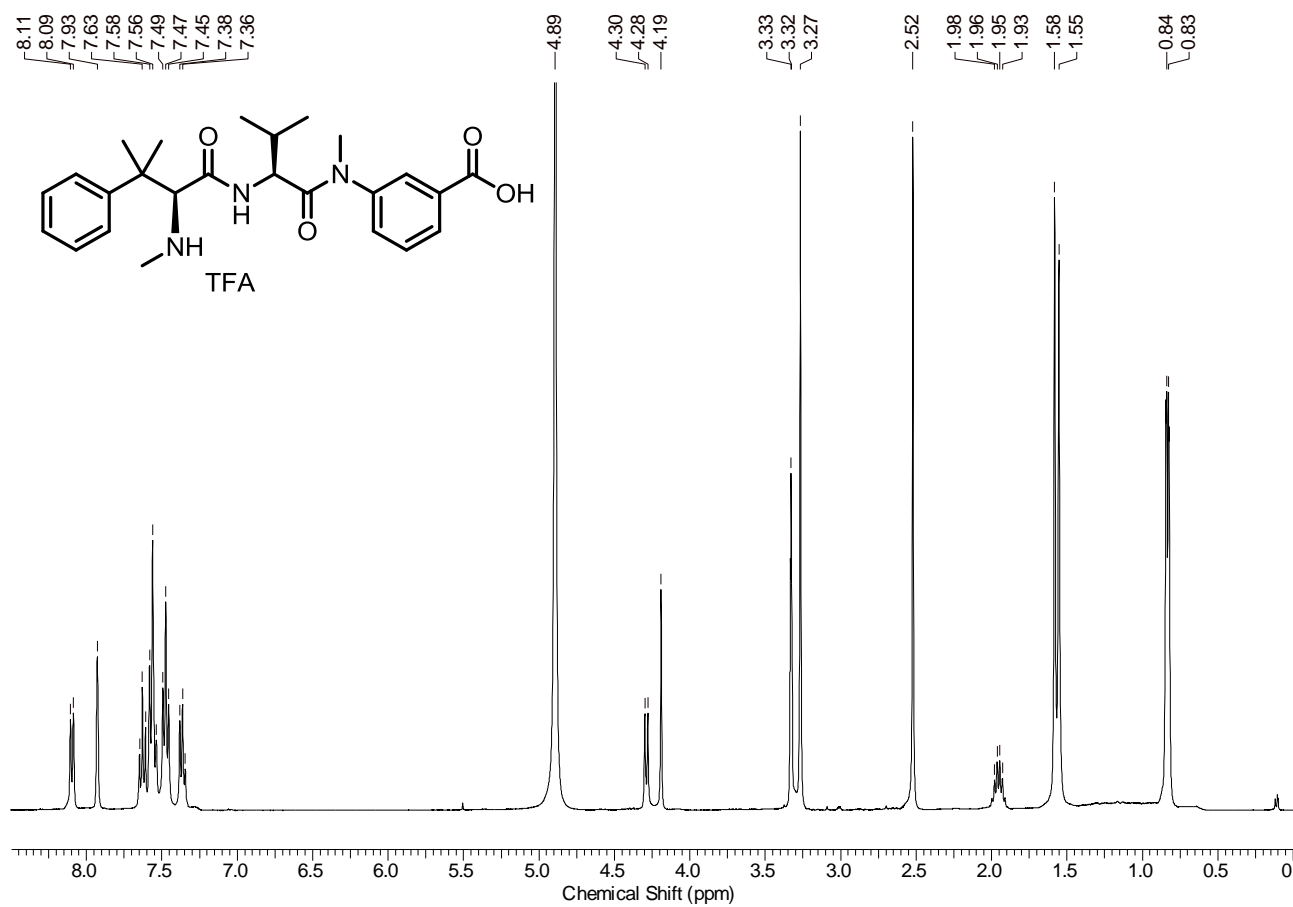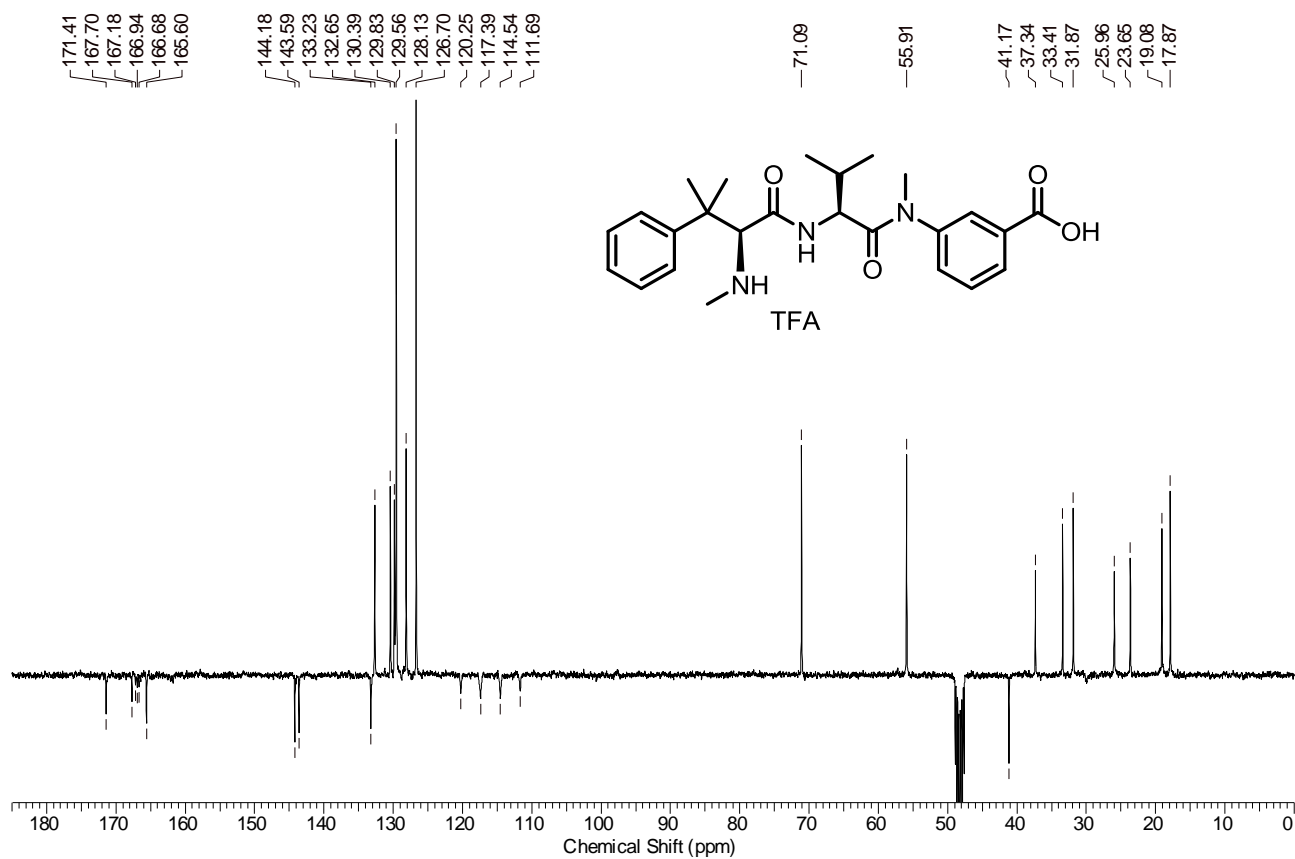



# Compound 4

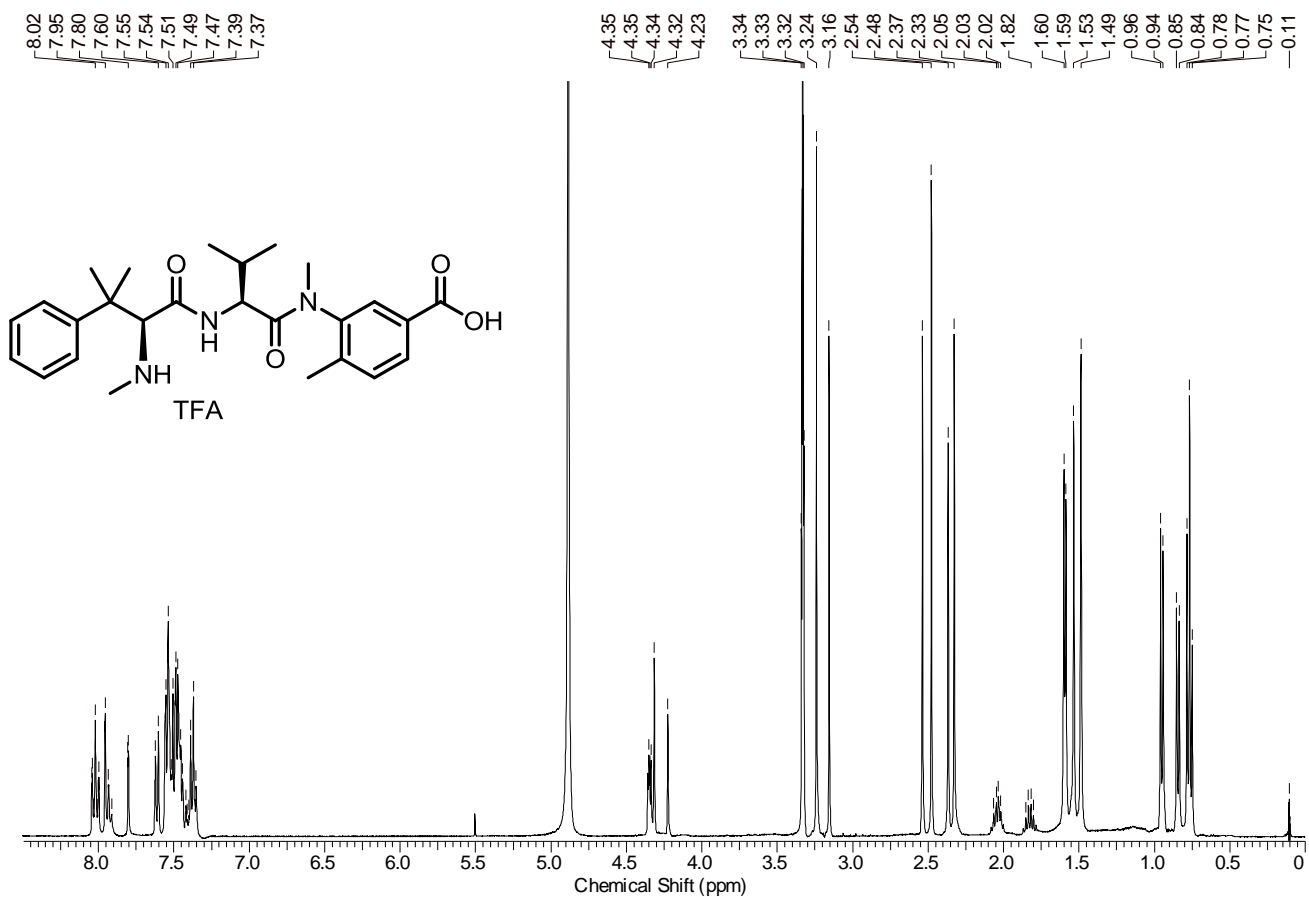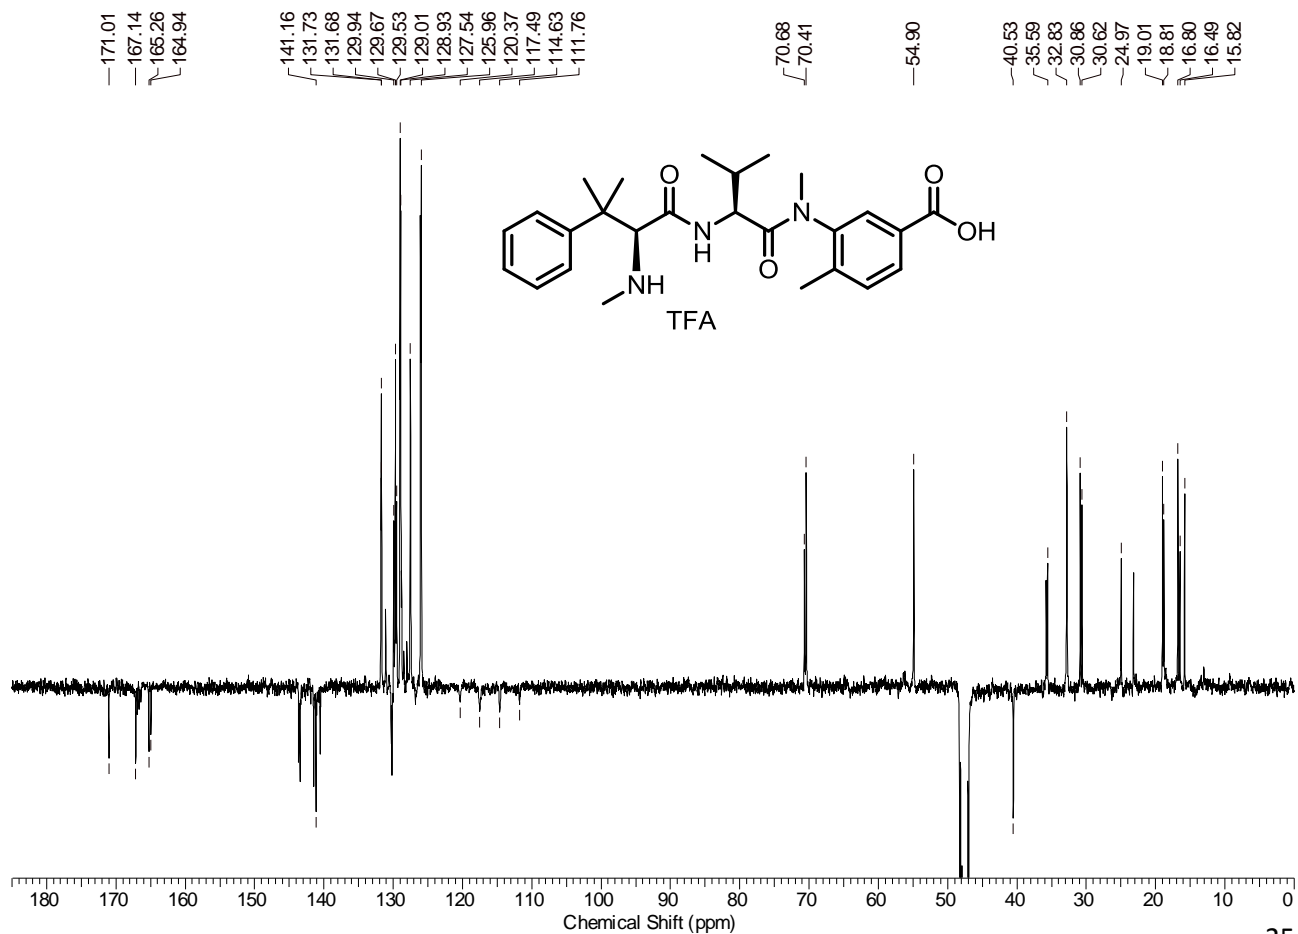

# Compound 5

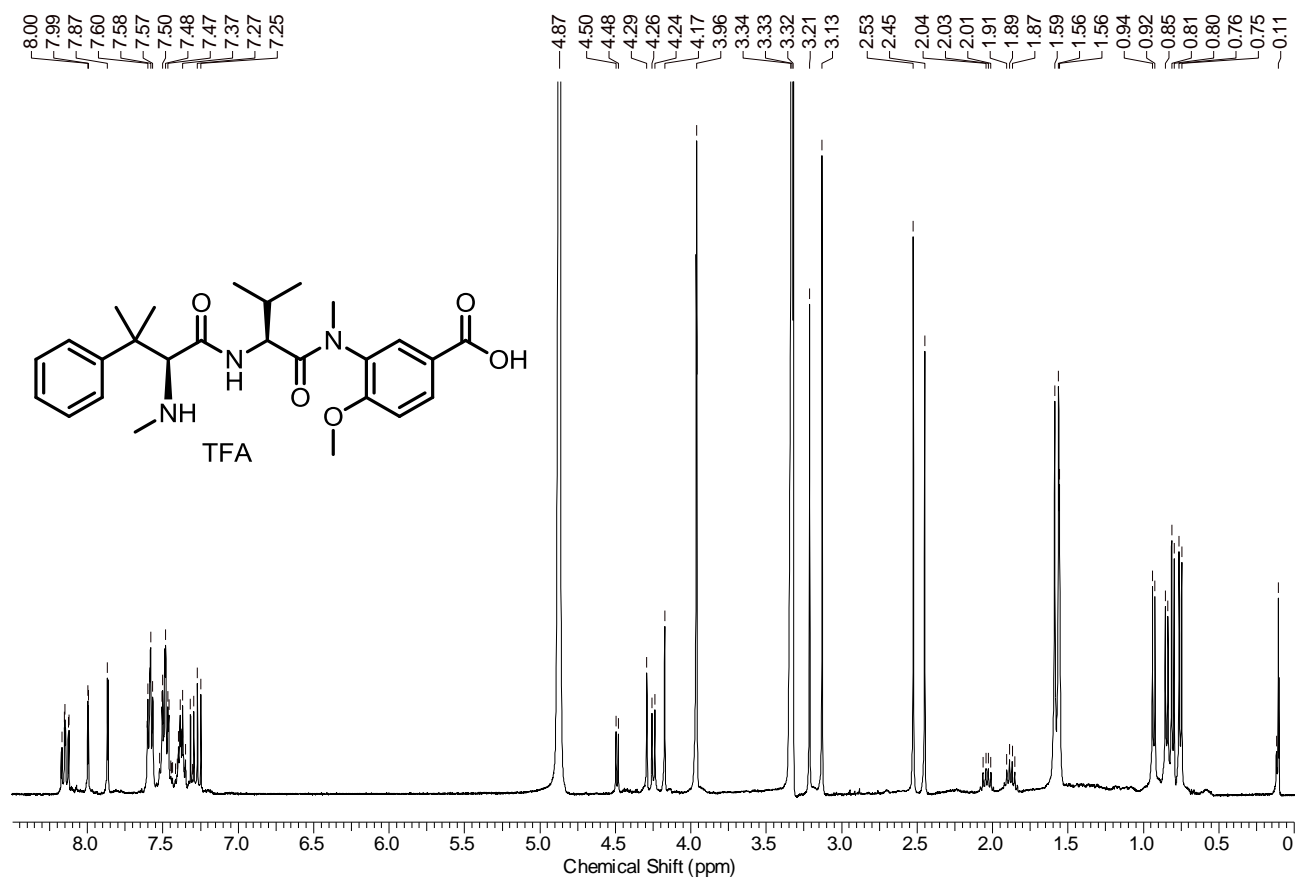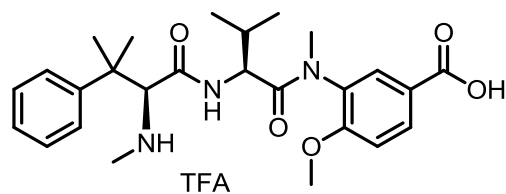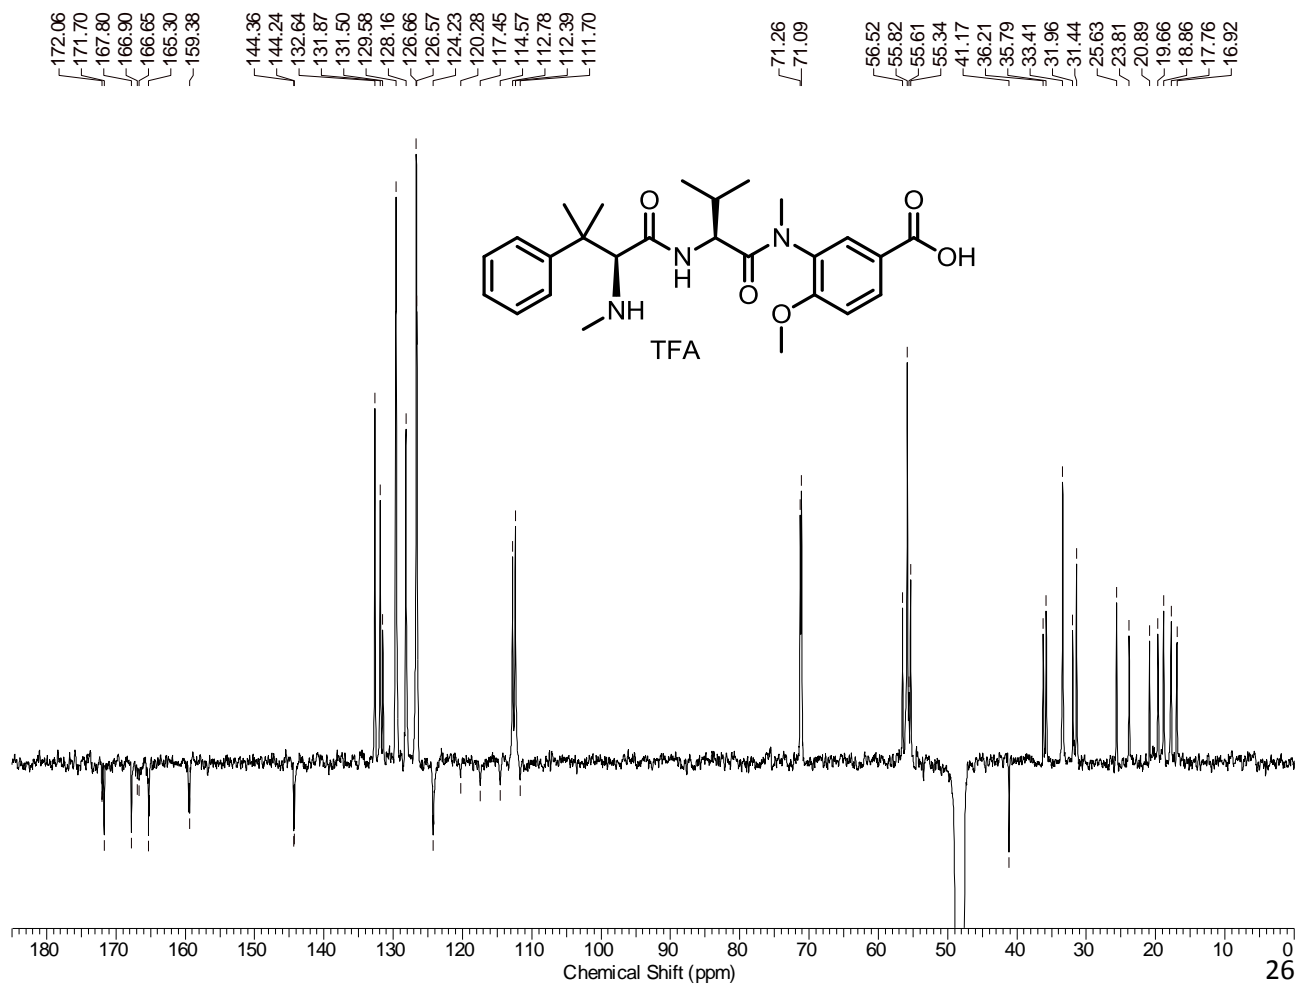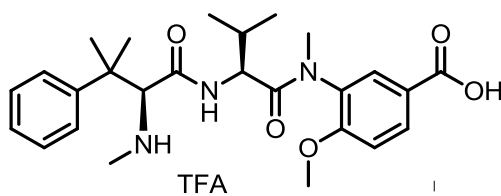

# Compound 28

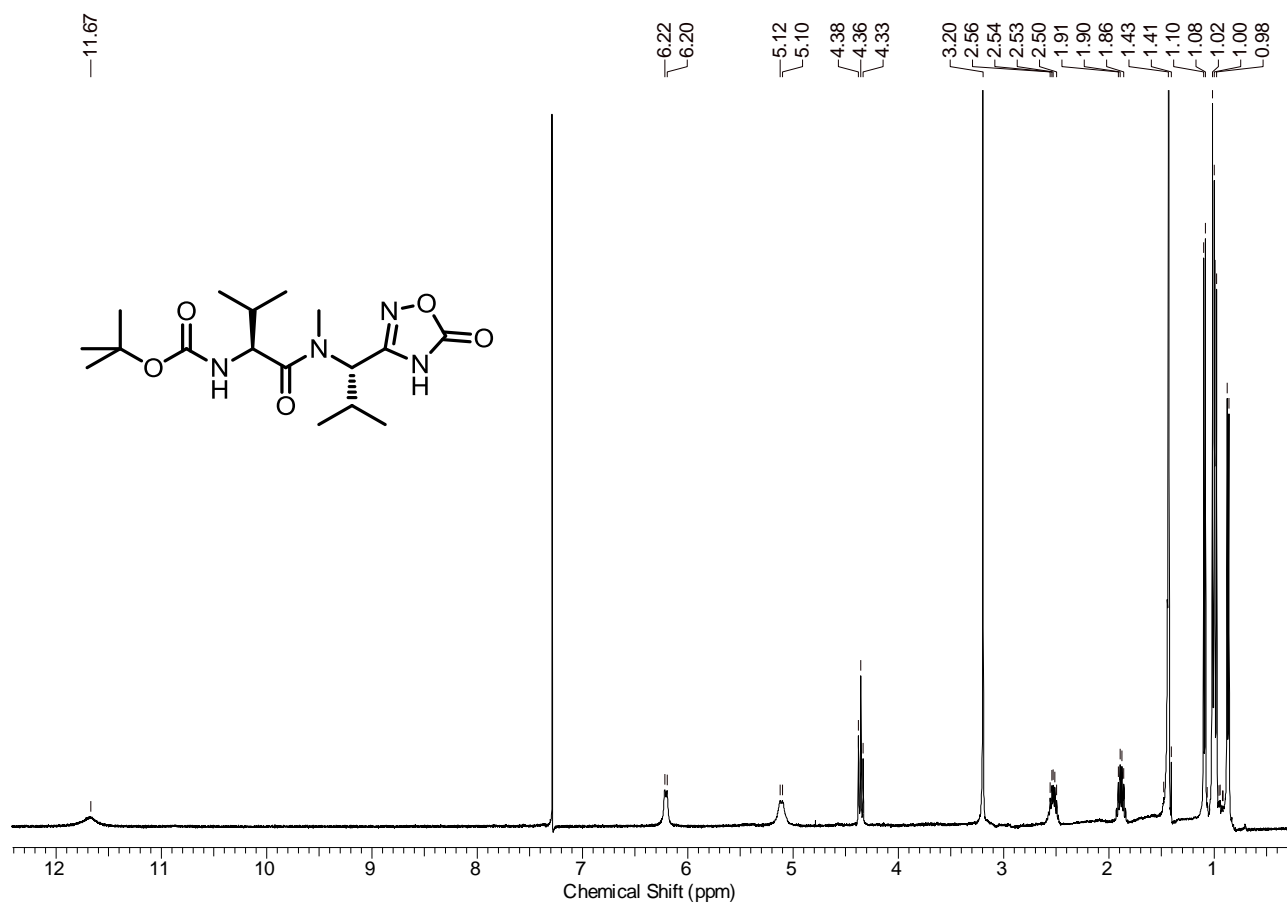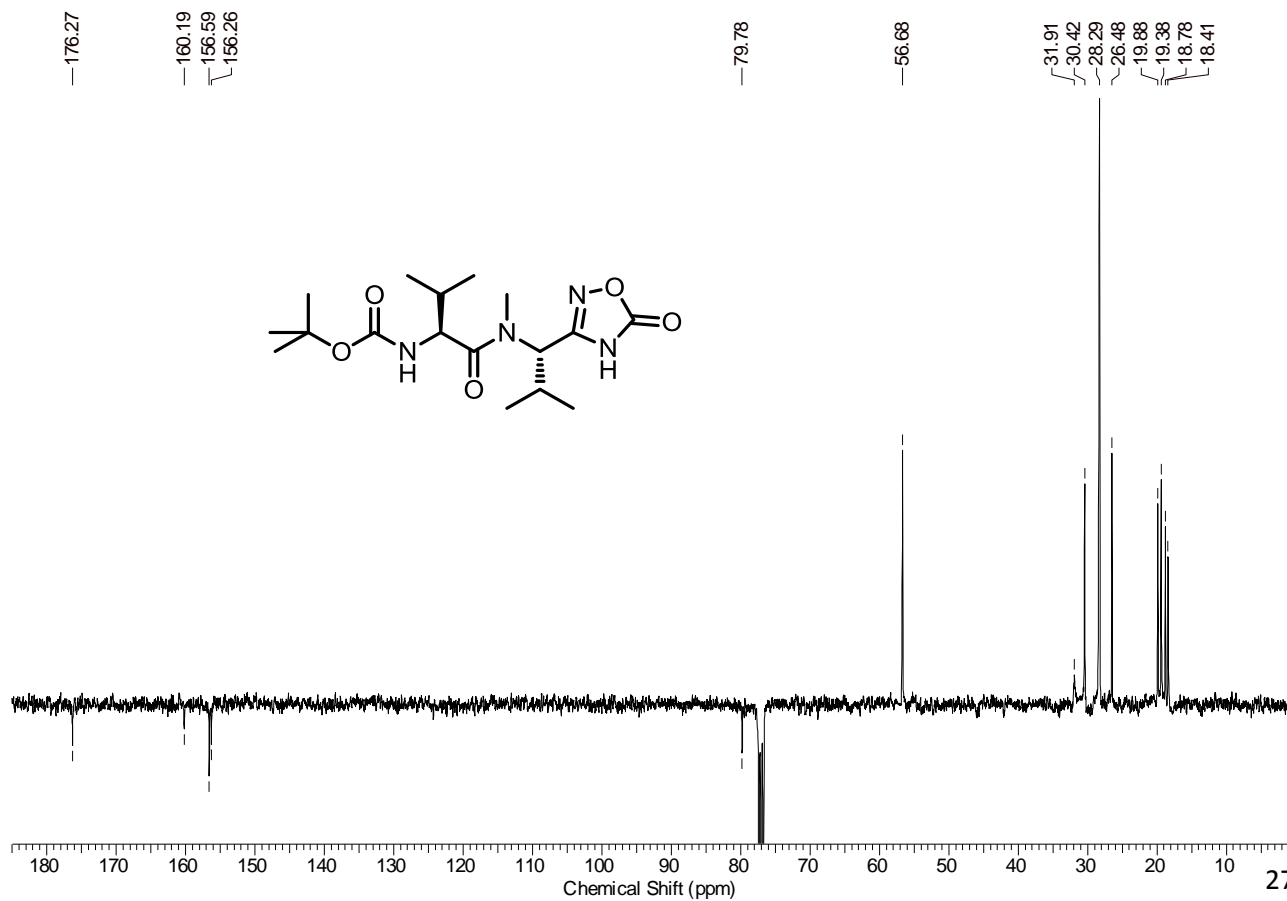

# Compound 34

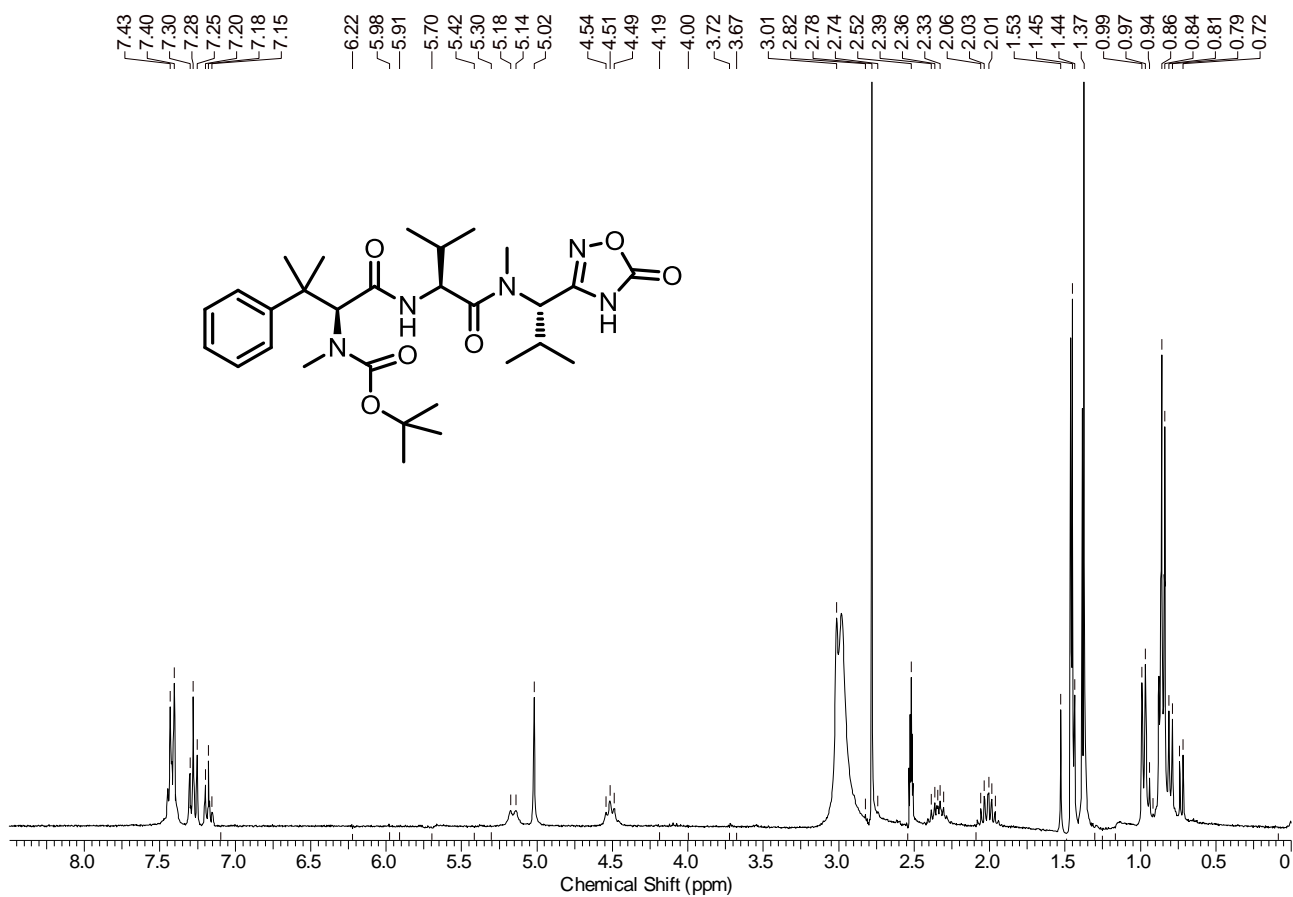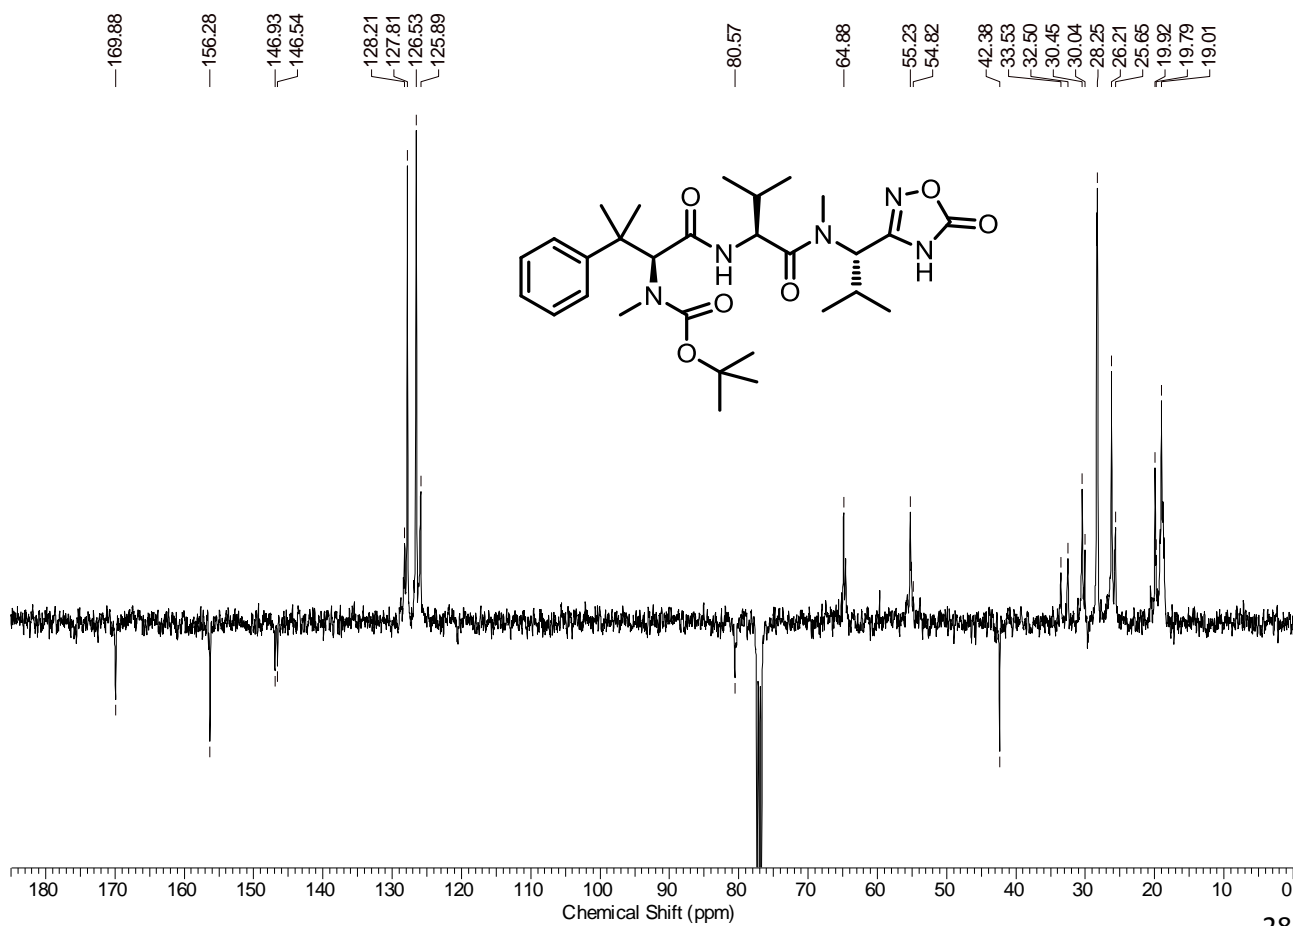

# Compound 6

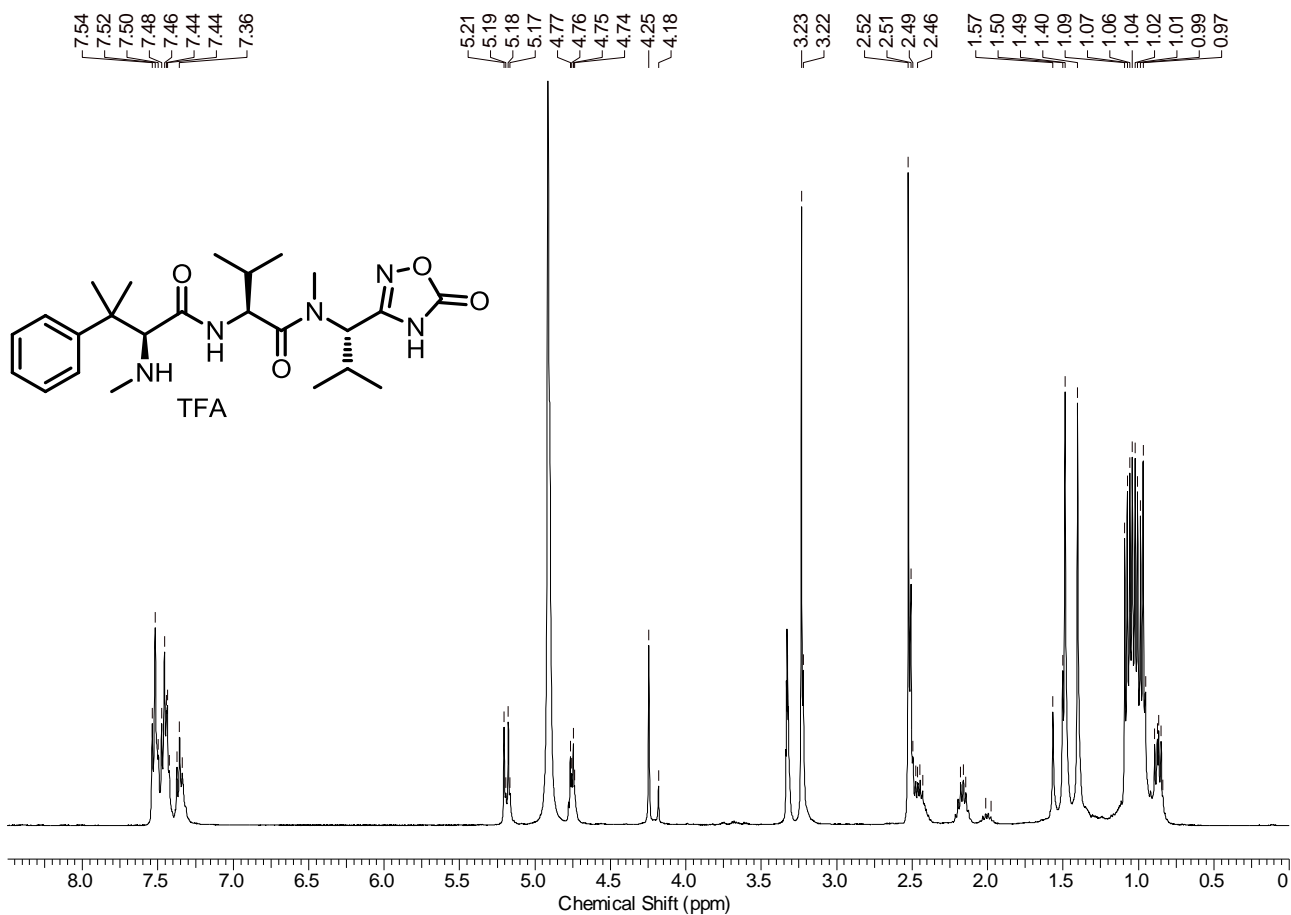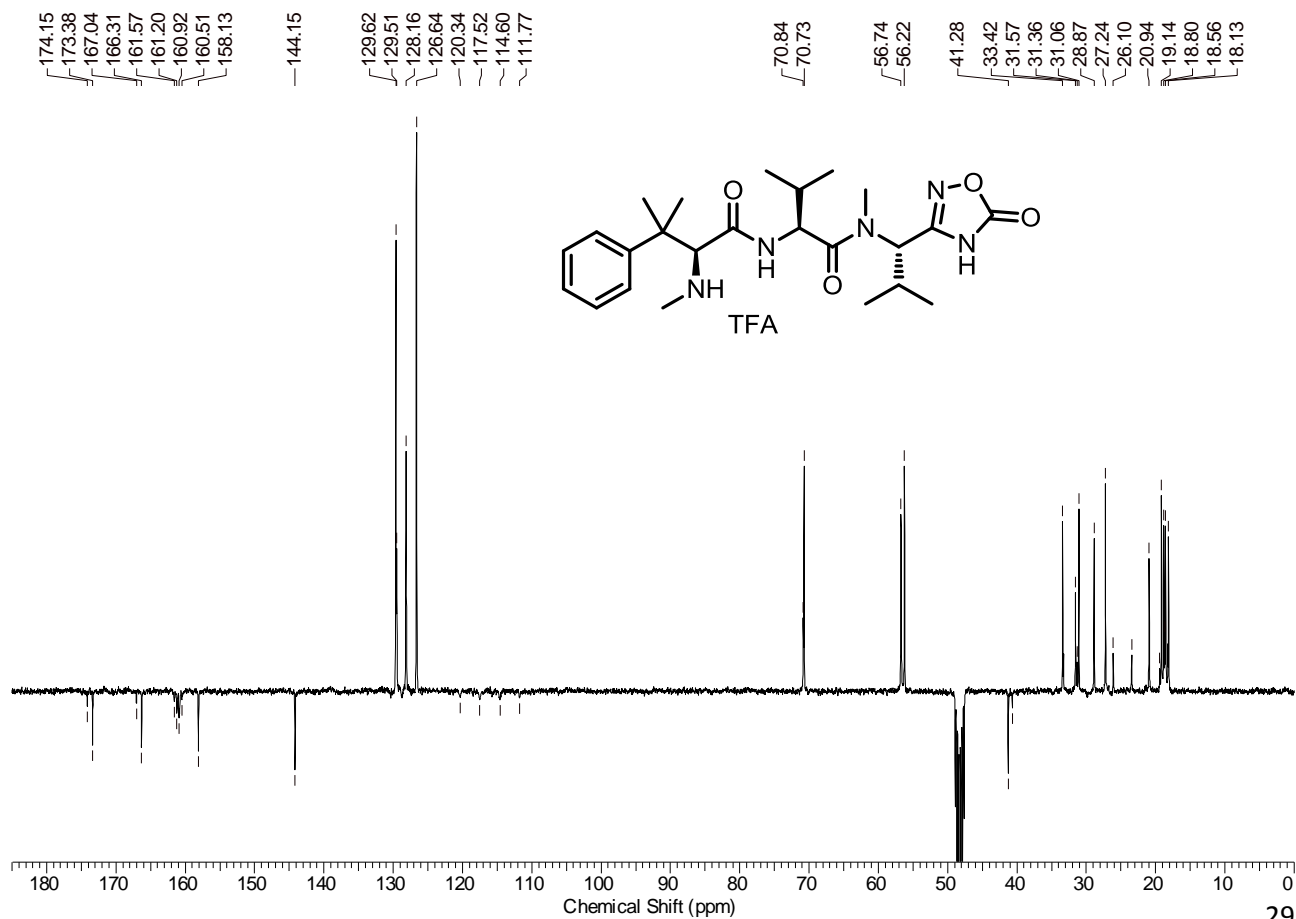

# Compound 29

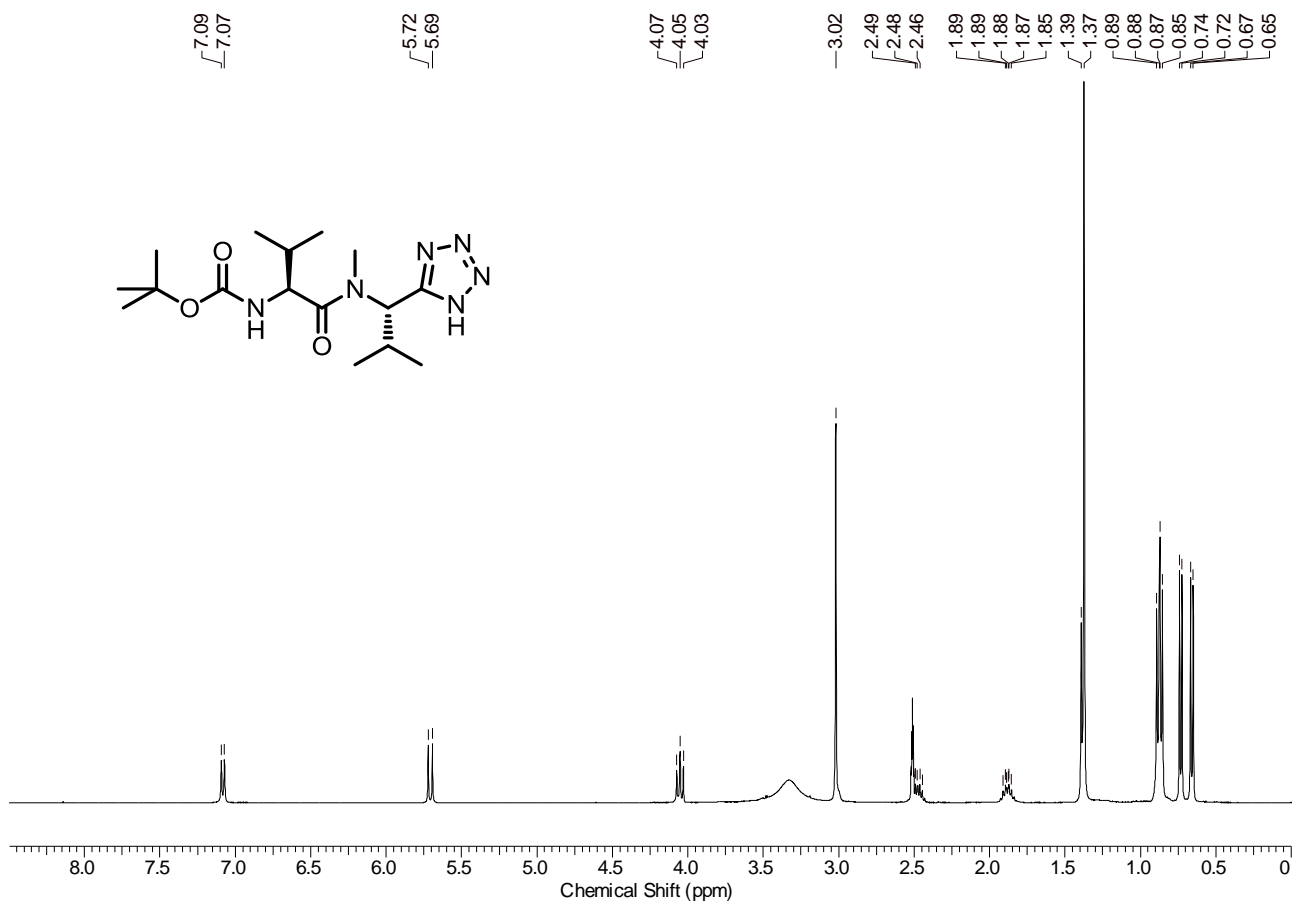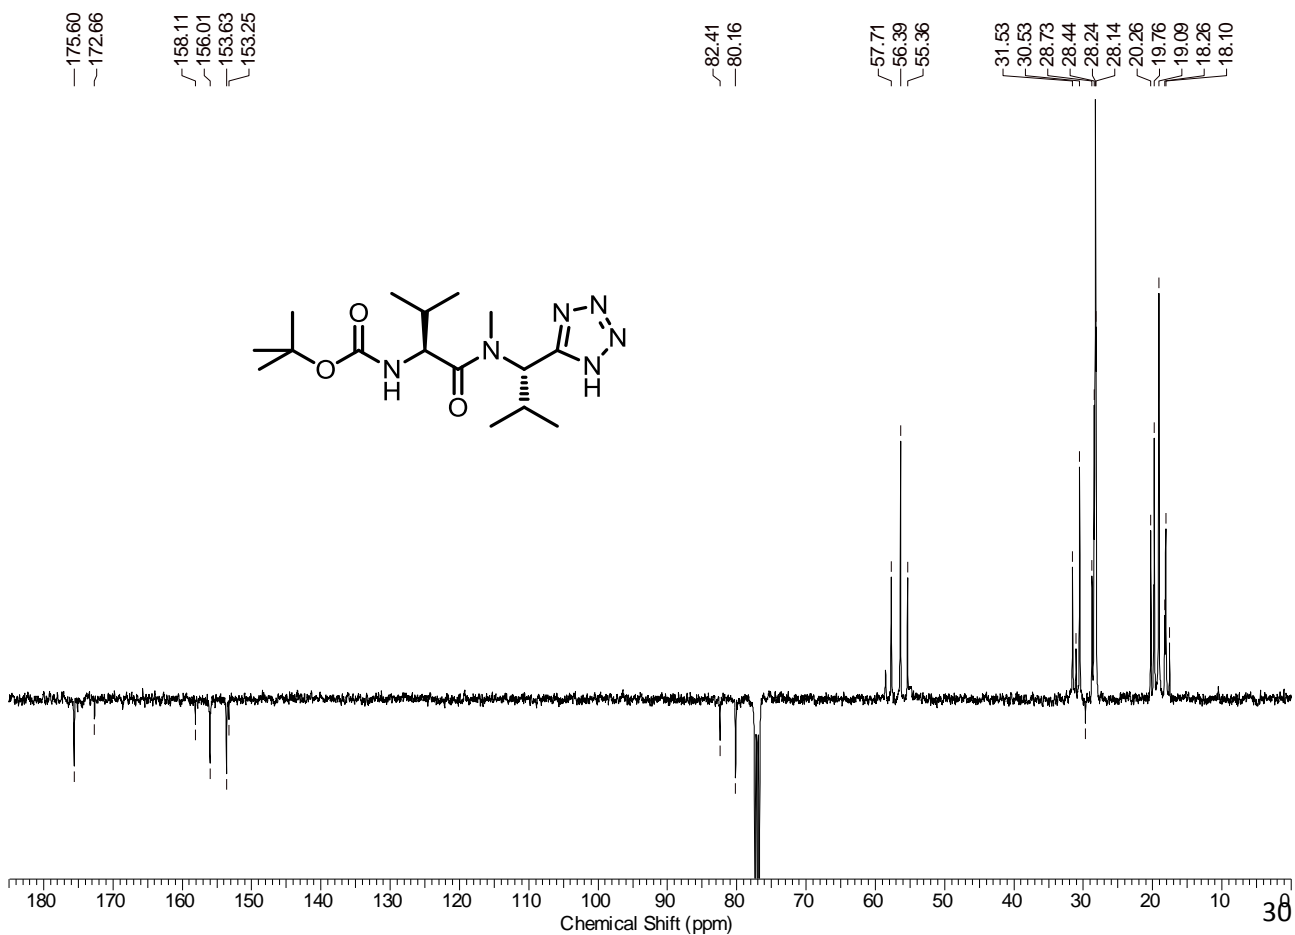

# Compound 35

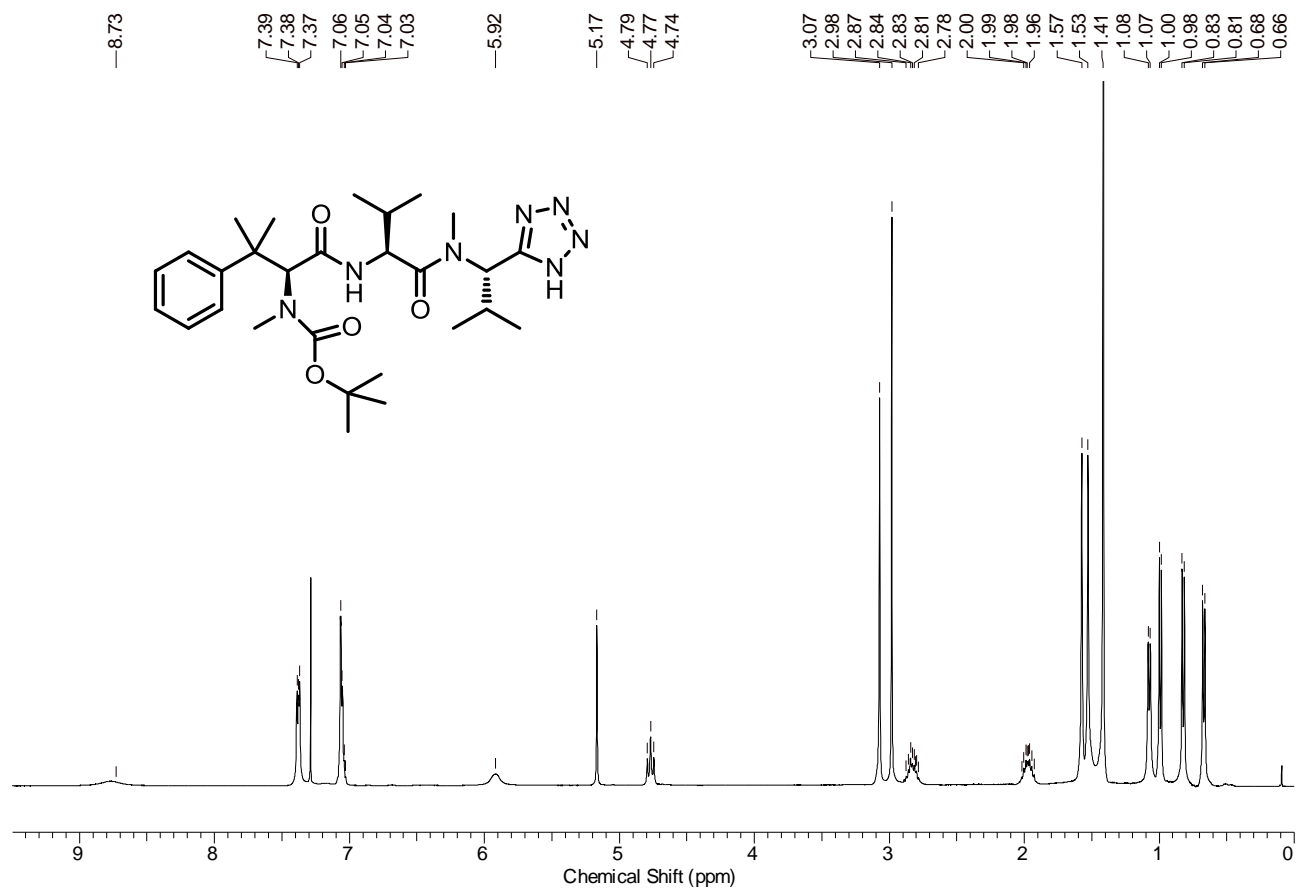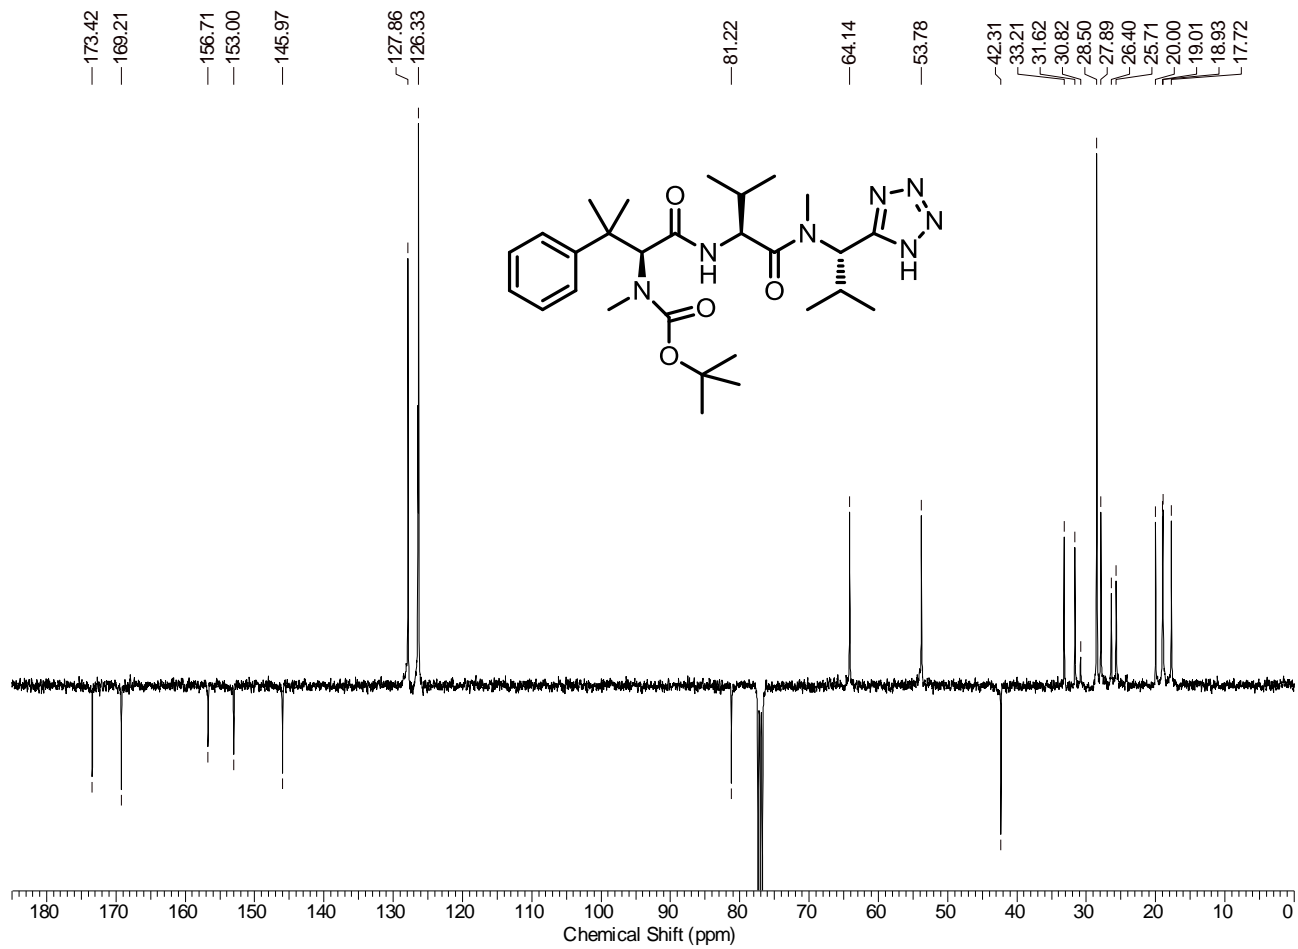

# Compound 7

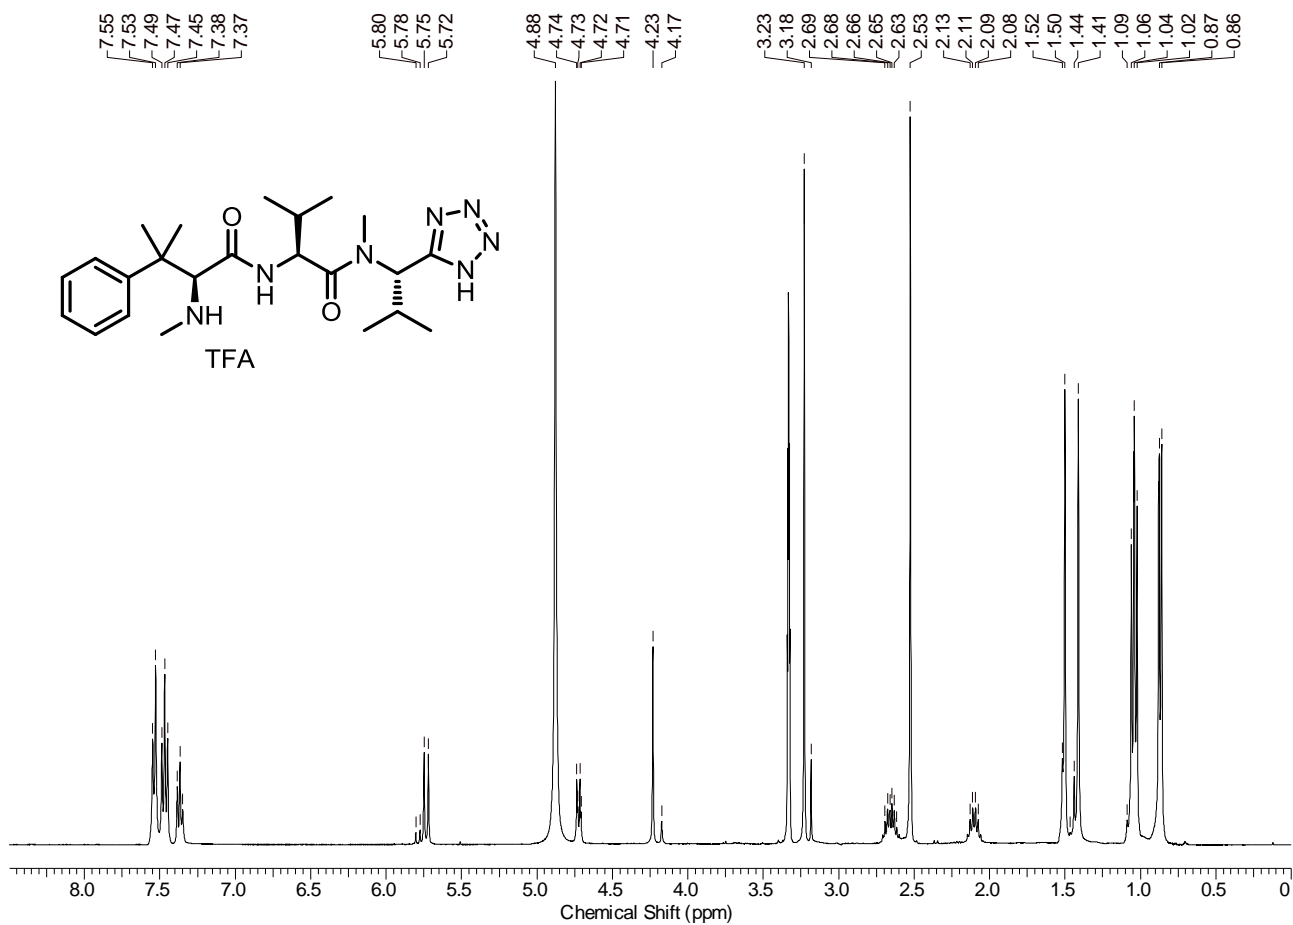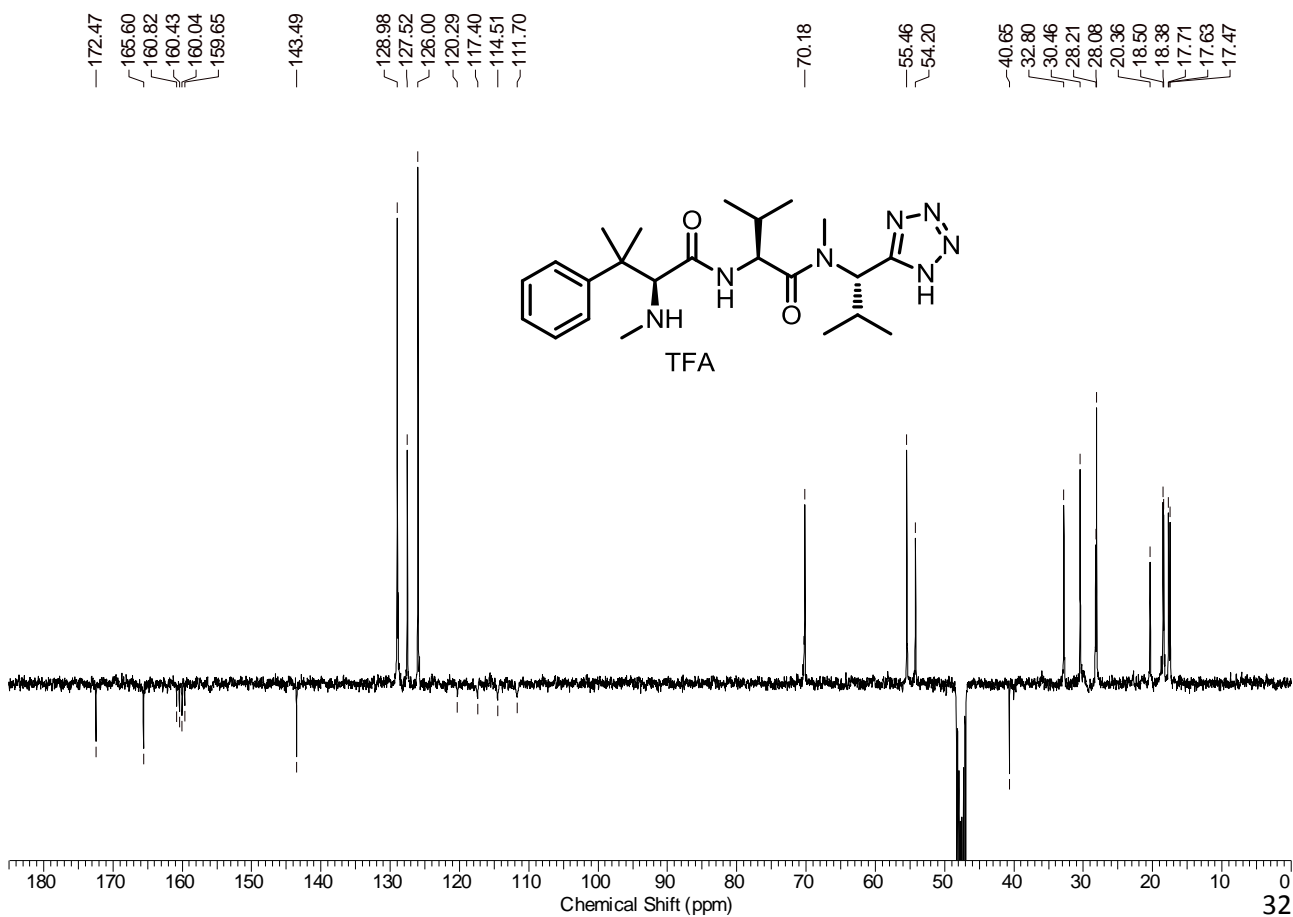



# Compound 30

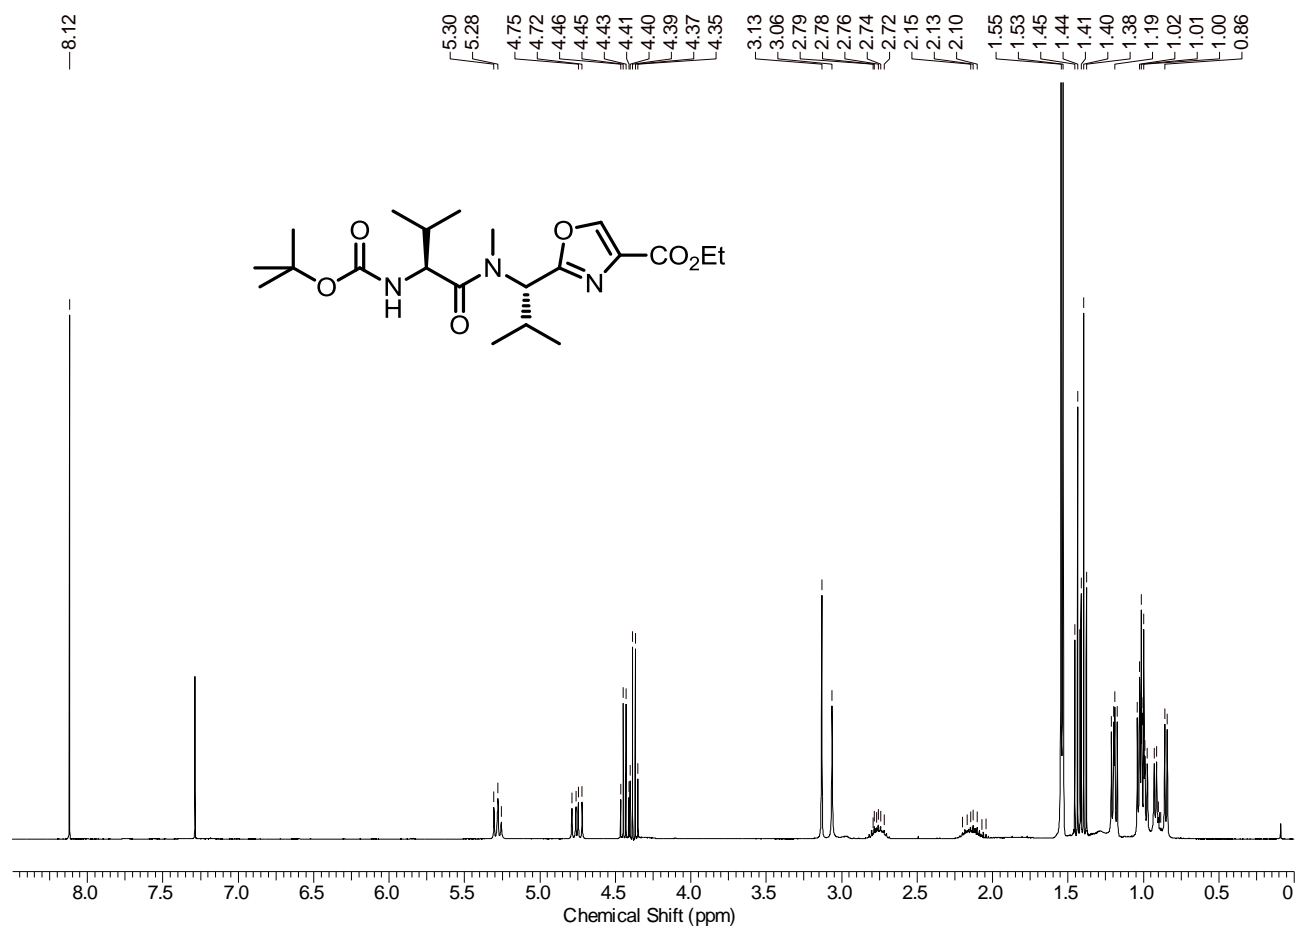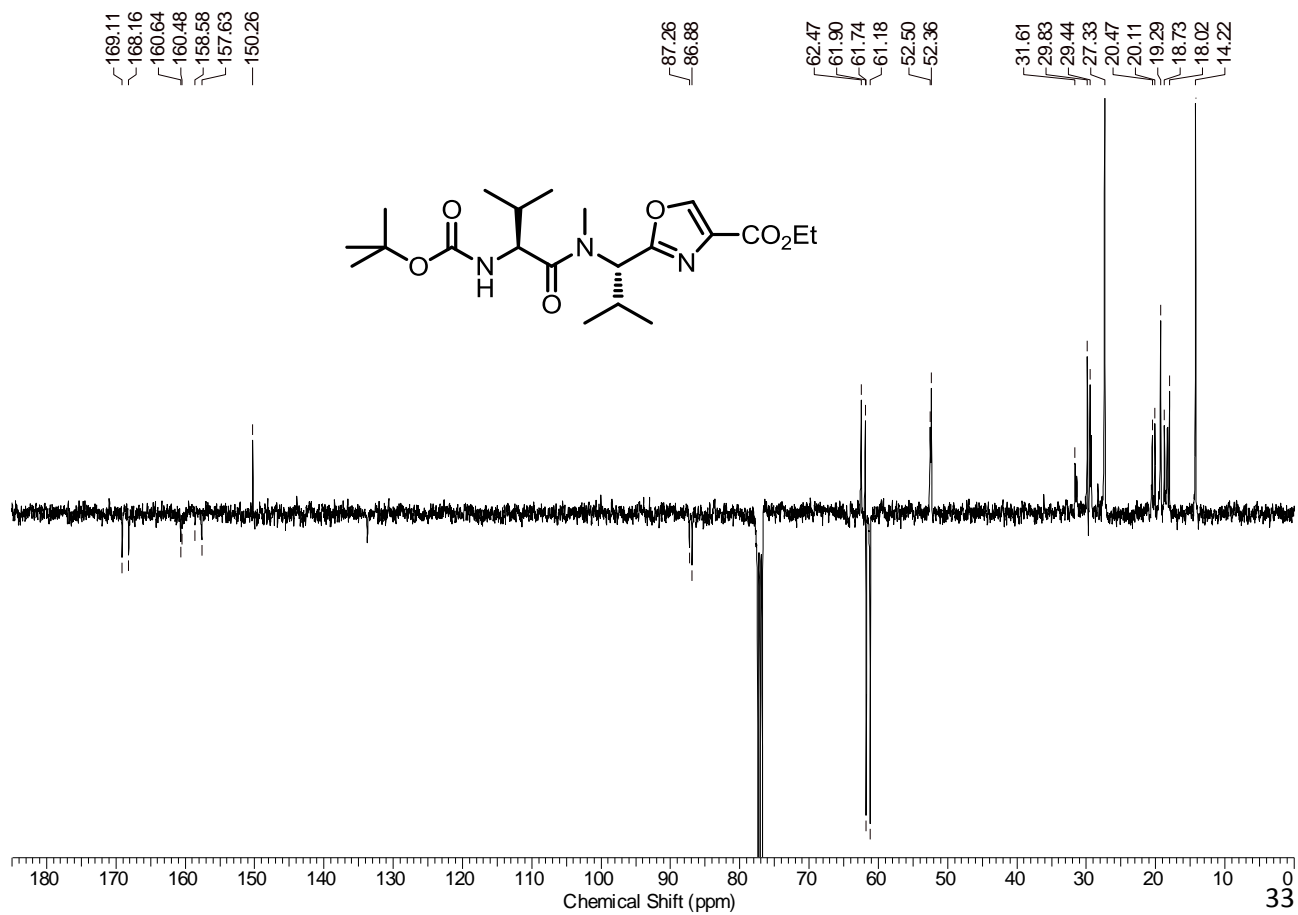

# Compound 36

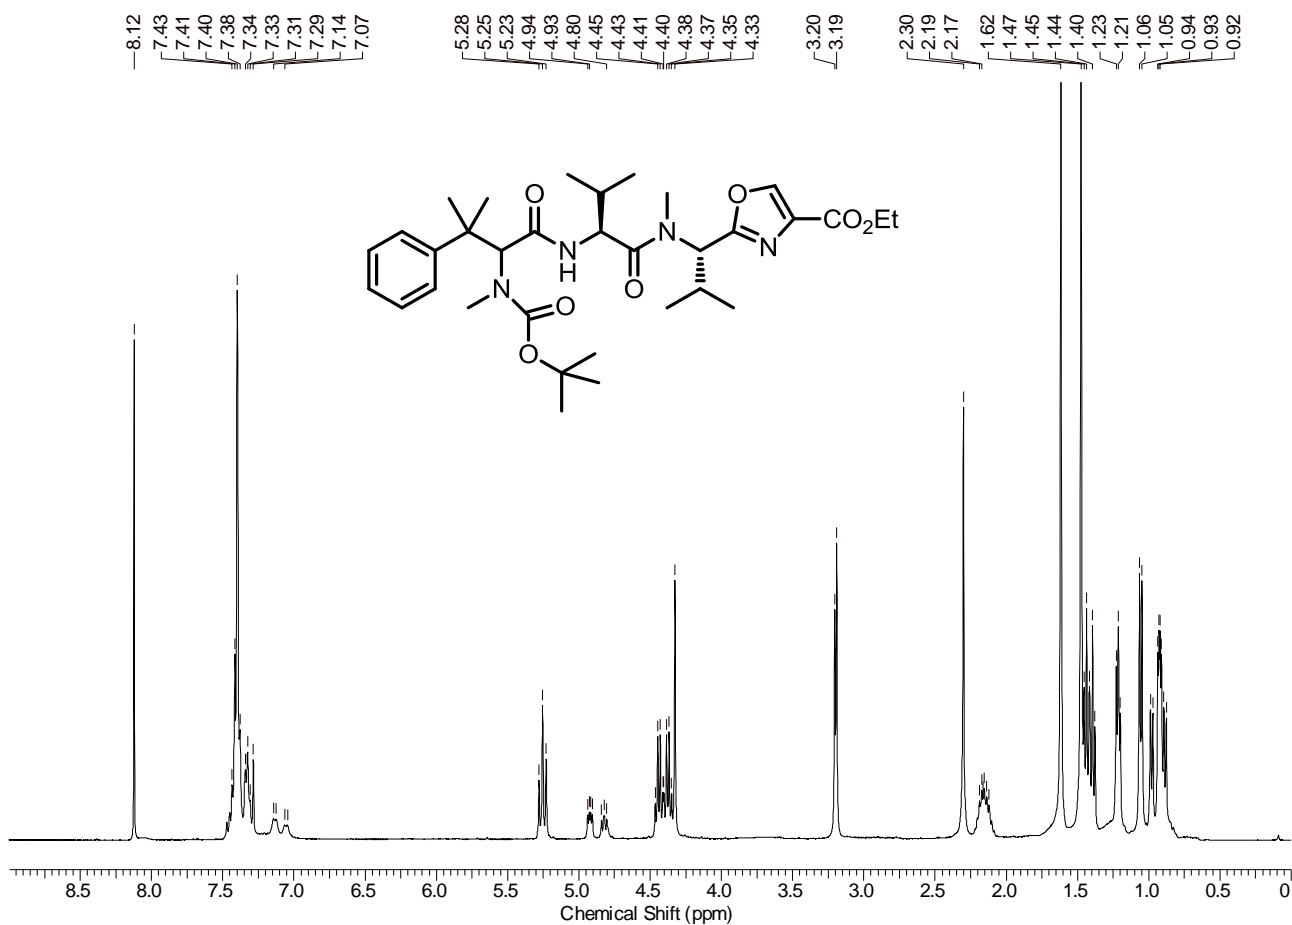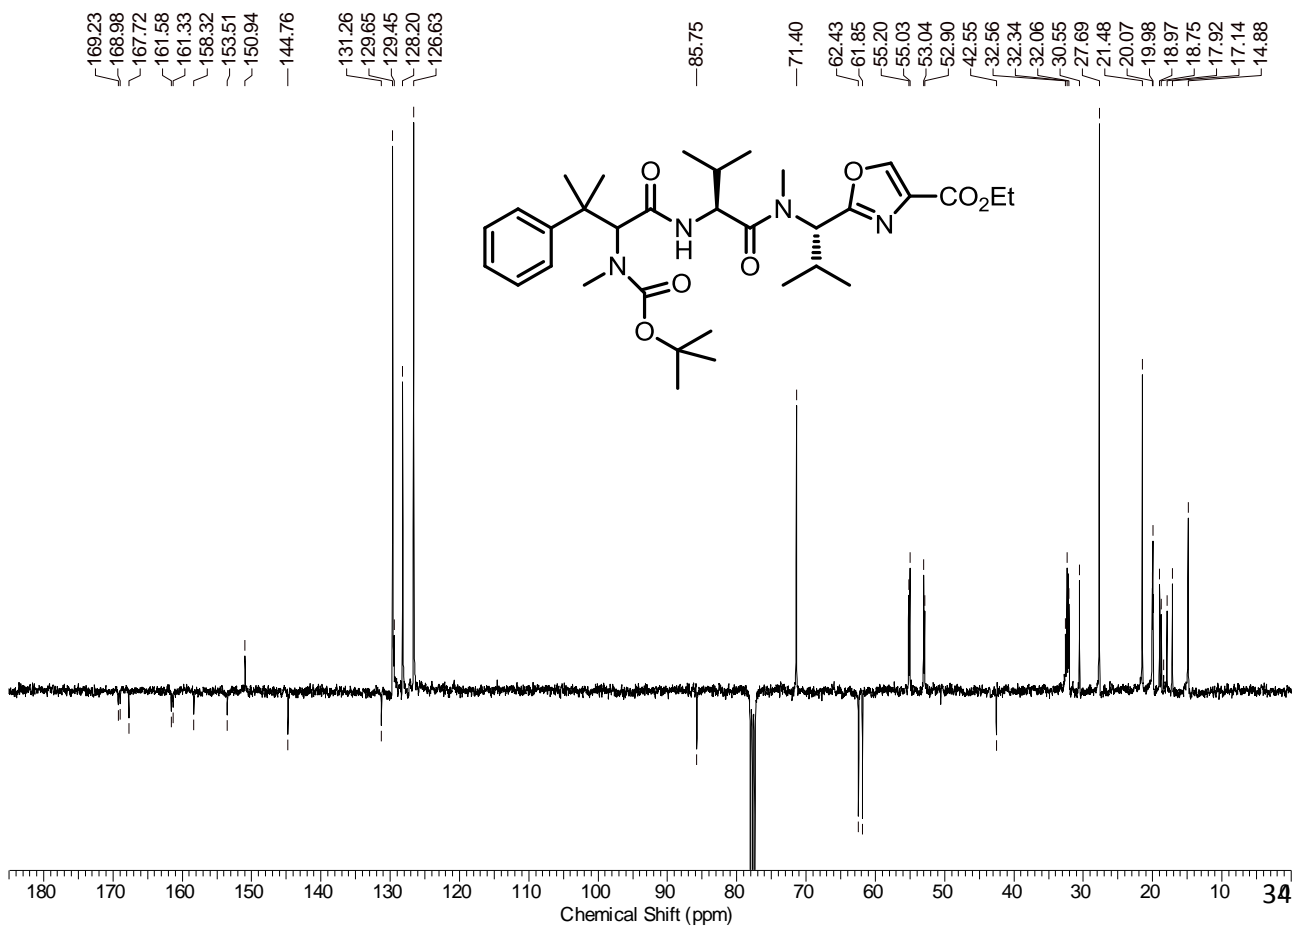

# Compound 8

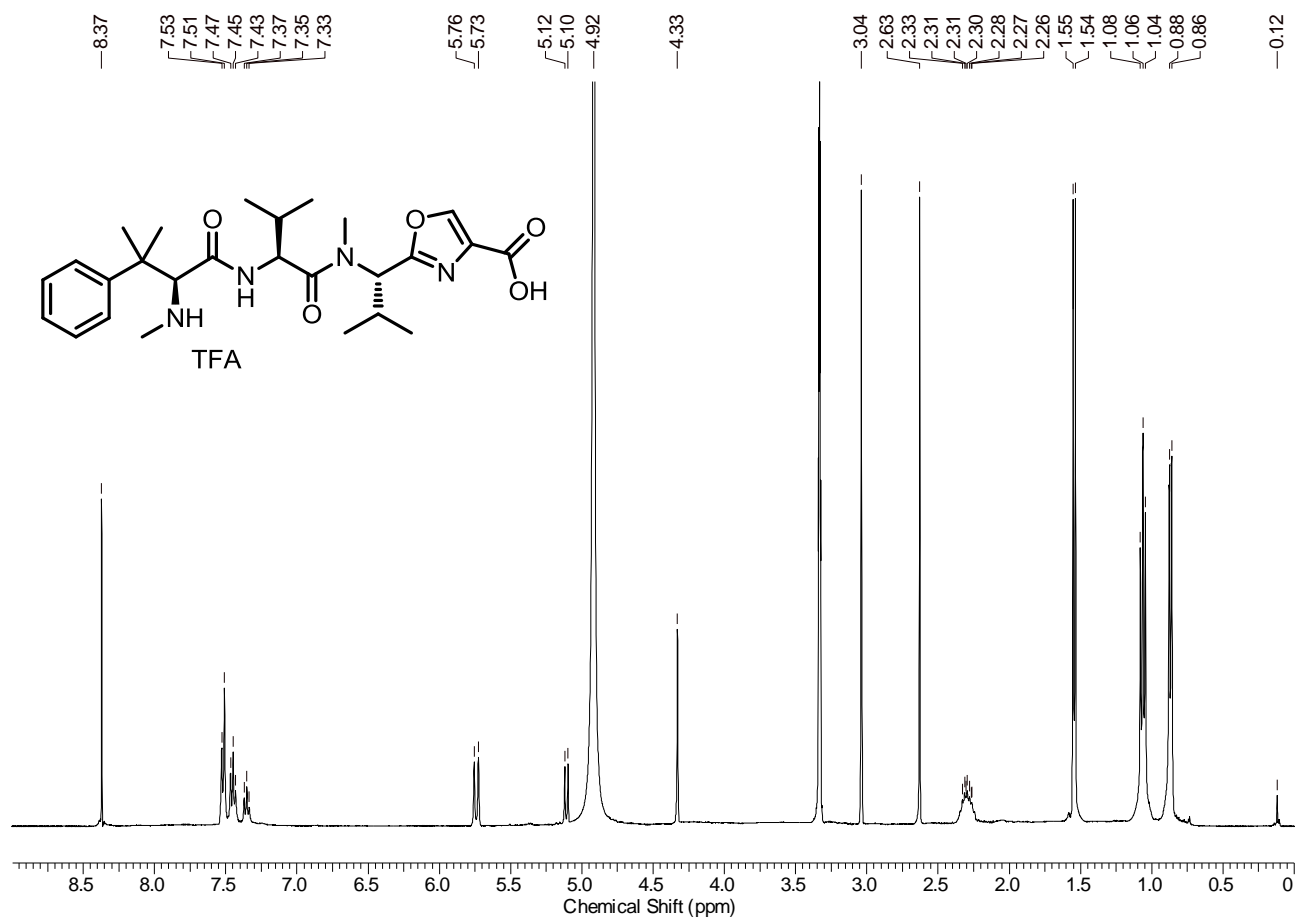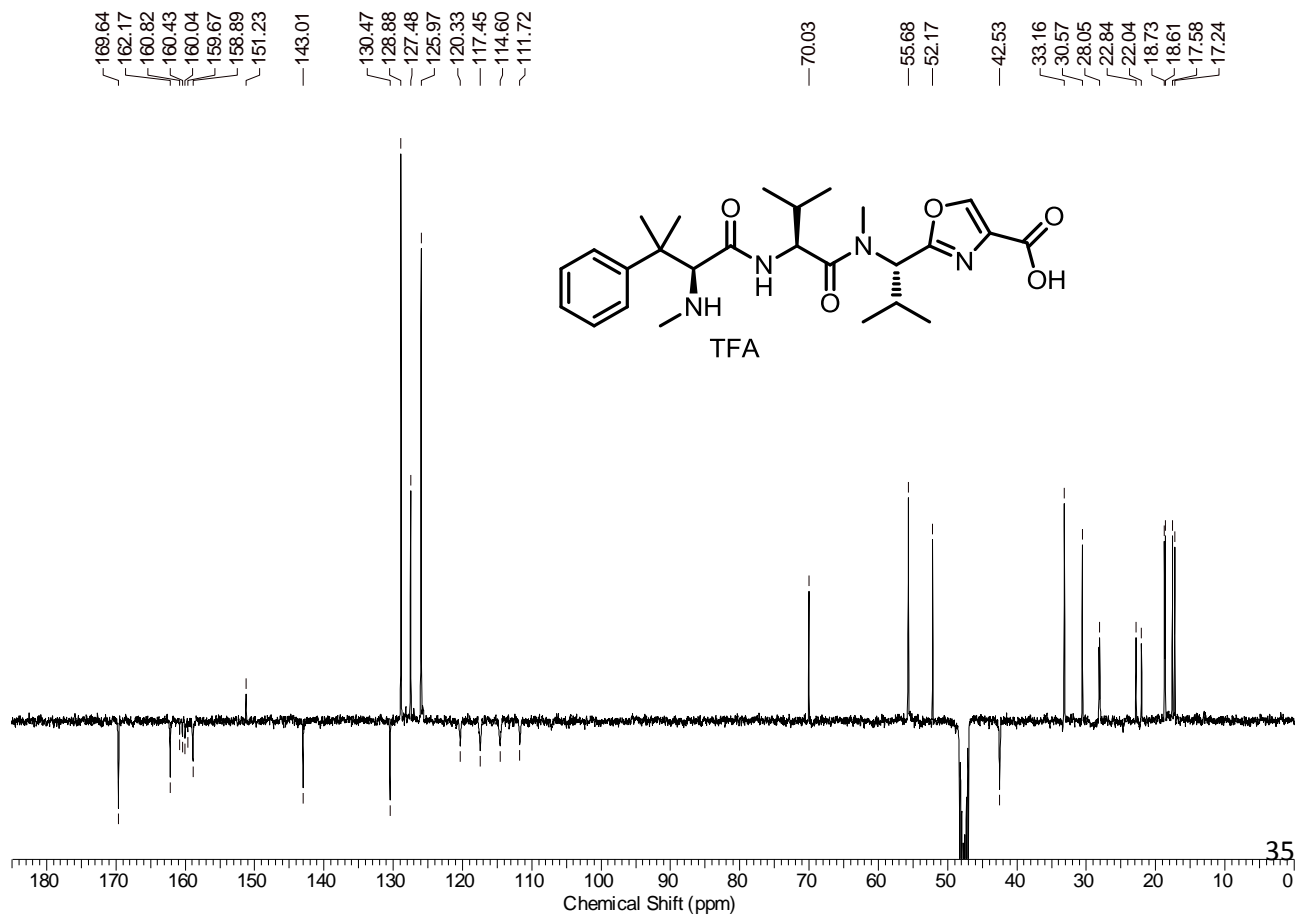

HPLC for compound **12** (Chiralcel OD-H, 98:2 *n*-hexane/isopropanol)

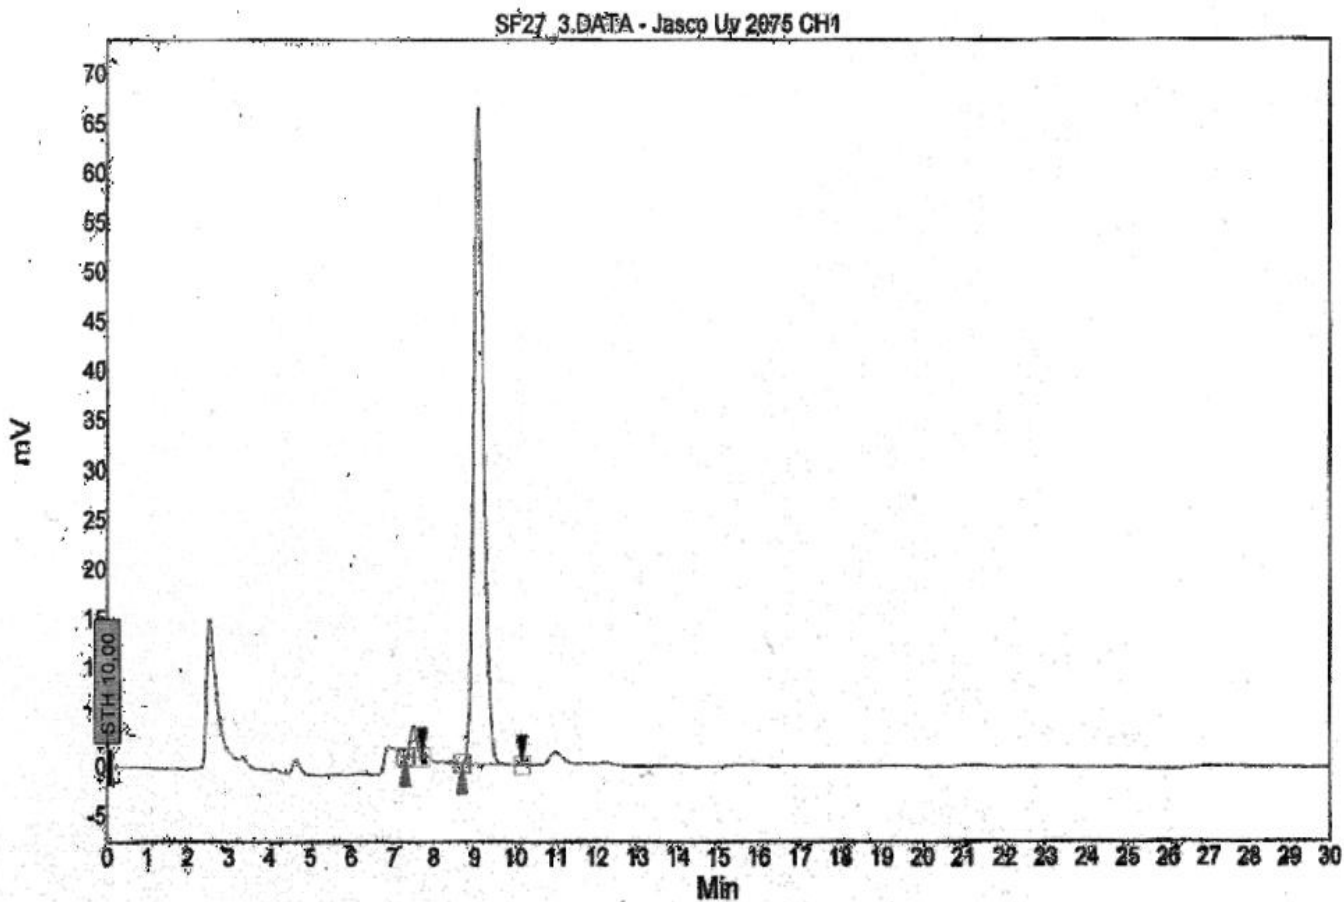

| Name | Start | Time  | End    | Height | Area     | Area %  |
|------|-------|-------|--------|--------|----------|---------|
|      | [Min] | [Min] | [Min]  | [mV]   | [mV.min] | [%]     |
| R    | 7,299 | 7,500 | 7,719  | 3,100  | 0,500    | 2,843   |
| S    | 8,687 | 9,075 | 10,157 | 66,400 | 18,800   | 97,157  |
|      |       |       |        | 69,500 | 19,300   | 100,000 |
